1 **Cell lineage as a predictor of immune response in neuroblastoma**

2

3 Satyaki Sengupta<sup>1,2,\*</sup>, Sanjukta Das<sup>1,2,\*</sup>, Angela Crespo<sup>2,3</sup>, Brian Miller<sup>4,5,6,7</sup>, Bandana Sharma<sup>1,2</sup>,  
4 Shupeei Zhang<sup>8</sup>, Ruben Dries<sup>1,2</sup>, Hao Huang<sup>1,2</sup>, Malgorzata Krajewska<sup>1,2</sup>, David N. Debruyne<sup>1,2</sup>,  
5 Luigi Soriano<sup>1</sup>, Malkiel A. Cohen<sup>8</sup>, Rogier Versteeg<sup>9</sup>, Rudolf Jaenisch<sup>8,10</sup>, Stefani Spranger<sup>10,11</sup>,  
6 Judy Lieberman<sup>2,3</sup>, Rani E. George<sup>1,2,12</sup>

7

8 <sup>1</sup>Department of Pediatric Oncology, Dana-Farber Cancer Institute, Boston, MA 02215, USA

9 <sup>2</sup>Department of Pediatrics, Harvard Medical School, Boston, MA 02215, USA

10 <sup>3</sup>Program in Cellular and Molecular Medicine, Boston Children's Hospital, Boston, MA, USA.

11 <sup>4</sup>Broad Institute of MIT and Harvard, Cambridge, Massachusetts 02142, USA.

12 <sup>5</sup>Department of Medical Oncology, Dana-Farber Cancer Institute and Harvard Medical School,  
13 Boston, Massachusetts 02215 USA.

14 <sup>6</sup>Department of Immunology, Blavatnik Institute, Harvard Medical School, Boston, MA, USA

15 <sup>7</sup>Evergrande Center for Immunological Diseases, Harvard Medical School and Brigham and  
16 Women's Hospital, Boston, MA, USA.

17 <sup>8</sup>Whitehead Institute for Biomedical Research, 455 Main Street, Cambridge, MA 02142, USA

18 <sup>9</sup>Department of Oncogenomics, Amsterdam UMC University of Amsterdam, Meibergdreef 9,  
19 1105 AZ Amsterdam, The Netherlands

20 <sup>10</sup>Department of Biology, Massachusetts Institute of Technology, Cambridge, MA 02142,  
21 USA

22 <sup>11</sup>Koch Institute for Integrative Cancer Research, Cambridge, MA 02142, USA

23 \*These authors contributed equally

24 <sup>12</sup>Corresponding author: [rani\\_george@dfci.harvard.edu](mailto:rani_george@dfci.harvard.edu)

25

26

27 **SUMMARY**

28 Immunotherapy for patients with neuroblastoma has met with limited success, partly due to an  
29 incomplete understanding of the mechanisms underlying immune responsiveness in this clinically  
30 and genetically heterogenic tumor. Here, we undertook an unbiased analysis using dimension  
31 reduction and UMAP visualization of transcriptional signatures derived from 498 primary  
32 neuroblastoma tumors. Four distinct clusters based on differentially expressed genes emerged,  
33 of which one, representing about 30% and comprising mainly of *MYCN*-nonamplified tumors, was  
34 notable for the high expression of genes associated with both immune response activation and  
35 suppression. This capacity to elicit a productive immune response resided exclusively in tumors  
36 with dominant populations of undifferentiated, neural crest-like or mesenchymal cells; by contrast,  
37 tumors comprising primarily of committed, adrenergic neuron-like cells were less immunogenic.  
38 Mesenchymal neuroblastoma cells were enriched for innate and adaptive immune gene  
39 signatures, demonstrated engagement with cytotoxic T and natural killer cells, and induced  
40 immune cell infiltration in an immunocompetent mouse model. Transcriptional or targeted therapy-  
41 induced reprogramming of adrenergic cells to the mesenchymal state led to reactivation of tumor  
42 cell-intrinsic immune genes. Key immune response genes in adrenergic tumor cells were found  
43 to be epigenetically silenced by the PRC2 complex, and such repression could be relieved by  
44 either mesenchymal cell state reprogramming or EZH2 inhibition, leading to increased activation  
45 of natural killer cells by the tumor cells. These data identify cell lineage as a major determinant of  
46 the immunogenic potential in neuroblastoma that could be used to stratify patients who are most  
47 likely to benefit from immunotherapy.

## 48 INTRODUCTION

49 The anti-disialoganglioside GD2 monoclonal antibody dinutuximab has significantly improved  
50 event free survival rates in neuroblastoma<sup>1</sup>. Derived from the developing neural crest, this  
51 common solid tumor of childhood manifests as an extracranial mass arising in the adrenal medulla  
52 or sympathetic ganglia. Approximately half of all patients have high-risk features associated with  
53 a poor outcome - age >18 months, distant metastases and unfavorable histologic and genetic  
54 factors including amplification of the *MYCN* oncogene<sup>2</sup>. The success of anti-GD2 therapy that  
55 relies on immune cell-mediated cytotoxicity suggests that patients with neuroblastoma would  
56 benefit from other forms of immunotherapy; however, treatment results with use of cytotoxic CD8+  
57 T lymphocytes directed against neuroblastoma antigens<sup>3</sup>, adoptive transfer of chimeric antigen  
58 receptor (CAR)-modified T cells<sup>4-6</sup> or checkpoint inhibition<sup>7,8</sup> have been suboptimal.

59  
60 Major impediments to the effectiveness of immunotherapy in neuroblastoma are the immune  
61 evasion tactics deployed by the tumor cells as well as the tumor microenvironment (TME)<sup>9</sup>. These  
62 include downregulation of major histocompatibility complex (MHC) class I molecules and defects  
63 in antigen-processing machinery (APM) that render neuroblastoma cells resistant to T-cell-  
64 mediated cytotoxicity<sup>10-12</sup>, downregulation of cell-surface ligands required for natural killer (NK)  
65 cell receptor activation<sup>13</sup>, upregulation of checkpoint proteins that exert a protective role from NK  
66 cell-mediated lysis<sup>14</sup>, inefficient homing of cytotoxic T-cells to the tumor site<sup>15</sup> or tumor cell  
67 overexpression of the leukocyte surface antigen CD47, which enables avoidance of macrophage-  
68 mediated phagocytosis<sup>16</sup>. Moreover, infiltration of suppressive immune cells such as T regulatory  
69 cells<sup>17</sup>, tumor-associated macrophages (TAMs)<sup>18,19</sup>, myeloid-derived suppressor cells<sup>20</sup> and  
70 secreted immunosuppressive factors such as TGF- $\beta$ , contribute to the generation of a TME that  
71 hinders an effective immune response and further dampens the effects of adoptive cell  
72 therapies<sup>21</sup>.

73

74 Amplification of the MYCN oncogene poses another distinct challenge to immunotherapy in  
75 neuroblastoma. This transcription factor is amplified in approximately 50% of high-risk cases and  
76 is associated with aggressive disease and a poor clinical outcome<sup>22,23</sup>. *MYCN*-amplified tumors  
77 consistently evade immune destruction by downregulating MHC class I molecules<sup>10</sup> and are  
78 associated with poor infiltration of cytotoxic CD8<sup>+</sup> T cells<sup>24,25</sup> and reduced expression of NK cell  
79 ligands<sup>26</sup>. Interestingly, approximately half of high-risk neuroblastomas do not express amplified  
80 *MYCN*, and their capacity to induce a productive immune response remains unclear. In a recent  
81 study that analyzed the immune gene expression programs associated with *MYCN*-nonamplified  
82 tumors from high-risk patients, tumors with low as well as high functional tumor *MYCN* signatures  
83 were observed to have significantly higher levels of NK and CD8<sup>+</sup> T-cell infiltrates compared to  
84 *MYCN*-amplified tumors; although, somewhat counterintuitively, these findings translated into a  
85 better outcome only in patients with high *MYCN* tumor signatures<sup>25,27</sup>.

86  
87 Thus, although many of the mechanisms of immune evasion in neuroblastoma are known,  
88 further understanding of the tumor-host interaction will be crucial to enhancing the ability of  
89 immunotherapy to target and eliminate tumor-initiating and propagating cell populations.  
90 Especially challenging is the genetic and biologic heterogeneity of this tumor which makes it  
91 difficult to identify factors that consistently indicate the likelihood of an effective immune response  
92 and hence identify patients who are most likely to benefit from this form of therapy. Thus, we  
93 undertook an unbiased analysis of gene expression signatures across diverse clinical subtypes  
94 of primary tumors and identify tumor cell state as an important predictor of immune  
95 responsiveness in neuroblastoma.

96

## 97 RESULTS

### 98 A subset of primary neuroblastomas express markers of a productive immune response

99 To determine whether neuroblastomas are capable of eliciting a productive immune response,  
100 we first examined bulk RNA-sequencing data from 498 well-annotated primary human tumors  
101 representing diverse clinical and genetic subtypes (SEQC-498; GSE49711; **Supplementary Fig.**  
102 **1a**) to quantify tumor-to-tumor gene expression variability and cluster tumor types based on gene  
103 expression profiles (see also Methods). In this unbiased analysis, all tumors within one cluster  
104 would share similar gene expression profiles, while being dissimilar to those of tumors within other  
105 clusters. Specifically, we first identified the top 5000 highly variably expressed genes within this  
106 dataset based on the premise that these would be most likely to contribute to distinct molecular  
107 subtypes<sup>28,29</sup> (**Supplementary Fig. 1b; Supplementary Table 1**). The data were dimensionally  
108 reduced using principal component analysis (PCA) and the top 20 leading principal components  
109 selected for clustering analysis (**Supplementary Fig. 1c**). Four distinct clusters were identified  
110 and visualized using 2D-Uniform Manifold Approximation and Projection (UMAP), a non-linear  
111 dimension-reduction tool<sup>30,31</sup> (**Fig. 1a**). To explore the transcriptional differences between the  
112 clusters, we identified the differentially expressed genes (DEGs) in each cluster and noted that  
113 tumors in cluster 1 (C1; n = 103), termed *Hi-MYCN*, were enriched for MYCN target genes  
114 involved in cell proliferation and biosynthesis, and comprised 20% of the tumor set (**Fig. 1a-c;**  
115 **Supplementary Fig. 1d; Supplementary Table 2**). Not surprisingly, this cluster segregated with  
116 *MYCN*-amplified tumors in patients aged  $\geq 18$  months with stage 4 disease [according to the  
117 international neuroblastoma staging system (INSS)]<sup>32</sup> and annotated “high risk” status (based on  
118 the Children’s Oncology Group risk classification)<sup>33</sup> (**Fig. 1d; Supplementary Fig. 1e**). The  
119 remaining clusters consisted of *MYCN*-nonamplified tumors (**Fig. 1a**) of which, cluster 2 (C2, n =  
120 241), or *neuronal*, made up the largest proportion of tumors, 48%, and comprised tumors that  
121 were enriched for DEGs with roles in nervous system

Fig. 1.

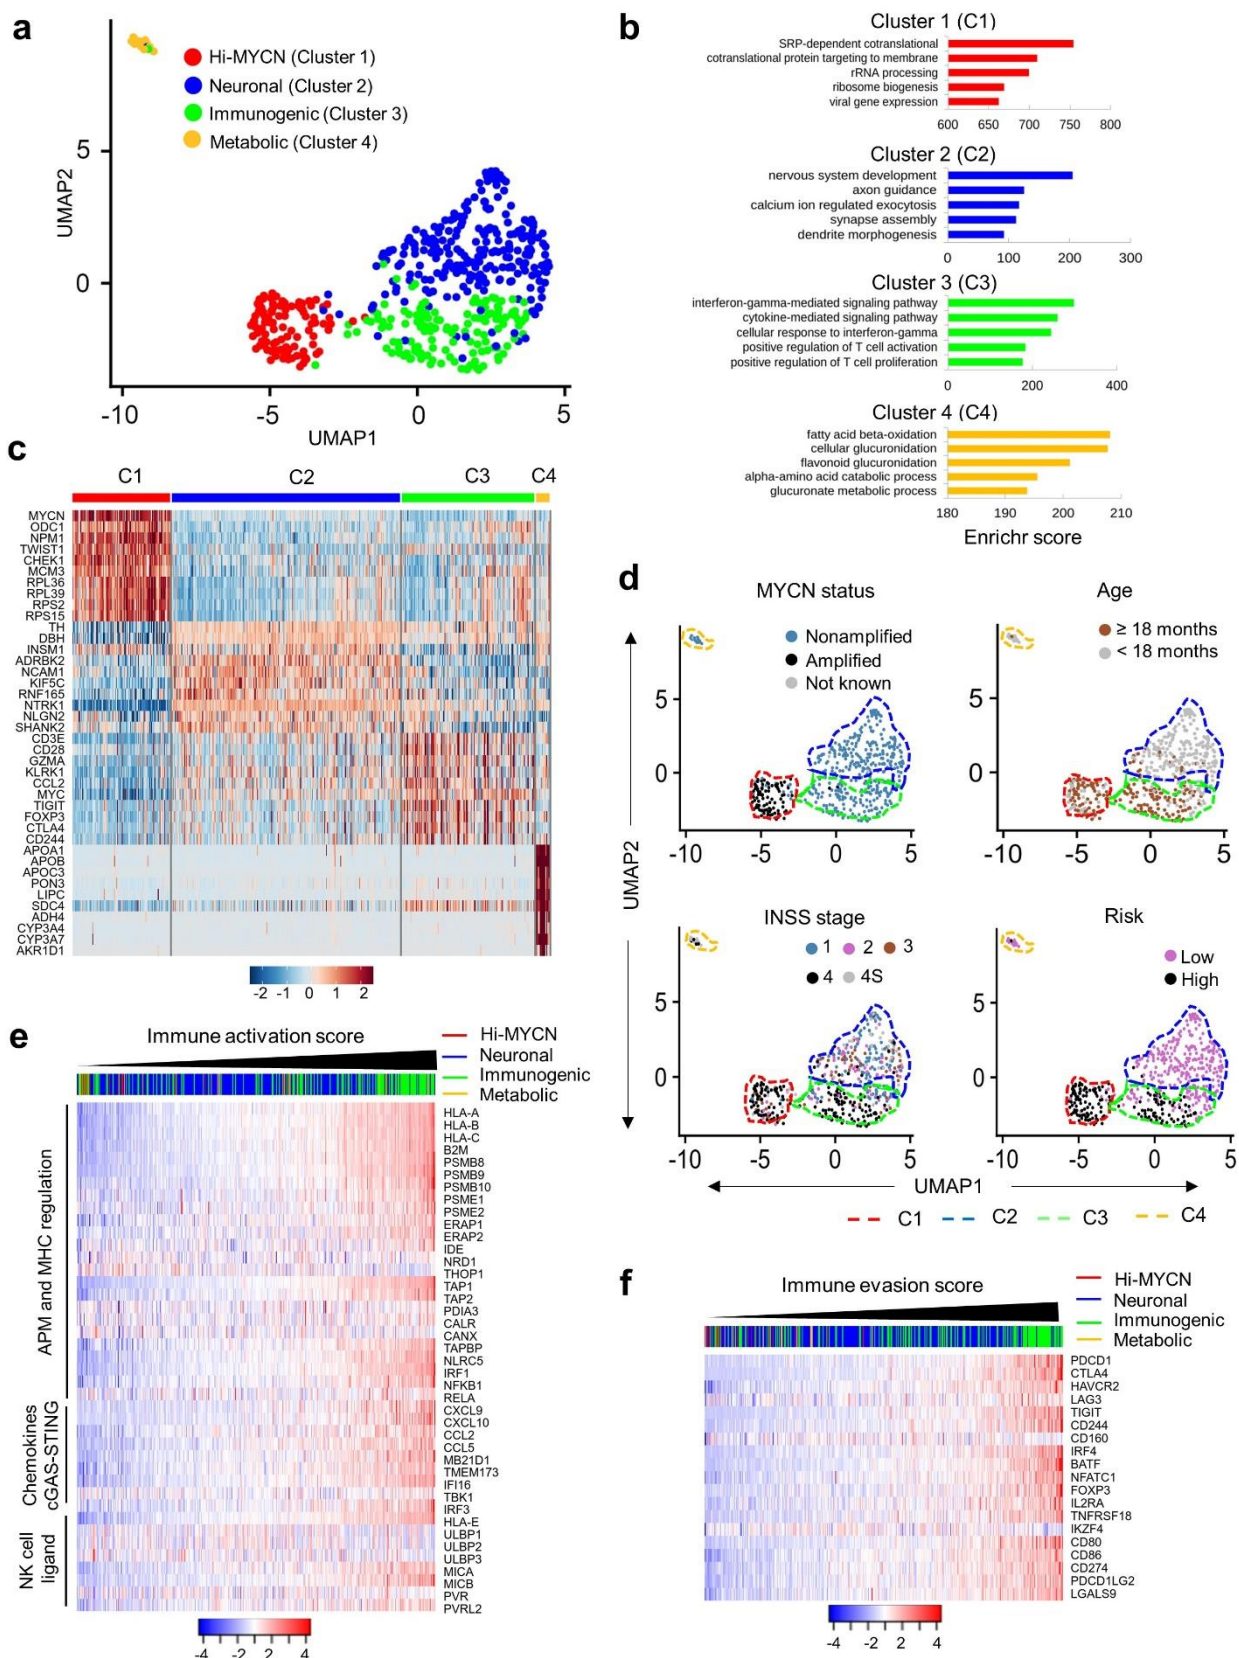



122 **Fig. 1. A subset of neuroblastomas exhibits a productive immune response. (a)** Two-  
123 dimensional UMAP representations of the gene expression profiles in 498 neuroblastoma (NB)  
124 tumors. Each dot represents a tumor. The top 5000 highly variable genes were selected based  
125 on the variance-stabilizing method<sup>34</sup> and the 20 significant principal components (PCs) selected  
126 and processed in UMAP to generate four clusters representing four NB subtypes. The DEGs were  
127 identified for each cluster using the receiver operating characteristics (ROC) curve to compare  
128 one cluster with other three ( $\log_2$  FC > 0.25). **(b)** Gene ontology (GO) analysis of top DEGs in the  
129 four clusters. **(c)** Heat map of expression values of 10 representative DEGs within each cluster.  
130 Rows are z-score scaled average expression levels for each gene in all four clusters. **(d)** UMAP  
131 visualization of the distribution of the indicated prognostic features in NB among the four different  
132 clusters. **(e, f)** Heat map of z-score transformed  $\log_2$  normalized expression values of immune  
133 activation **(e)** and evasion **(f)** genes in *MYCN*-nonamplified NBs (n=401). Tumors were ranked  
134 based on increasing immune activation or evasion scores. Cluster annotations of the tumors are  
135 indicated on the top horizontal bar.

**Supplementary Fig. 1.**

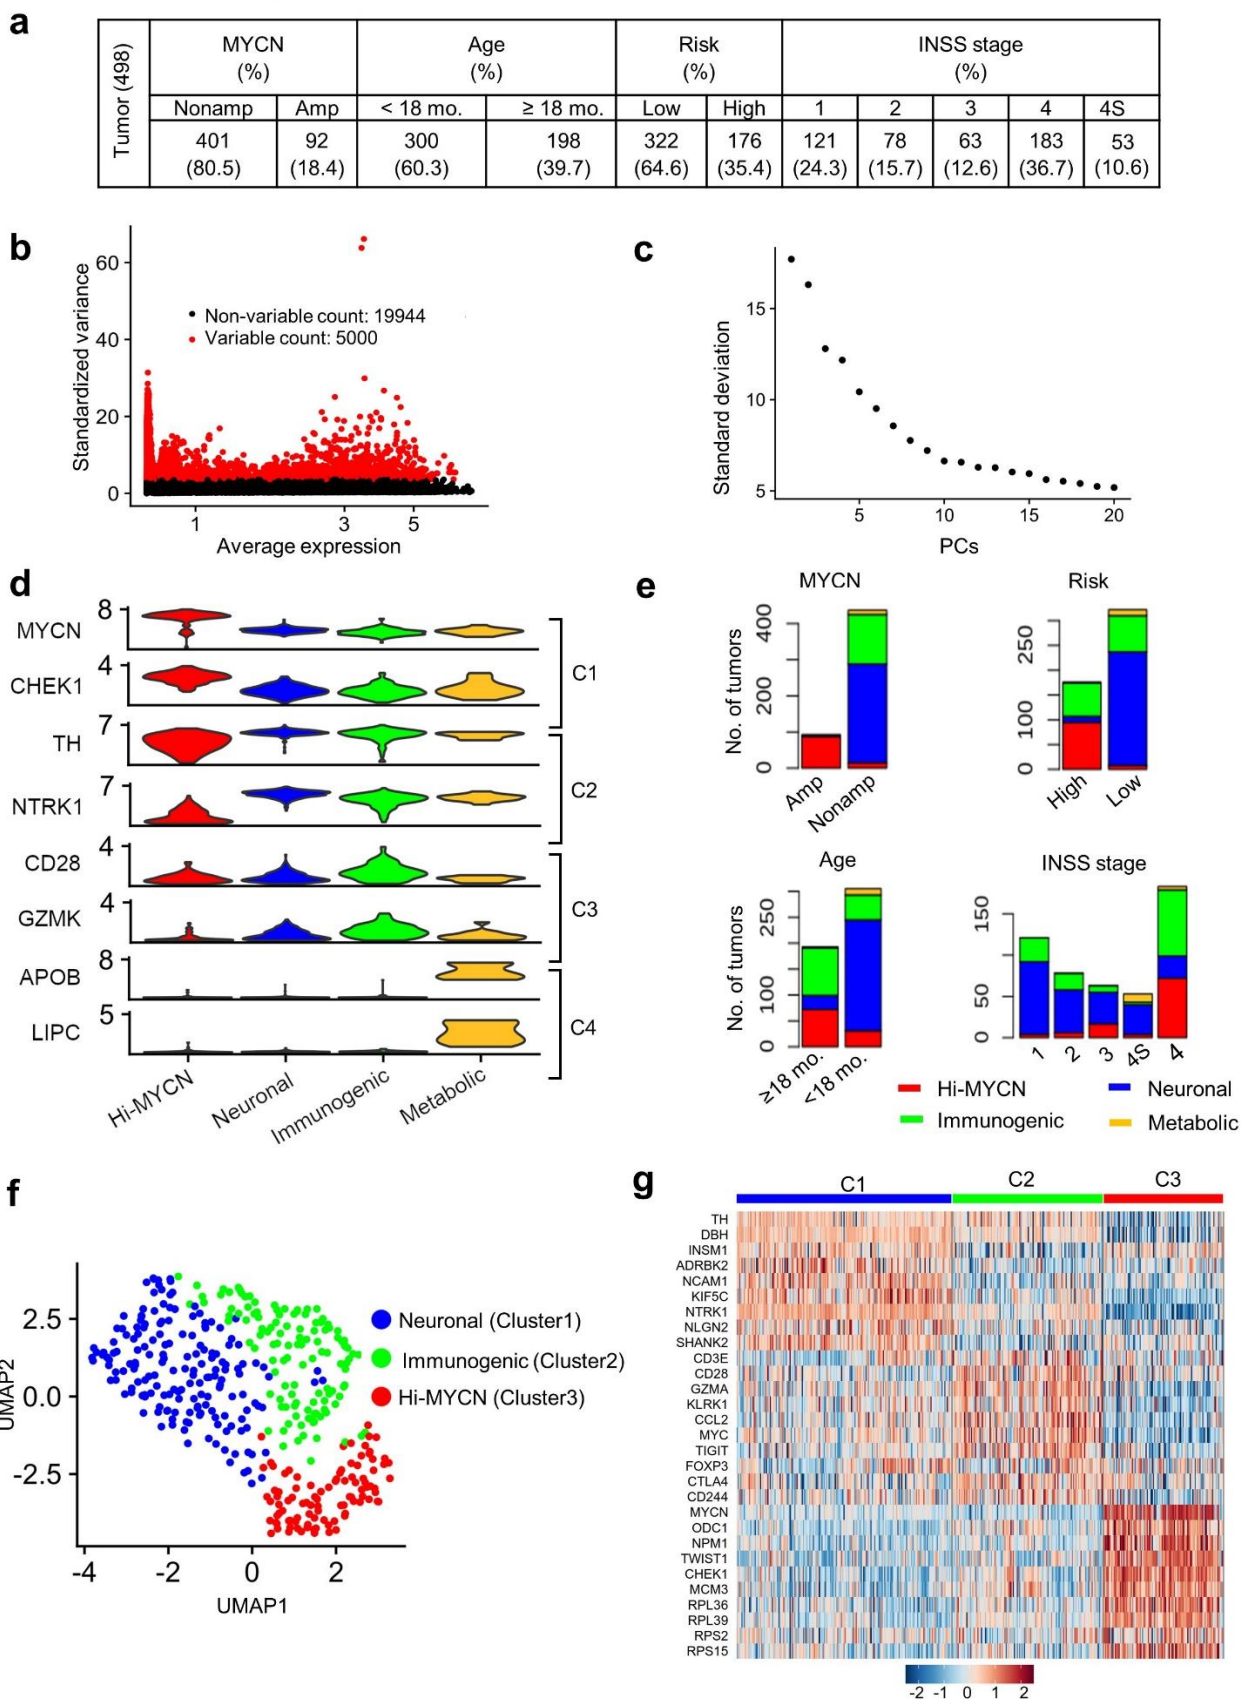



136 **Supplementary Fig. 1. Tumors within the immunogenic cluster express both immune**  
137 **activation and evasion markers. (a)** Distribution of the 498 primary NB tumors in the data set  
138 (SEQC-498; GSE49711) within the indicated prognostic categories. **(b)** Scatter plot of the  
139 standardized variance in expression of all protein coding genes within 498 tumors. Red dots  
140 indicate the top 5000 variably expressed genes. **(c)** Elbow plot representing the percentage  
141 variance for the top 20 principal components, PCs. **(d)** Violin plots showing the expression of  
142 representative marker genes across the four clusters. **(e)** Stacked bar plots showing the  
143 distribution of tumors within the defined prognostic features within each cluster. Amp, amplified;  
144 Nonamp, nonamplified. **(f)** Two-dimensional UMAP representations of the gene expression  
145 profiles in 394 NB tumors (GSE120572). Each dot represents a tumor. The top 3000 highly  
146 variable genes were selected based on the variance-stabilizing method<sup>34</sup> and the 20 significant  
147 principal components (PCs) selected and processed in UMAP to generate three clusters  
148 representing three NB subtypes. The DEGs were identified for each cluster using the receiver  
149 operating characteristics (ROC) curve to compare one cluster with other two ( $\log_2$  FC > 0.25). **(g)**  
150 Heat map of expression values of 10 representative DEGs within each cluster. Rows are z-score  
151 scaled average expression levels for each gene in all three clusters.  
152

## Supplementary Fig. 2.

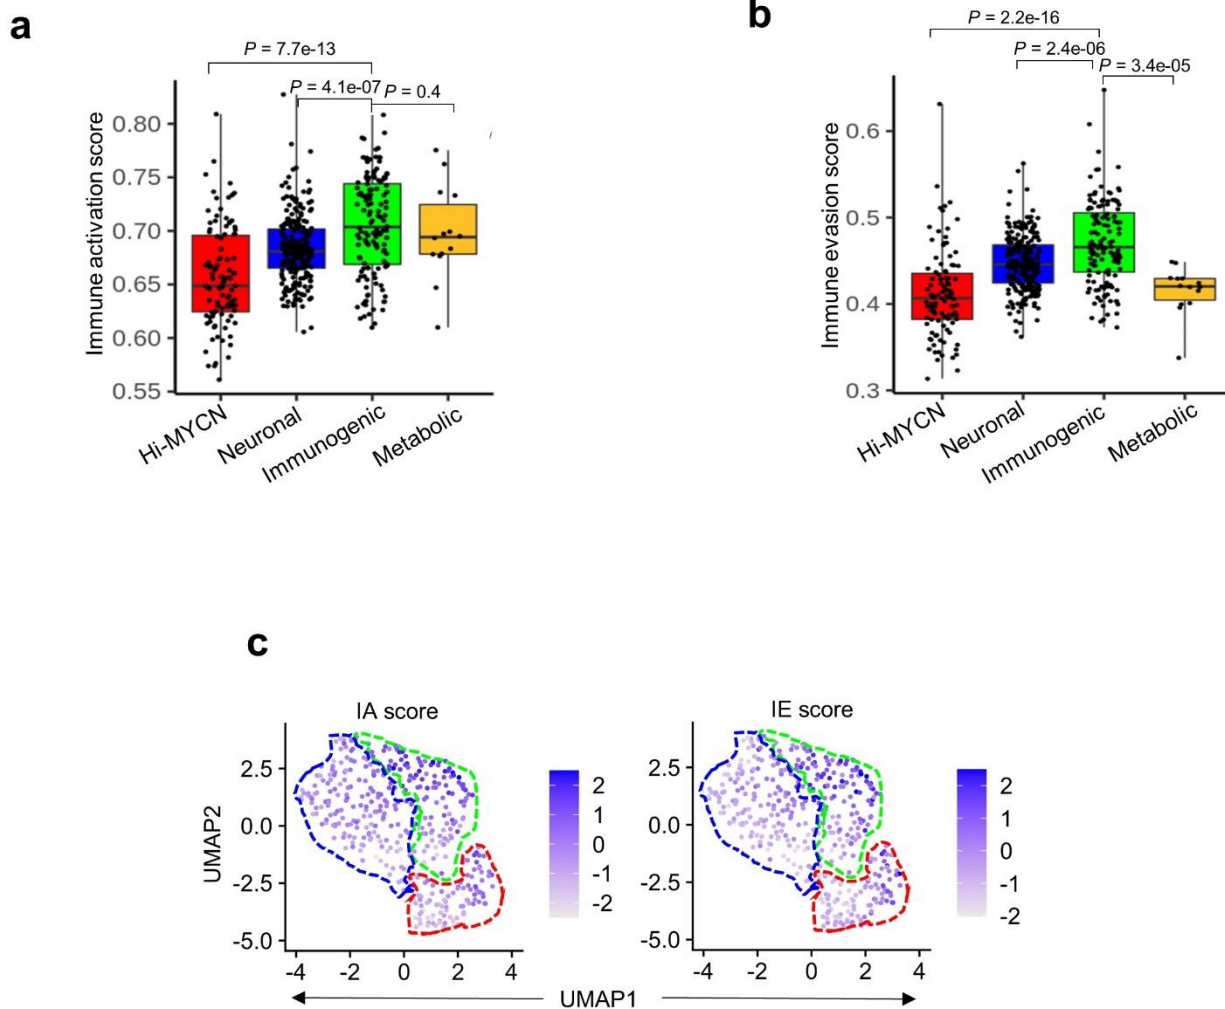

153 **Supplementary Fig. 2. The immunogenic tumors are associated with markers of both**  
154 **immune activation and evasion. (a, b)** Box plots comparing immune activation **(a)** and evasion  
155 **(b)** scores within the four clusters from the SEQC-498 tumor data set. All box plots are defined  
156 by center lines (medians), box limits (25<sup>th</sup> and 75<sup>th</sup> percentiles), whiskers (minima and maxima;  
157 the smallest and largest data range). Significance was determined by the Wilcoxon rank-sum test.  
158 **(c)** UMAP visualization of the distribution of IA and IE scores among the three tumor clusters  
159 derived from the 394 NBs in the GSE120572 dataset. Color bar represents normalized z-scores.  
160 Values <2.5 and >2.5 were set to -2.5 and +2.5 respectively, to reduce the effects of extreme  
161 outliers.  
162

163 development **Fig. 1a-c; Supplementary Fig. 1d**). Cluster 3 (C3, n = 140), accounting for 28%  
164 of the tumors, was enriched for tumors whose DEGs were involved in immune function, such as  
165 interferon-gamma (IFN- $\gamma$ ) response and T cell inflammation and activation, and hence were  
166 designated *immunogenic* (**Fig. 1a-c; Supplementary Fig. 1d**). Cluster 4 (C4; n=14; 3%) was  
167 clearly distinct from the other three clusters, and largely consisted of the spontaneously  
168 regressing stage 4S tumors that were predominantly enriched for genes involved in fatty acid and  
169 cholesterol homeostasis and hence were termed *metabolic* (**Fig. 1a-c; Supplementary Fig. 1d**).  
170 The neuronal and metabolic tumors arose predominantly in children <18 months of age, were of  
171 stages 1-3 and 4S, while the tumors within the immunogenic cluster were associated with patient  
172 age  $\geq$ 18 months and metastatic disease (n= 66; 47%) (**Fig. 1d; Supplementary Fig. 1e**). Thus,  
173 our DEG-based analysis of almost 500 tumors categorized neuroblastoma into four largely distinct  
174 groups that included a distinct subset, accounting for approximately one-third of the entire cohort,  
175 whose gene expression profiles were closely linked to immune responsiveness. To ensure that  
176 these results were not confined to one data set, we analyzed an independent data set of 394  
177 tumors (GSE120572) using similar clustering methods. This cohort also segregated into *Hi-*  
178 *MYCN*, *neuronal* and *immunogenic* clusters, again denoting the presence of immune response  
179 gene expression in a subset of primary neuroblastomas, the majority of which lack MYCN  
180 amplification (**Supplementary Fig. 1f, g**).

181  
182 To pursue the immune genes that were differentially enriched in the immunogenic cluster, we  
183 generated an immune activation (IA) score based on the relative expression of a curated set of  
184 41 genes known to have major roles in tumor cell-intrinsic immune functions, such as regulation  
185 of MHC expression, antigen processing and presentation, NK cell recognition and T and NK cell  
186 infiltration (**Supplementary Table 3**). After assigning an IA score to each of the *MYCN-*  
187 nonamplified tumors (n = 401) in the SEQC-498 data set and arranging them in ascending order  
188 (**Supplementary Table 4**), we observed that a significant number with the highest IA scores

189 predominantly fell within the immunogenic and metabolic clusters (**Fig. 1e; Supplementary Fig.**  
190 **2a**), while those with intermediate or lower scores were associated with the neuronal and Hi-  
191 MYCN clusters, respectively (**Fig. 1e; Supplementary Fig. 2a**). Because a cytotoxic immune  
192 response is generally accompanied by immune suppression or evasion<sup>35,36</sup>, we determined  
193 whether immune suppression was also represented in the *MYCN*-nonamplified tumors by ranking  
194 them in ascending order of an immune evasion (IE) score based on the relative expression of 19  
195 genes, most of which were markers of T-cell dysfunction (**Supplementary Table 3**). Again, the  
196 immunogenic tumor cluster had significantly higher IE scores compared with the neuronal and  
197 metabolic clusters (**Fig. 1f; Supplementary Fig. 2b**). Moreover, we observed enrichment for IA  
198 and IE scores in the immunogenic cluster in the additional data set (GSE120572)  
199 (**Supplementary Fig. 2c**), thus strengthening our premise that these tumors maybe capable of  
200 eliciting an immune response.

201  
202 Consistent with the known poor immunogenicity of *MYCN*-amplified tumors<sup>24,25</sup>, we also  
203 observed that tumors within the Hi-MYCN cluster had, on the whole, the lowest IA and IE scores  
204 (**Supplementary Fig. 2a, b**). Surprisingly, however, a small subset within this cluster had scores  
205 that were comparable to the highly immunogenic tumors within the immunogenic cluster [13 of  
206 103 (12.6%) above the median for immunogenic tumors] (**Supplementary Fig. 2a, b**). Thus, while  
207 the majority of neuroblastomas do not possess an immune response gene signature, a subset  
208 has significantly increased expression of both immune activation and evasion markers, pointing  
209 to their ability to induce an anti-tumor immune response.

210  
211 **The mesenchymal lineage is preferentially associated with immune response signatures**  
212 **in neuroblastoma**

213 Having identified subsets of neuroblastomas with the potential for immunogenicity, we next sought  
214 a biomarker that might consolidate the complex interactions between the immune system and the



215 tumor. To this end, we performed a modular gene co-expression analysis of the 140  
216 transcriptomes within the immunogenic cluster in the SEQC-498 data set to identify biologically  
217 relevant pathways based on similar gene expression patterns. Using the CEMiTool (co-  
218 expression modules identification tool) package (Russo et al., 2018), we identified five gene co-  
219 expression modules (M1-M5) within the immunological cluster (**Supplementary Fig. 3a**). Among  
220 these modules, M1, with the highest number of co-expressed genes, contained gene sets  
221 enriched for epithelial to mesenchymal transition (EMT), inflammatory response, and interferon  
222 signaling, suggesting an association between EMT and the preponderant representation of  
223 immune marker genes within the immunogenic cluster (**Fig. 2a; Supplementary Fig. 3b**).  
224 Furthermore, integration of the co-expression data in module M1 with protein–protein interaction  
225 data from the STRING 11.0 database identified mesenchymal lineage and immune markers as  
226 top regulatory hubs (**Fig. 2b**), leading us to hypothesize that in neuroblastoma, tumor  
227 immunogenicity could be determined by cell state.

228  
229 Two independent groups<sup>37,38</sup> recently described two distinct cell states in neuroblastoma: a  
230 differentiated sympathetic neuron-like adrenergic (ADR) phenotype, defined by lineage markers  
231 including *PHOX2B*, *DBH*, and *TH*, and a mesenchymal (MES) phenotype, characterized as  
232 “neural crest cell-like” (NCC), and expressing genes such as *PRRX1*, *FOSL1*, and *FOSL2*. To  
233 test our prediction, we first quantified the adrenergic and mesenchymal identities of each tumor  
234 in our cohort based on the expression levels of the lineage-specific genes in each cell state as  
235 established by Groningen et al<sup>38</sup> (see Methods). We ensured that there was no overlap between  
236 the 369-gene adrenergic signature and the genes that made up the IA data set and removed the  
237 6 IA genes that were also present in the 485-gene mesenchymal signature. Next, we assigned  
238 either an adrenergic (A-score) or a mesenchymal (M-score) score to each tumor within our four  
239 previously identified clusters. This analysis revealed significant enrichment of the mesenchymal  
240 cell state within the immunogenic and metabolic clusters (**Fig. 2c; Supplementary Fig. 3c**).



241 **Fig. 2. The mesenchymal cell state is associated with an immunogenic signature in NB. (a)**  
242 GO analysis of co-expressed genes associated with module M1 using the KEGG (Kyoto  
243 encyclopedia of genes and genomes) database. The vertical dashed line indicates the adjusted  
244 *P*-value of 0.05. **(b)** Gene network representing all possible interactions in module M1. The  
245 topmost connected genes (hubs) are indicated. Hubs derived from module M1 are colored blue  
246 (co-expression) and those from the STRING database are indicated in red (interaction). The size  
247 of each node corresponds to the degree of interaction. **(c)** UMAP visualization of the distribution  
248 of adrenergic (top) and mesenchymal scores (bottom) among the four tumor clusters. Color bar  
249 represents normalized z-scores. Values <2.5 and >2.5 were set to -2.5 and +2.5 respectively, to  
250 reduce the effects of extreme outliers. **(d)** Dot plots showing the distribution of *MYCN*-  
251 nonamplified tumors (*n* = 400) within each of the clusters based on ranked M-A scores. *Left*,  
252 Tumors from the upper (high M-A) and lower (low M-A) M-A score quartiles are shown (*n* = 200;  
253 *P* < 0.01 for C3). *Right*, Representations based on the median M-A scores of the entire tumor  
254 cohort (*n* = 400; *P* = 0.05 for C3). Fisher's exact test was used for both calculations. **(e)** *Left*,  
255 Heatmap representation of the expression of tumor cell-intrinsic immune activation genes in  
256 *MYCN*-amplified tumors (*n*=92). Samples are ranked by increasing M-A score. Log<sub>2</sub> gene  
257 expression values were z-score transformed for heatmap visualization. *Right*, Violin plots of the  
258 distribution of immune activation scores in the tumors on the left, classified either as adrenergic  
259 or mesenchymal, based on the median M-A score. The box plots within the violin plots are defined  
260 by center lines (medians), box limits (25<sup>th</sup> and 75<sup>th</sup> percentiles), whiskers (minima and maxima;  
261 1.5X the interquartile range). Significance was determined by the two-sided Kolmogorov-Smirnov  
262 (KS) test. APM, antigen processing machinery. **(f)** Violin plots comparing the quantitative scores  
263 of the indicated immune cell signatures in 100 tumors from the upper (mesenchymal) and lower  
264 (adrenergic) quartiles of the tumor M-A scores using the two-sided KS test. The box plots within  
265 the violin plots are defined as in (D). **(g)** *Left*, Bar diagram comparing regression coefficient ( $\beta$ )  
266 values derived from multivariate multiple regression model analysis of *MYCN*-nonamplified

267 tumors.  $\beta$ -coefficient values were compared between three predictors: MYC score, M-A score and  
268 MYCN signature. IA, IE, T cell, cytotoxic cell and NK cell scores were used as response variables  
269 to generate the model<sup>39</sup>. *Right*, Heat map of the *P*-values associated with the three predictors. **(h)**  
270 Bar diagram comparing the CIBERSORT-estimated fractional content of the indicated tumor-  
271 infiltrating leukocytes between *MYCN*-nonamplified adrenergic and mesenchymal tumors.  
272 Adrenergic and mesenchymal tumors were assigned as in **(f)**. Data represent the means, n = 100  
273 tumors, \**P* < 0.05, \*\**P* < 0.01, \*\*\**P* < 0.001 two-tailed Welch's t-test.

### Supplementary Fig. 3.

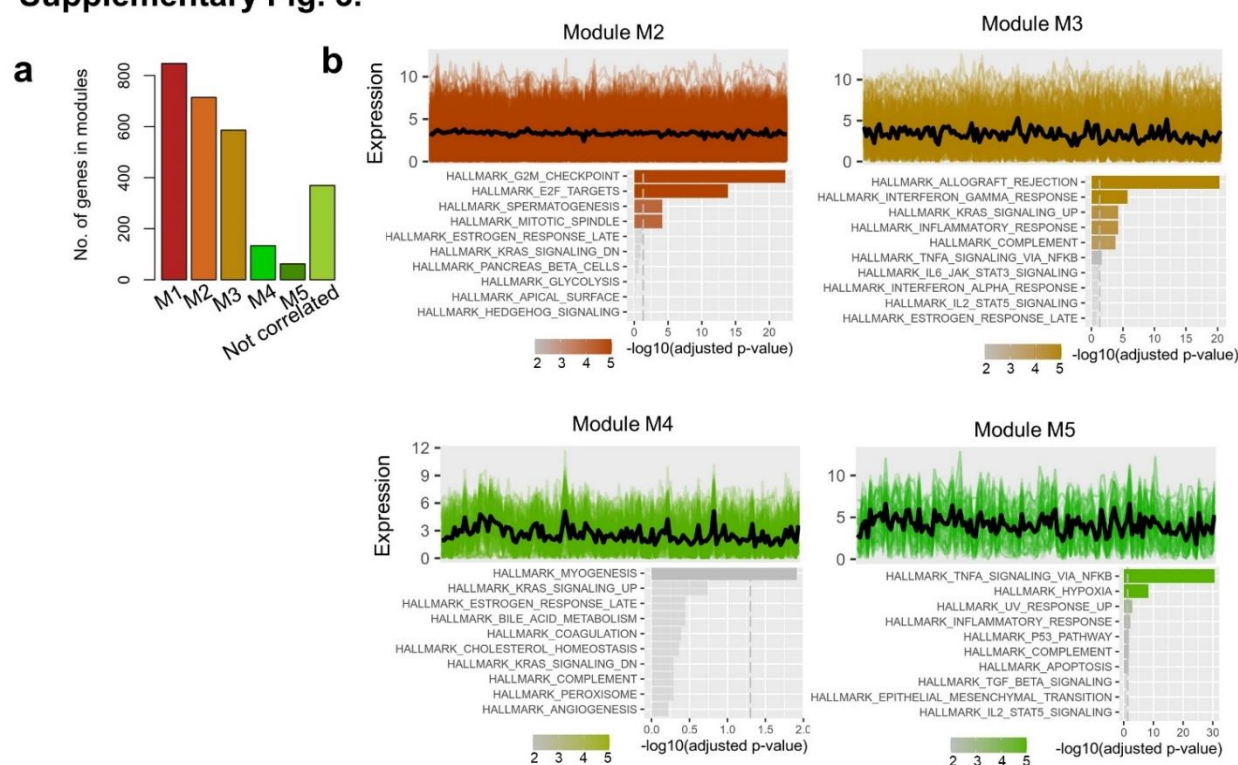

**c**

| Lineage (no of genes) | Hi-MYCN (2859) ( <i>P</i> -value) | Neuronal (1416) ( <i>P</i> -value) | Immunogenic (2213) ( <i>P</i> -value) | Metabolic (2043) ( <i>P</i> -value) |
|-----------------------|-----------------------------------|------------------------------------|---------------------------------------|-------------------------------------|
| Adrenergic (369)      | 121 (<0.001)                      | 78 (<0.001)                        | 16 (n.s.)                             | 13 (n.s.)                           |
| Mesenchymal (479)     | 46 (n.s.)                         | 31 (n.s.)                          | 129 (<0.001)                          | 156 (<0.001)                        |

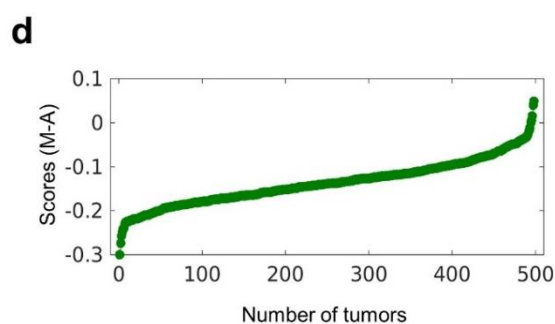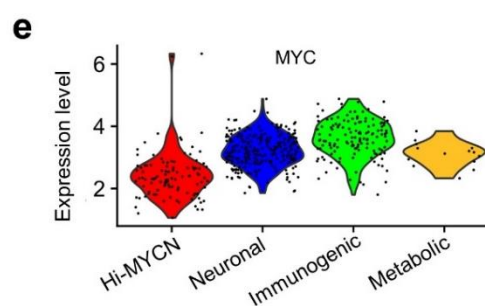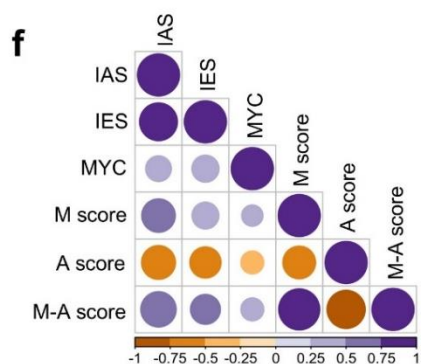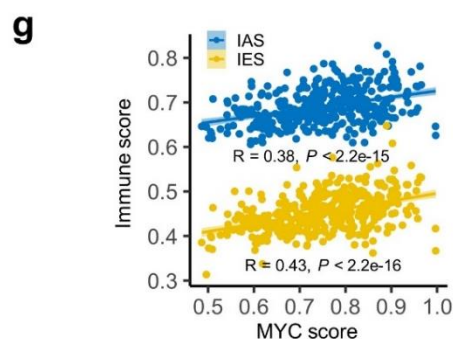



274 **Supplementary Fig. 3. Cell lineage markers are significantly associated with immune gene**  
275 **signatures in NB. (a)** Bar plots representing the numbers of co-expressed genes within each  
276 module. **(b)** Profile plots depicting the expression levels (y-axis) of individual genes (colored lines)  
277 and their mean expression (black line) in 140 tumors (x-axis) from modules M2, M3, M4 and M5.  
278 GO analysis of co-expressed genes associated with each module using the KEGG database is  
279 appended below the respective profile plot. The vertical dashed line indicates the adjusted *P*-  
280 value of 0.05. **(c)** Summary of the overlap between the DEGs associated with the four tumor  
281 clusters and the adrenergic or mesenchymal signature genes as per Groningen et al., 2017.  
282 Significance was determined by Fisher's exact test. **(d)** Scatter plot of the 498 primary NB tumors  
283 ranked based on increasing M-A score. **(e)** Violin plots of the distribution of normalized expression  
284 levels of MYC in the four tumor clusters. **(f)** Pearson correlation matrix showing pairwise  
285 correlation values among the indicated parameters. The colors and sizes of the circles indicate  
286 the correlation coefficient values, with the least (smaller, orange circles) to the most (larger, blue  
287 circles) degree of association between the parameters shown. **(g)** Scatter plot of the correlation  
288 between MYC expression and immune activation (blue dots) or evasion (yellow dots) scores in  
289 *MYCN*-nonamplified tumors.  
290

Supplementary Fig. 4.

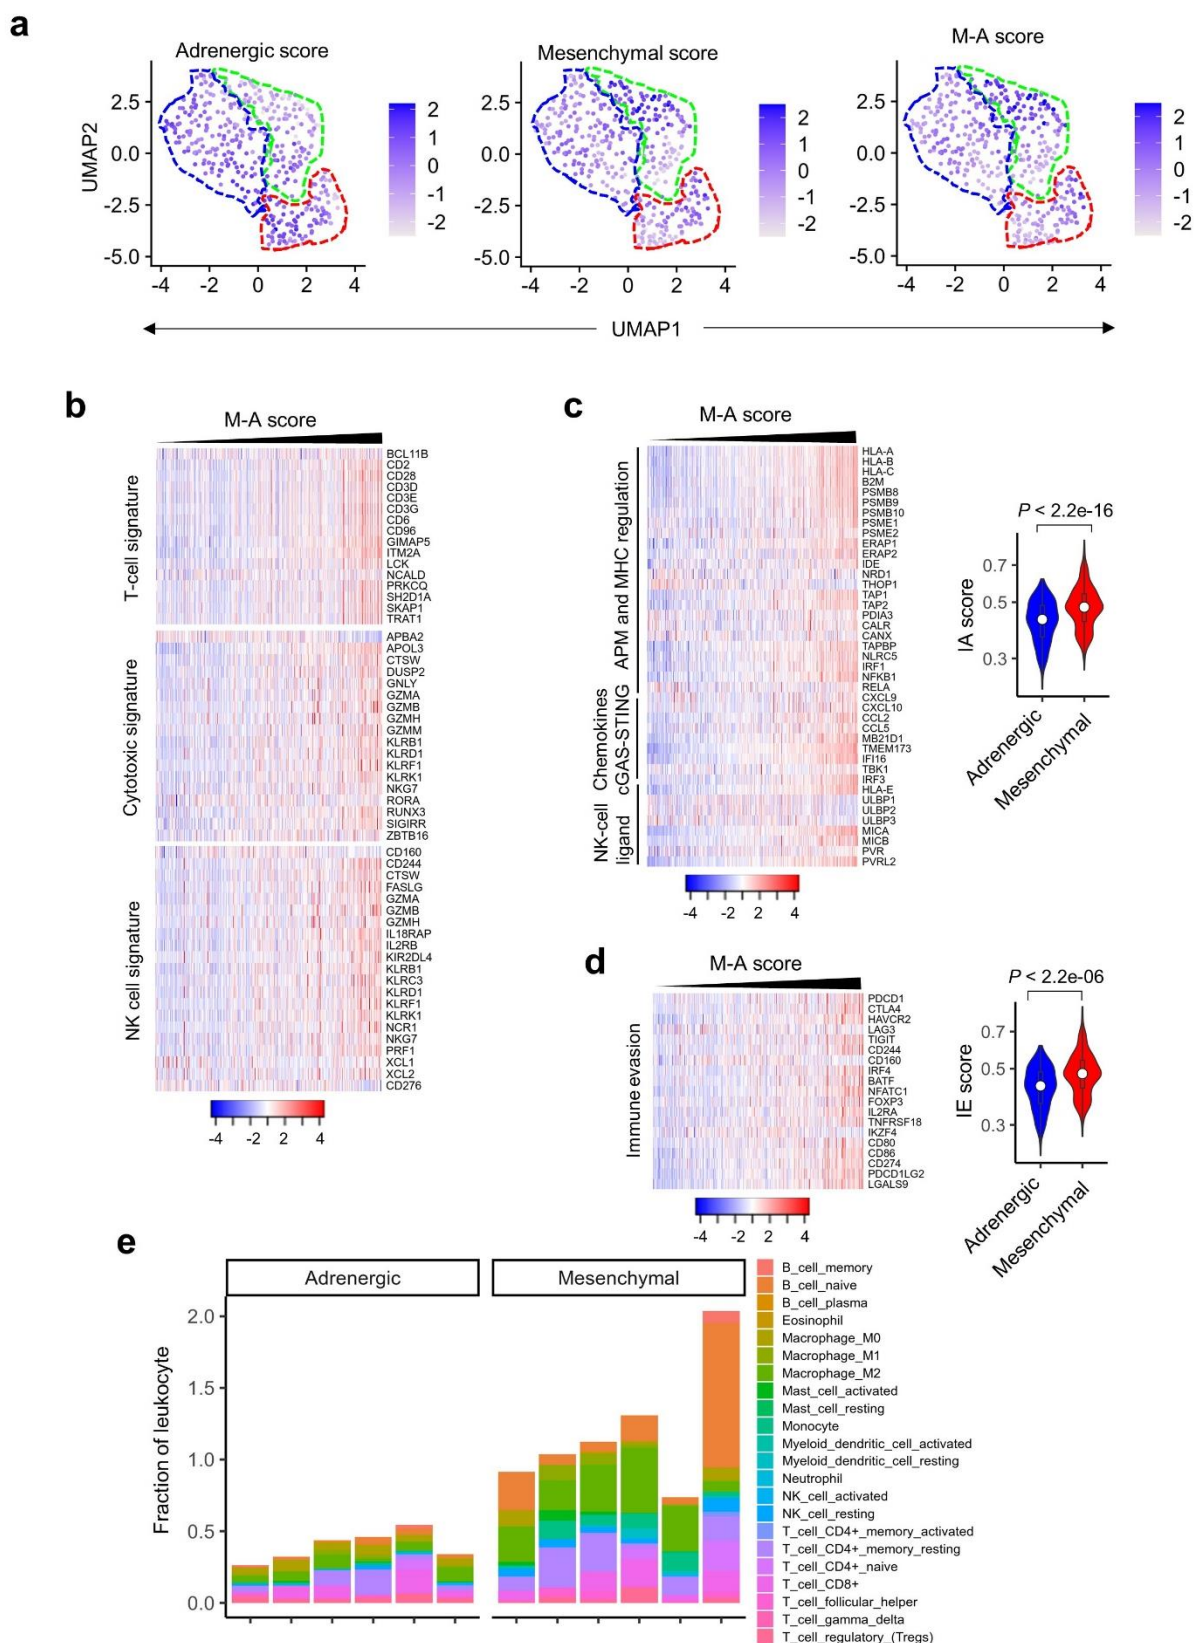

291 **Supplementary Fig. 4. The relative mesenchymal score (M-A score) is positively correlated**  
292 **with an immunogenic signature. (a)** UMAP visualization of the distribution of adrenergic,  
293 mesenchymal, and M-A scores among the three tumor clusters derived from 394 NBs in the  
294 GSE120572 dataset. Color bar represents normalized z-scores. Values <2.5 and >2.5 were set  
295 to -2.5 and +2.5 respectively, to reduce the effects of extreme outliers. **(b)** Heat maps of the  
296 indicated immune cell signatures in *MYCN*-nonamplified tumors, ranked by increasing M-A  
297 scores. Log<sub>2</sub> gene expression values were z-score transformed for heatmap visualization. **(c, d)**  
298 Heatmaps depicting the immune activation **(c)** and evasion **(d)** signatures in *MYCN*-nonamplified  
299 tumors, ranked by increasing M-A score. Log<sub>2</sub> gene expression values were z-score transformed  
300 for visualization. Violin plots comparing the distribution of immune activation **(c)** and evasion **(d)**  
301 signatures in 100 tumors from upper (mesenchymal) and lower (adrenergic) quartiles of the M-A  
302 score are shown next to the heatmaps. Significance determined by the two-sided KS test. Box  
303 plots within the violin plots are defined by center lines (medians), box limits (25<sup>th</sup> and 75<sup>th</sup>  
304 percentiles), whiskers (minima and maxima; 1.5X the interquartile range). **(e)** Bar graph  
305 comparing the CIBERSORT-estimated fractional content of the indicated tumor-infiltrating  
306 leukocytes in six tumors with the uppermost (mesenchymal) and lowermost (adrenergic) M-A  
307 scores.

308 By contrast, the Hi-MYCN and neuronal clusters were enriched for the adrenergic cell state (**Fig.**  
309 **2c; Supplementary Fig. 3c**).

310 Next, to identify predictors of immunogenicity among the *MYCN*-nonamplified tumors, we  
311 calculated the relative mesenchymal score for each tumor by subtracting the adrenergic from the  
312 mesenchymal score (M-A score). This resulted in a continuum of low to high M-A scores,  
313 corresponding to a less mesenchymal to a more mesenchymal tumor state (**Supplementary Fig.**  
314 **3d**). To determine whether these cell states had any effect on immune response in the *MYCN*-  
315 nonamplified tumors, we determined whether the mesenchymal, adrenergic, or M-A scores  
316 correlated with our previously defined immune activation and evasion scores (**Fig. 1e, f**). We also  
317 tested the effect of *MYC*, one of the top differentially expressed genes in the immunogenic cluster  
318 (**Supplementary Fig. 3e**). *MYC* is overexpressed in approximately 10% of *MYCN*-nonamplified  
319 neuroblastomas<sup>40</sup> and regulates the expression of cell-intrinsic immune evasion markers in  
320 lymphoma<sup>41</sup>. Of these variables, the M-A score showed the strongest correlation with  
321 immunogenicity, not only in terms of the immune activation score ( $R = 0.71$ ), but also the immune  
322 evasion score ( $R = 0.51$ ) (**Supplementary Fig. 3f**). *MYC* expression was only modestly correlated  
323 with immune evasion and activation scores ( $R = 0.43$ ;  $R = 0.38$ , respectively) (**Supplementary**  
324 **Fig. 3g**). With no overlap between the lineage marker and immune response gene sets, these  
325 results suggest that the relative abundance of a mesenchymal signature (M-A score) is a better  
326 predictor of immune response than individual adrenergic or mesenchymal signatures. In  
327 agreement, tumors with high M-A scores were represented at a significantly higher proportion  
328 within the immunogenic cluster compared to tumors with low M-A scores (**Fig. 2d**), a result that  
329 was recapitulated in our second data set, (GSE120572) (**Supplementary Fig. 4a**). Finally, our  
330 finding of the subset of tumors marked by the relatively high expression of immune activation and  
331 evasion genes within the Hi-MYCN cluster (**Supplementary Fig. 2a, b**) prompted us to further  
332 evaluate the cell states of these tumors. Ranking these tumors based on increasing M-A scores  
333 revealed a positive relationship between cell-intrinsic immunogenicity and the mesenchymal state

334 **(Fig. 2e)**, suggesting that similar to our results in *MYCN*-nonamplified tumors, the presence of  
335 immune gene expression in *MYCN*-amplified tumors is significantly correlated with the  
336 mesenchymal phenotype.

337  
338 The preferential overexpression in the mesenchymal phenotype of tumor cell-intrinsic genes  
339 that induce a positive immune response (IA score), as well as its correlation with transcripts that  
340 suppress the immune response (IE score), suggested that these tumors may support increased  
341 immune cell infiltration. To test this prediction, we used two orthogonal approaches. First, we  
342 assessed whether established signatures of immune cell infiltration<sup>39,42</sup> were present in the  
343 tumors arranged according to increasing M-A scores, and observed enrichment for signatures of  
344 infiltrating immune cells in tumors with mesenchymal phenotypes **(Supplementary Fig. 4b)**.  
345 Intriguingly, we also noted that adrenergic tumors were enriched for CD276 (B7-H3) expression,  
346 an immune checkpoint marker that protects neuroblastoma cells from NK cell-mediated  
347 cytotoxicity, which may partly account for the decreased immune response signatures in these  
348 cells<sup>14</sup> **(Supplementary Fig. 4b)**. We next quantified the immune response signatures in a subset  
349 of tumors (n = 100) from both the upper and lower quartiles of the M-A score that had significant  
350 differences in their activation and evasion scores **(Supplementary Fig. 4c, d)**. High M-A scoring  
351 (mesenchymal) tumors had significantly higher expression levels of cytotoxic T and NK cell  
352 signatures compared with those of low M-A scoring (adrenergic) tumors **(Fig. 2f)**. Considering  
353 that the M-A score and, to a lesser extent, higher *MYC* expression were positively associated with  
354 IA and IE scores in pairwise testing **(Supplementary Fig. 3f)**, we next assessed their relative  
355 contributions as independent predictors of an immune response in a multivariate multiple  
356 regression model consisting of immune activation and evasion scores and T and NK cell  
357 signatures **(Fig. 2g)**. Because *MYCN* amplification is linked to immune suppression, we also  
358 included the 157-gene *MYCN* signature generated by Valentijn et al<sup>27</sup> and subsequently used by  
359 Wei et al to identify immune predictors in *MYCN*-nonamplified neuroblastoma<sup>25</sup>. In this analysis



360 also, the M-A score was a better predictor of tumor immunogenicity than *MYC* expression or  
361 *MYCN* signature (**Fig. 2g**).

362  
363 Second, we used CIBERSORT (Cell type Identification By Estimating Relative Subsets Of  
364 known RNA Transcripts)<sup>43</sup>, as a deconvolution approach to estimate the fraction of immune cell  
365 infiltration associated with the adrenergic and mesenchymal lineage tumors. We first established  
366 the fraction of tumor-infiltrating leukocytes (TILs) in the most mesenchymal versus the most  
367 adrenergic tumors (n = 6 each), observing significantly higher fractions in mesenchymal tumors  
368 (**Supplementary Fig. 4e**). Next, we quantified the average immune cell content in 100 tumors  
369 from the upper and lower quartiles of the M-A score (**Fig. 2h**). Consistent with our previous results  
370 (**Fig. 2f**), CIBERSORT analysis also showed significantly increased enrichment for cytotoxic CD8<sup>+</sup>  
371 T cells in mesenchymal tumors, which was also associated with a concomitant increase in  
372 regulatory T cells, including those expressing markers of T-cell exhaustion (**Fig. 2h**;  
373 **Supplementary Fig. 4e**). Interestingly, we also observed that mesenchymal tumors comprised a  
374 higher fraction of naïve B cells, which were recently shown to take part in antitumor immunity<sup>44</sup>  
375 (**Fig. 2h**; **Supplementary Fig. 4e**). Together, our findings indicate that the mesenchymal cell  
376 state is a strong predictor of neuroblastoma immunogenicity.

377  
378 **Tumor cell-intrinsic upregulation of immune pathways in mesenchymal neuroblastoma**

379 We next sought to understand the extent to which the presence or absence of an immunogenic  
380 signature in the bulk RNA-sequencing data was intrinsic to tumor cells or was conferred by the  
381 tumor microenvironment. Analysis of the lineage identities of a panel of 24 human neuroblastoma  
382 cell lines (15 *MYCN*-amplified; 9 *MYCN*-nonamplified) from RNA-sequencing data (GSE28019)  
383 revealed a gradient of adrenergic-to-mesenchymal scores (**Supplementary Fig. 5a**). Consistent

Fig. 3.

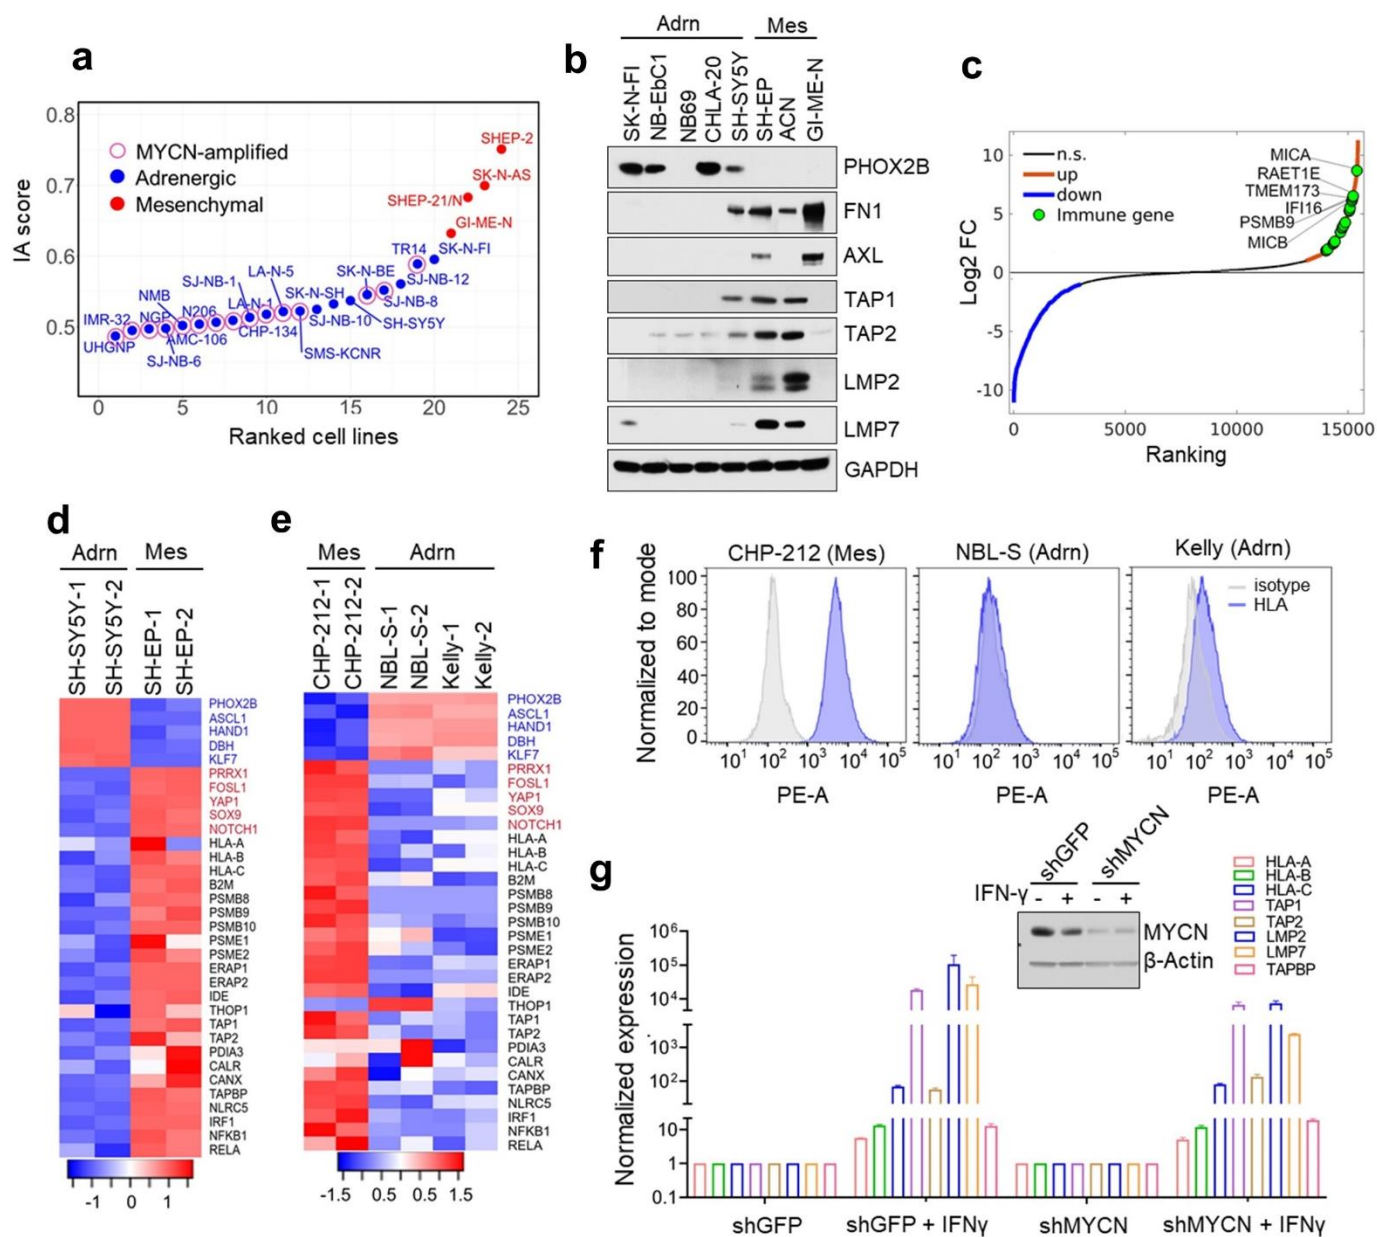

384 **Fig. 3. Tumor cell-intrinsic immune marker genes are upregulated in mesenchymal NBs.**  
385 **(a)** Scatter plot of the immune activation (IA) scores of human neuroblastoma cell lines (RNA-seq  
386 data; GSE28019). Cell lines are arranged based on increasing IA scores and designated as  
387 adrenergic or mesenchymal based on lineage-specific gene expression. **(b)** Western blot (WB)  
388 analysis of adrenergic (PHOX2B) and mesenchymal (FN1, AXL) cell lineage markers and antigen  
389 processing genes (TAP1/2, LMP2/7) in *MYCN*-nonamplified NB cell lines. GAPDH was used as  
390 the loading control. Adrn, adrenergic; Mes, mesenchymal. **(c)** Waterfall plot of the fold-change in  
391 RNA expression levels of up- and downregulated genes in SH-EP compared to SH-SY5Y NB  
392 cells; selected immune genes are highlighted in green. **(d, e)** Heat maps of lineage marker (*blue*,  
393 adrenergic; *red*, mesenchymal) and MHC and antigen processing machinery gene (*black*)  
394 expression in the indicated *MYCN*-nonamplified **(d)** and *MYCN*-amplified (CHP-212, Kelly) and  
395 overexpressing (NBL-S) **(e)** adrenergic and mesenchymal cells ( $n = 2$  biological replicates). Rows  
396 are z-scores calculated for each transcript in each cell type. **(f)** Fluorescence activated cell sorting  
397 (FACS) analysis of cell surface HLA expression in the cells depicted in **e**. Isotype controls are  
398 depicted in gray. The X-axis denotes fluorescence intensity of indicated proteins using  
399 phycoerythrin (PE-A) tagged antibodies. Results representative of 2 independent experiments.  
400 **(g)** RT-qPCR analysis of antigen processing and presentation genes in *MYCN*-amplified Kelly NB  
401 cells engineered to express shMYCN or shGFP (control) with or without IFN- $\gamma$  induction (100  
402 ng/mL for 24 hr.). Data are normalized to GAPDH and represent means  $\pm$  SD,  $n = 2$  biological  
403 replicates. Inset, WB analysis of MYCN in control and shMYCN cells. Actin was used as a loading  
404 control.

Supplementary Fig. 5.

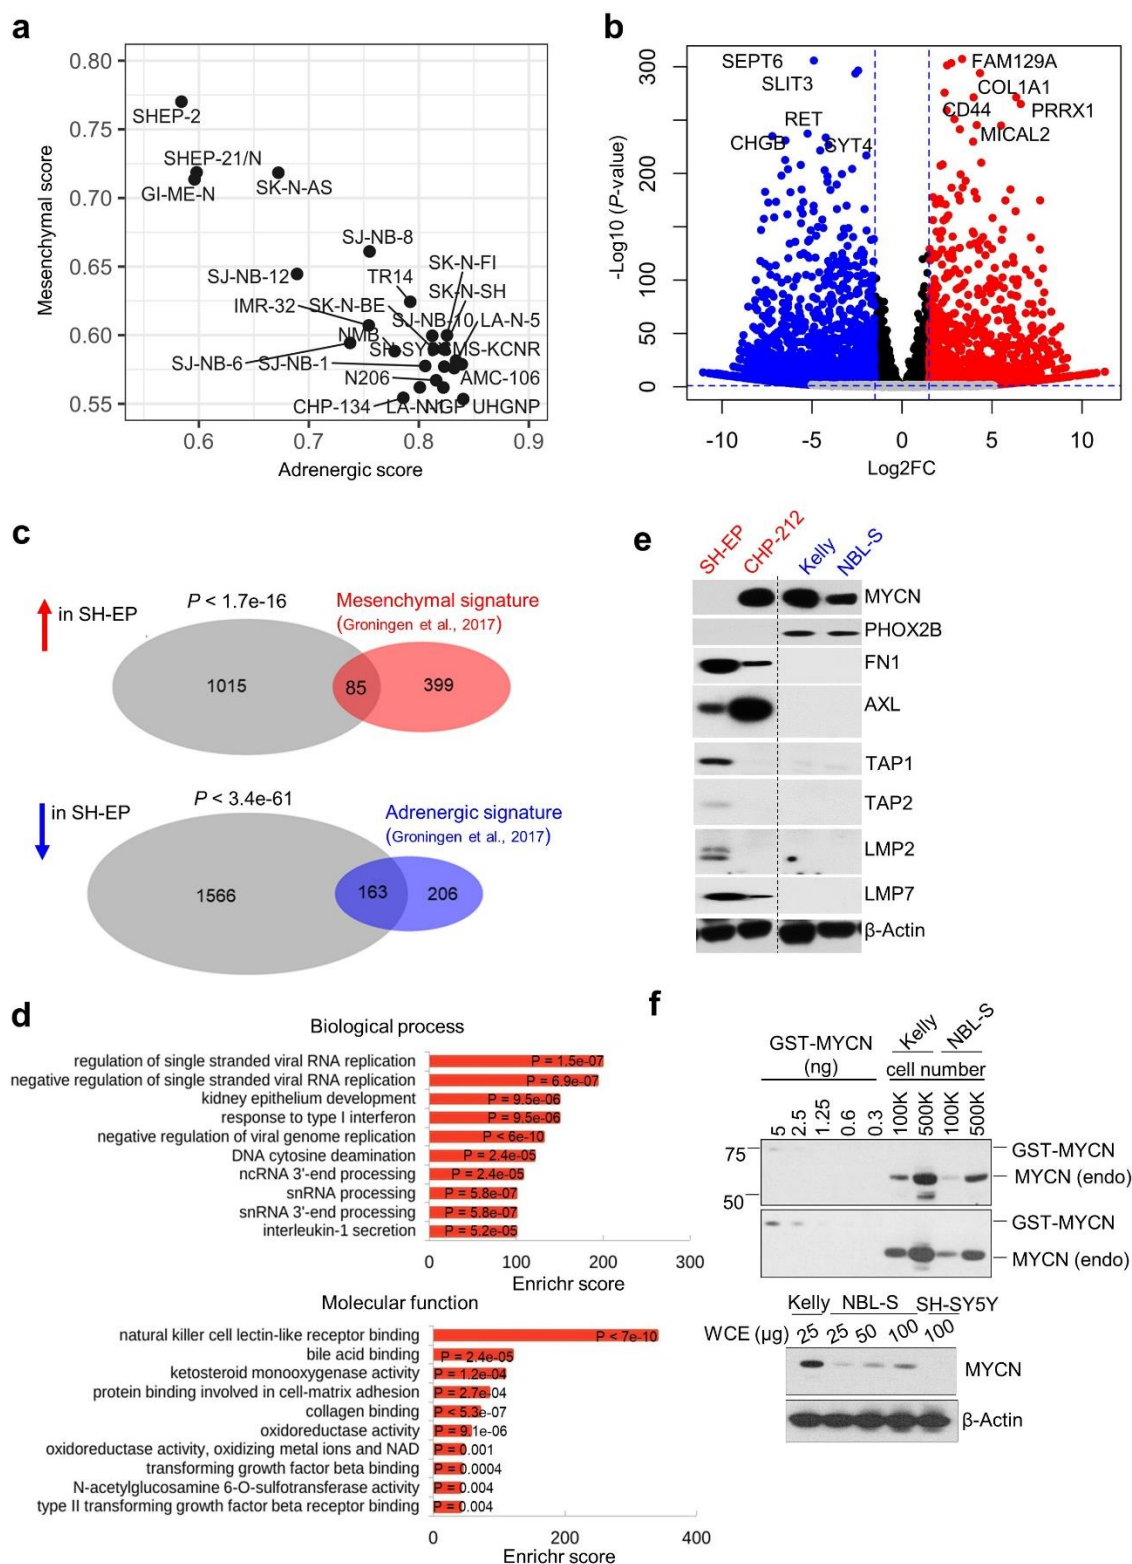

405 **Supplementary Fig. 5. Mesenchymal lineage-specific marker and cell-intrinsic immune**  
406 **gene expression are significantly correlated in NB. (a)** Scatter plot of adrenergic and  
407 mesenchymal scores in NB cell lines (GSE28019). **(b)** Volcano plot showing the gene expression  
408 changes between mesenchymal SH-EP and adrenergic SH-SY5Y cells. The top ten lineage  
409 marker genes are highlighted. The fold changes are represented in  $\log_2$  scale (X-axis) and the -  
410  $\log_{10}$  of the  $P$ -values depicted on Y-axis (FDR < 0.1 and  $\log_2FC > 1$ ). **(c)** Venn diagram of the  
411 overlap between DEGs in SH-EP cells (compared to SH-SY5Y cells) and the mesenchymal or  
412 adrenergic signatures derived from Groningen et al<sup>38</sup>. Statistical significance was determined  
413 using Fisher's exact test. **(d)** GO analysis of differentially upregulated genes in mesenchymal SH-  
414 EP compared to adrenergic SH-SY5Y cells. **(e)** WB analysis of cell lineage marker and antigen  
415 processing gene expression in the indicated NB cells. Dotted line indicates the margin where gel  
416 images have been cut. **(f) Upper**, WB analysis of MYCN levels in the indicated numbers of Kelly  
417 and NBL-S NB cells titrated against known amounts of purified GST-MYCN protein. *Lower*, WB  
418 analysis comparing MYCN levels in whole cell extracts (WCE) from Kelly cells to titrated levels  
419 from WCE in NBL-S cells. SH-SY5Y cells that do not express MYCN serve as a negative control.  
420 Actin was used as a loading control in **(e)** and **(f)**.

421 with our observations in primary tumors, cell lines with higher mesenchymal gene signatures  
422 grouped together and had significantly higher expression of tumor cell-intrinsic immune genes,  
423 compared with the remainder, which had higher adrenergic scores and were mostly associated  
424 with reduced immune marker gene expression (**Fig. 3a, b**). To further understand the association  
425 of tumor cell-intrinsic immune pathways with lineage state, we focused on two neuroblastoma cell  
426 lines –SH-SY5Y and SH-EP – subclones of the *MYCN*-nonamplified SK-N-SH cell line separated  
427 on the basis of neuroblastic versus substrate-adherent morphology<sup>45</sup> and determined to be  
428 adrenergic and mesenchymal<sup>38</sup>, respectively. RNA sequencing showed that the differentially up-  
429 and down-regulated genes in SH-EP compared with SH-SY5Y cells significantly overlapped with  
430 established signatures of mesenchymal and adrenergic states, thus confirming their respective  
431 phenotypes (**Supplementary Fig. 5b, c**). We noted that genes with roles in eliciting an immune  
432 response were among the top differentially upregulated genes in mesenchymal SH-EP cells,  
433 especially those involved in antigen processing and presentation and positive regulation of MHC  
434 expression (**Fig. 3c, d**). Moreover, gene ontology (GO) analysis of the upregulated transcripts  
435 revealed enrichment for innate and adaptive immune responses including type-I interferon  
436 signaling and ligands for the NK cell receptor, NKG2D (NK cell lectin-like receptor, KLRK1)  
437 (**Supplementary Fig. 5d**). By contrast, adrenergic SH-SY5Y cells that showed upregulation of  
438 neuronal lineage markers did not show significant enrichment of immune function genes (**Fig.**  
439 **3d**), providing further evidence that cell-intrinsic immunogenicity is associated with the  
440 mesenchymal phenotype.

441 The absence of a productive immune response has often been described in *MYCN*-  
442 amplified neuroblastoma tumors<sup>24,25</sup>; indeed, the vast majority of such tumors in our cohort  
443 exhibited similar findings (**Supplementary Fig. 2a, b**). Nonetheless, based on our intriguing  
444 finding of upregulation of immune response genes in a small number of *MYCN*-amplified tumors  
445 (**Supplementary Fig. 2a, b**) that possessed mesenchymal cell signatures (**Fig. 2e**), we sought  
446 to understand the role of *MYCN* in mediating this immune response. We used Kelly and CHP-212



447 human neuroblastoma cells that expressed amplified *MYCN* but were of adrenergic and  
448 mesenchymal phenotypes, respectively<sup>37,38</sup>, and NBL-S cells that lacked *MYCN* amplification but  
449 expressed moderate levels of *MYCN* RNA and protein<sup>46</sup> (**Supplementary Fig. 5e**) and were  
450 classified as adrenergic (van Groningen et al., 2017 and this study). RNA-sequencing and flow  
451 cytometry analysis suggested that tumor cell-intrinsic immune genes involved in antigen  
452 processing and MHC regulation were highly expressed in mesenchymal CHP-212 compared to  
453 adrenergic Kelly and NBL-S cells (**Fig. 3e, f; supplementary fig. 5e**). Importantly, although  
454 *MYCN* expression in NBL-S cells was lower than in Kelly cells (**Supplementary Fig. 5f**), these  
455 immune transcripts were expressed at lower levels in both cell lines, consistent with their  
456 adrenergic status (**Fig. 3e; Supplementary Fig. 5f**). To further verify that cell state dictate tumor  
457 cell-intrinsic immunogenicity, we depleted *MYCN* expression in Kelly cells and observed no  
458 significant change to the IFN- $\gamma$ -induced expression of HLA and antigen processing genes  
459 compared to control cells (**Fig. 3g**). Thus, our findings suggest that the lineage state of  
460 neuroblastoma cells specifies the expression of tumor cell-intrinsic immune marker genes.

461

### 462 **Cellular reprogramming to the mesenchymal state leads to increased immunogenicity**

463 We next questioned whether acquisition of the mesenchymal phenotype would be sufficient to  
464 render adrenergic neuroblastoma cells immunogenic. One of the top overexpressed genes in SH-  
465 EP mesenchymal cells, *PRRX1*, encodes a core lineage-specific homeobox transcription factor  
466 (TF), whose overexpression induces the mesenchymal state in neuroblastoma cells<sup>37,38</sup>  
467 (**Supplementary Fig. 5b**). We therefore overexpressed doxycycline-inducible *PRRX1* in  
468 adrenergic SH-SY5Y cells and observed a gradual loss of the adrenergic lineage marker  
469 *PHOX2B*, together with increased expression of the mesenchymal markers, fibronectin, vimentin  
470 and *AXL* (**Fig. 4a; Supplementary Fig. 6a**). By contrast, overexpression of DNA-binding mutants

**Fig. 4.**

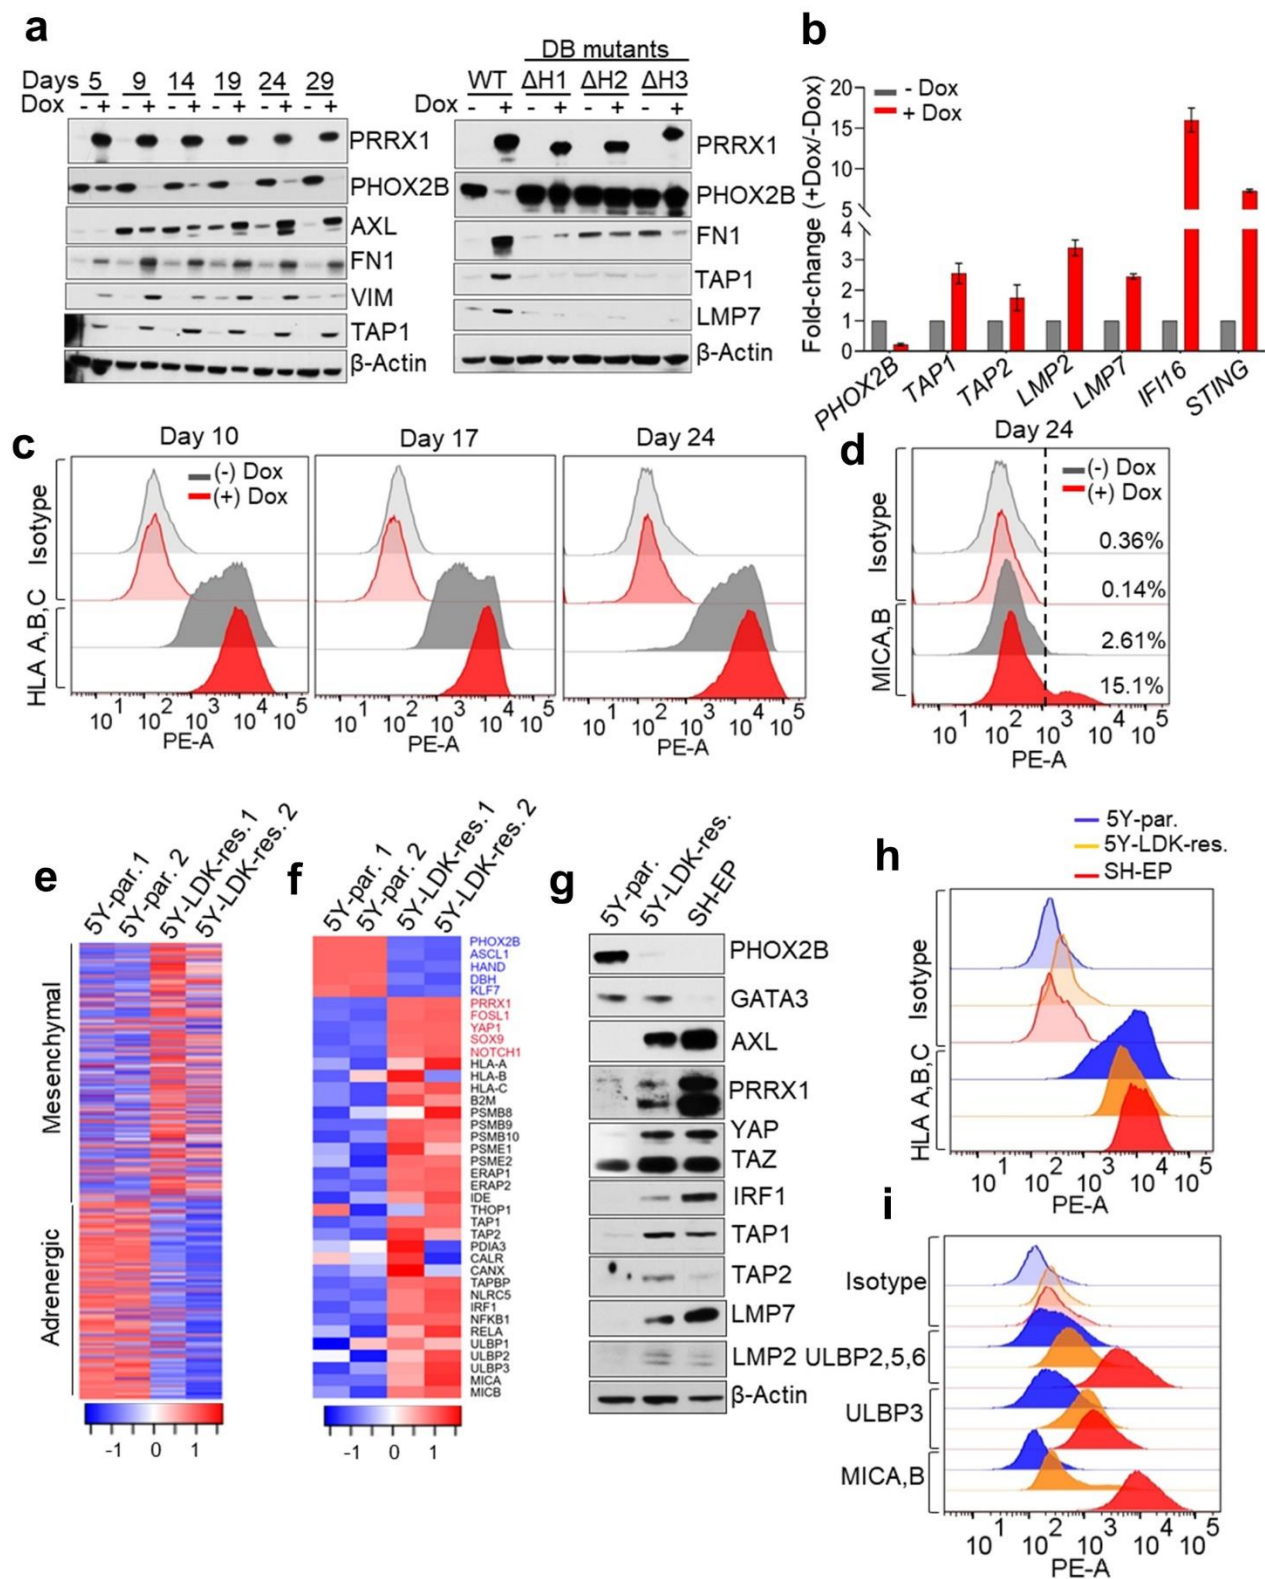

471 **Fig. 4. Reprogramming of adrenergic NB cells to the mesenchymal cell state leads to**  
472 **increased expression of immune response genes. (a)** *Left*, WB analysis of PHOX2B and  
473 antigen processing gene expression in adrenergic SH-SY5Y cells engineered to express  
474 doxycycline (dox)-inducible PRRX1 in the presence or absence of dox (200 ng/mL) at the  
475 indicated time points. *Right*, WB analysis of the indicated proteins in SH-SY5Y cells expressing  
476 dox-inducible wild-type (WT) or DNA-binding mutants of PRRX1 at 10 days post dox-induction.  
477 The DNA-binding (DB) mutants harbor individual deletions of the three  $\alpha$ -helices ( $\Delta$ H1,  $\Delta$ H2 and  
478  $\Delta$ H3) within the PRRX1 homeodomain. **(b)** RT-qPCR analysis of the indicated immune response  
479 genes in the same cells as in **(a)**. Data represent the means  $\pm$  SD,  $n = 2$  biological replicates. **(c)**  
480 FACS analysis of cell surface HLA expression following dox-inducible expression of PRRX1 in  
481 SH-SY5Y cells at the indicated time points. Data are representative of 2-3 independent  
482 experiments. **(d)** FACS analysis of cell surface MICA/MICB expression after PRRX1 induction for  
483 24 days in the same cells as in **(c)**. A logscale expression value of  $10^3$  was used as a threshold  
484 (vertical line) to gate MICA/MICB negative ( $<10^3$ ) and positive ( $\geq 10^3$ ) populations. Numbers on  
485 the right indicate the percentage of MICA/MICB-positive cells. Plots are representative of 2  
486 independent experiments. **(e)** Heat map representation of adrenergic and mesenchymal gene  
487 signatures in parental (5Y-par) and LDK-resistant (5Y-LDK-res) SH-SY5Y cells ( $n = 2$  biological  
488 replicates). Rows represent z-scores of  $\log_2$  expression values for each gene in both cell types.  
489 **(f)** Heat map depicting the expression of cell lineage markers (blue, adrenergic; red,  
490 mesenchymal), antigen processing machinery genes and NKG2D ligands (black) in parental and  
491 LDK-resistant SH-SY5Y cells ( $n = 2$  biological replicates). Rows represent z-scores of  $\log_2$   
492 expression values. **(g)** WB analysis of lineage marker and antigen processing gene expression in  
493 the indicated cells. Actin was used as a loading control in all immunoblots. **(h, i)** FACS analysis  
494 of cell surface HLA **(h)** and NKG2D ligand **(i)** expression in the indicated cells.

## Supplementary Fig. 6.

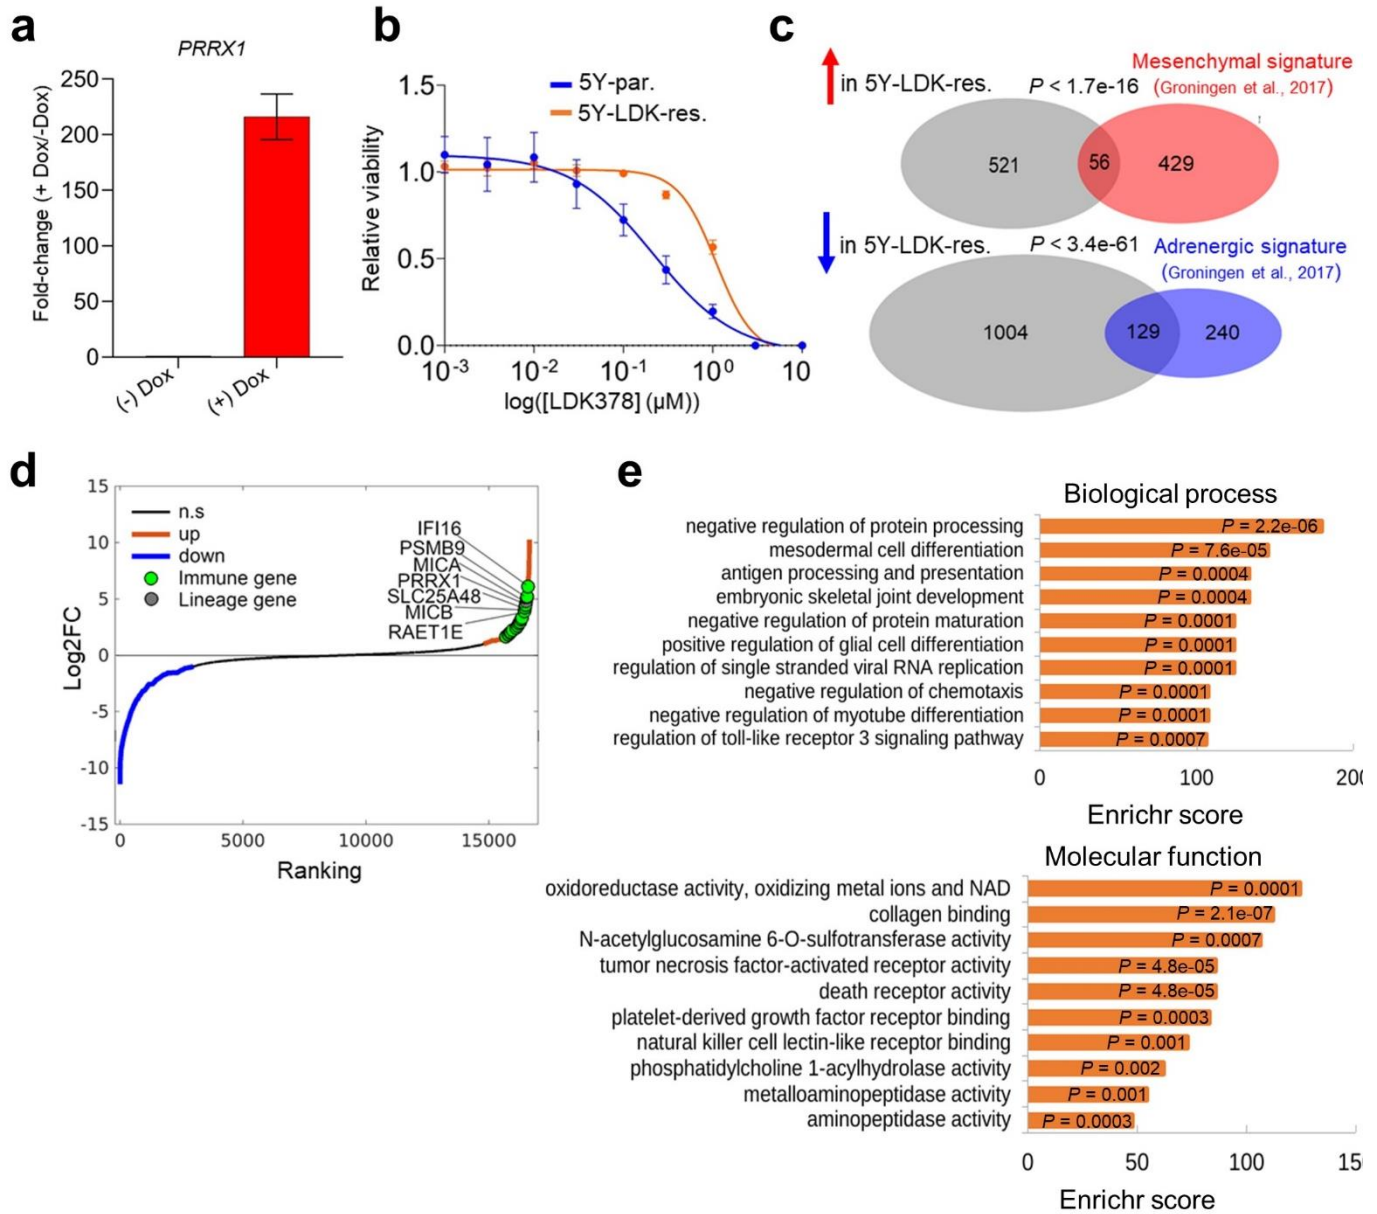

496 **Supplementary Fig. 6. Acquired resistance to ceritinib (LDK387) in adrenergic SH-SY5Y**  
497 **cells is associated with reprogramming to the mesenchymal lineage and increased**  
498 **expression of immune response genes. (a)** RT-qPCR analysis of PRRX1 expression in  
499 adrenergic SH-SY5Y cells engineered to express doxycycline (dox)-inducible PRRX1 in the  
500 presence or absence of dox (200 ng/mL) for 10 days. Data represent the means  $\pm$  SD,  $n = 2$   
501 biological replicates. **(b)** Dose–response curves of ceritinib (LDK378)-sensitive (5Y-par.) and -  
502 resistant (5Y-LDK-res.) SH-SY5Y cells treated with increasing concentrations of LDK378 for 72  
503 h. Data represent means  $\pm$  SD,  $n = 2$  biological replicates. **(c)** Venn diagrams depicting the overlap  
504 between the DEGs in LDK-resistant SH-SY5Y cells (compared to parental SH-SY5Y cells) and  
505 the mesenchymal or adrenergic signatures derived from Groningen et al<sup>38</sup>. *P*-values were  
506 determined by Fisher’s exact test. **(d)** Waterfall plot of the fold-change in RNA expression levels  
507 of up- and down-regulated genes in LDK-resistant SH-SY5Y cells compared to parental SH-SY5Y  
508 cells; selected immune genes are highlighted in green. **(e)** GO analysis of differentially  
509 upregulated genes in LDK-resistant SH-SY5Y compared to parental SH-SY5Y cells.

510 of *PRRX1* that contained homeodomain deletions had no effect on mesenchymal marker  
511 expression, indicating that the lineage switch was a direct consequence of *PRRX1*-mediated  
512 transcriptional control (**Fig. 4a**). Next, to determine whether the phenotypic switch had any effect  
513 on tumor cell-intrinsic pro-inflammatory pathways, we analyzed the expression of genes involved  
514 in antigen processing (*TAP1*, *TAP2*, *LMP2*, *LMP7*) as well as *IFI16* and *STING* (*TMEM173*),  
515 innate immune regulators that were differentially upregulated in mesenchymal NB cells (**Fig. 3c**).  
516 Induction of wild-type (WT) *PRRX1* led to increased RNA expression of these genes (**Fig. 4b**).  
517 Moreover, WT *PRRX1* but not its DNA-binding mutants led to increased *TAP1* and *LMP7* protein  
518 expression, which was accompanied by a sustained increase in cell surface MHC expression  
519 (**Fig. 4a, c**). Additionally, *PRRX1* induction led to increased cell surface expression of *MICA* and  
520 *MICB*, ligands for the activating NK cell receptor *NKG2D*, in a minor population of cells (**Fig. 4d**),  
521 in agreement with elevated expression of these proteins in mesenchymal neuroblastoma cells  
522 (**Fig. 3c**). These results suggest that conversion from the adrenergic to mesenchymal cell state  
523 may be adequate to reprogram immune-insensitive cells toward immunocompetency.

524 Transition from the adrenergic to the mesenchymal state in neuroblastoma is  
525 accompanied by resistance to chemotherapy<sup>38</sup>. Whether this transition in the face of treatment  
526 pressure might include the acquisition of a pro-inflammatory signature is unclear, leading us to  
527 compare adrenergic neuroblastoma cells that had gained mesenchymal features during the  
528 development of treatment resistance with their sensitive, adrenergic counterparts. For this  
529 purpose, we used an isogenic pair of cell lines comprising adrenergic SH-SY5Y neuroblastoma  
530 cells that express the *ALK*<sup>F1174L</sup> mutation and are sensitive to the small molecule inhibitor ceritinib  
531 (LDK378) (parental SH-SY5Y, IC<sub>50</sub> = 150 nM), and their ceritinib-resistant derivatives (LDK-  
532 resistant SH-SY5Y, IC<sub>50</sub> = 1101 nM) (**Supplementary Fig. 6b**)<sup>47</sup>. Comparison of the gene  
533 expression signatures of these cell lines revealed significant downregulation of adrenergic  
534 transcripts in LDK-resistant SH-SY5Y cells with concomitant upregulation of the mesenchymal



535 signature (**Fig. 4e**). Moreover, a significant overlap was noted between the differentially up- or  
536 downregulated transcripts in the LDK-resistant SH-SY5Y cells and established signatures of  
537 mesenchymal and adrenergic states, respectively (**Supplementary Fig. 6c**), suggesting that  
538 these cells had acquired features of the mesenchymal phenotype with resistance. Consistent with  
539 the key role of PRRX1 in triggering the conversion from an adrenergic to mesenchymal cell state,  
540 we observed that this TF was among the top upregulated genes in LDK-resistant SH-SY5Y cells  
541 (**Supplementary Fig. 6d**). The mesenchymal state of the LDK-resistant SH-SY5Y cells was  
542 further supported by the loss of the pivotal adrenergic marker, PHOX2B, and increased  
543 expression of additional mesenchymal markers AXL, YAP, TAZ, and IRF1, although these  
544 changes were not as pronounced as those in SH-EP mesenchymal cells that served as a positive  
545 control (**Fig. 4f, g**). Further evidence supporting the conversion to the mesenchymal state came  
546 from the differential upregulation in LDK-resistant SH-SY5Y cells of cell-intrinsic immune markers  
547 engaged in antigen processing and presentation and NK cell activating receptor ligands (PSMB9,  
548 MICA, MICB); in fact, these were among the top differentially upregulated genes in LDK-resistant  
549 SH-SY5Y cells (**Supplementary Fig. 6d, e; Fig. 4f, g**). These changes in immune genes  
550 coincided with increases in cell surface expression of MHC receptors to levels comparable to  
551 those in mesenchymal SH-EP cells (**Fig. 4h**), as well as the increased expression of ligands for  
552 the NK cell-activating receptor NKG2D (**Fig. 4i**). Thus, the genetic reprogramming from the  
553 adrenergic to the mesenchymal state that occurred with therapy resistance also led to the  
554 upregulation of tumor cell-intrinsic pro-inflammatory pathway genes suggesting that such  
555 conversion could render the tumor cells susceptible to recognition by T and NK cells.  
556

557 **Immune response gene expression during cell state transition is epigenetically regulated**

558 As lineage plasticity in neuroblastoma is epigenetically driven<sup>37,38,48,49</sup>, we next questioned  
559 whether the altered expression of immune response genes observed in the individual cell states  
560 could be the result of changes in chromatin organization. To this end, we analyzed the chromatin  
561 occupancies of active and repressive histone marks at immune genes that were upregulated in  
562 adrenergic SH-SY5Y cells upon induction of PRRX1 (**Fig. 4b**). Indeed, PRRX1 induction resulted  
563 in increased binding of the active H3K4me3 mark as well as loss of repressive H3K27me3 binding  
564 at several candidate immune genes, including the APM genes *TAP1* and *PSMB9* (**Fig. 5a**;  
565 **Supplementary Fig. 7a**). To understand epigenetic modifications that occur during the  
566 spontaneous transition between the two lineage states (as compared with forced expression of  
567 *PRRX1*) on a genome-wide basis, we compared histone occupancies between adrenergic  
568 (parental SH-SY5Y) cells and those that had acquired mesenchymal characteristics with drug  
569 resistance (LDK-resistant SH-SY5Y) (**Fig. 4e**), using SH-EP cells as a typical example of the  
570 mesenchymal state. ChIP-seq analysis of active H3K27ac binding identified that the super-  
571 enhancers (SEs) in LDK-resistant SH-SY5Y cells were associated with genes that conferred  
572 mesenchymal identity while parental SH-SY5Y cells retained SEs at genes that conferred  
573 adrenergic identity (**Supplementary Fig. 7b**), consistent with evidence that lineage plasticity is  
574 driven by cell type-specific SEs<sup>37,38</sup>. To determine whether the SE-mediated regulation of lineage  
575 genes also extended to genes associated with immune responsiveness, we analyzed the genes  
576 in our 41-gene immune activation signature (**Supplementary Table 3; Fig. 1e**) as well as those  
577 associated with an IFN-response signature (n = 91) in primary tumors and cell lines (**Fig. 1b**;  
578 **Supplementary Fig. 5d**, see Methods). Despite the higher expression of these genes in  
579 mesenchymal cells (LDK-resistant SH-SY5Y and SH-EP), none was associated with an SE,  
580 prompting us to focus on the promoter regions. We observed significantly higher enrichment of  
581 H3K27ac and H3K4me3 binding at regions spanning the transcription start sites (TSS  $\pm$  2 kb) at  
582 cell-intrinsic immune genes in LDK-resistant SH-SY5Y and SHEP compared to parental SH-SY5Y

Fig. 5

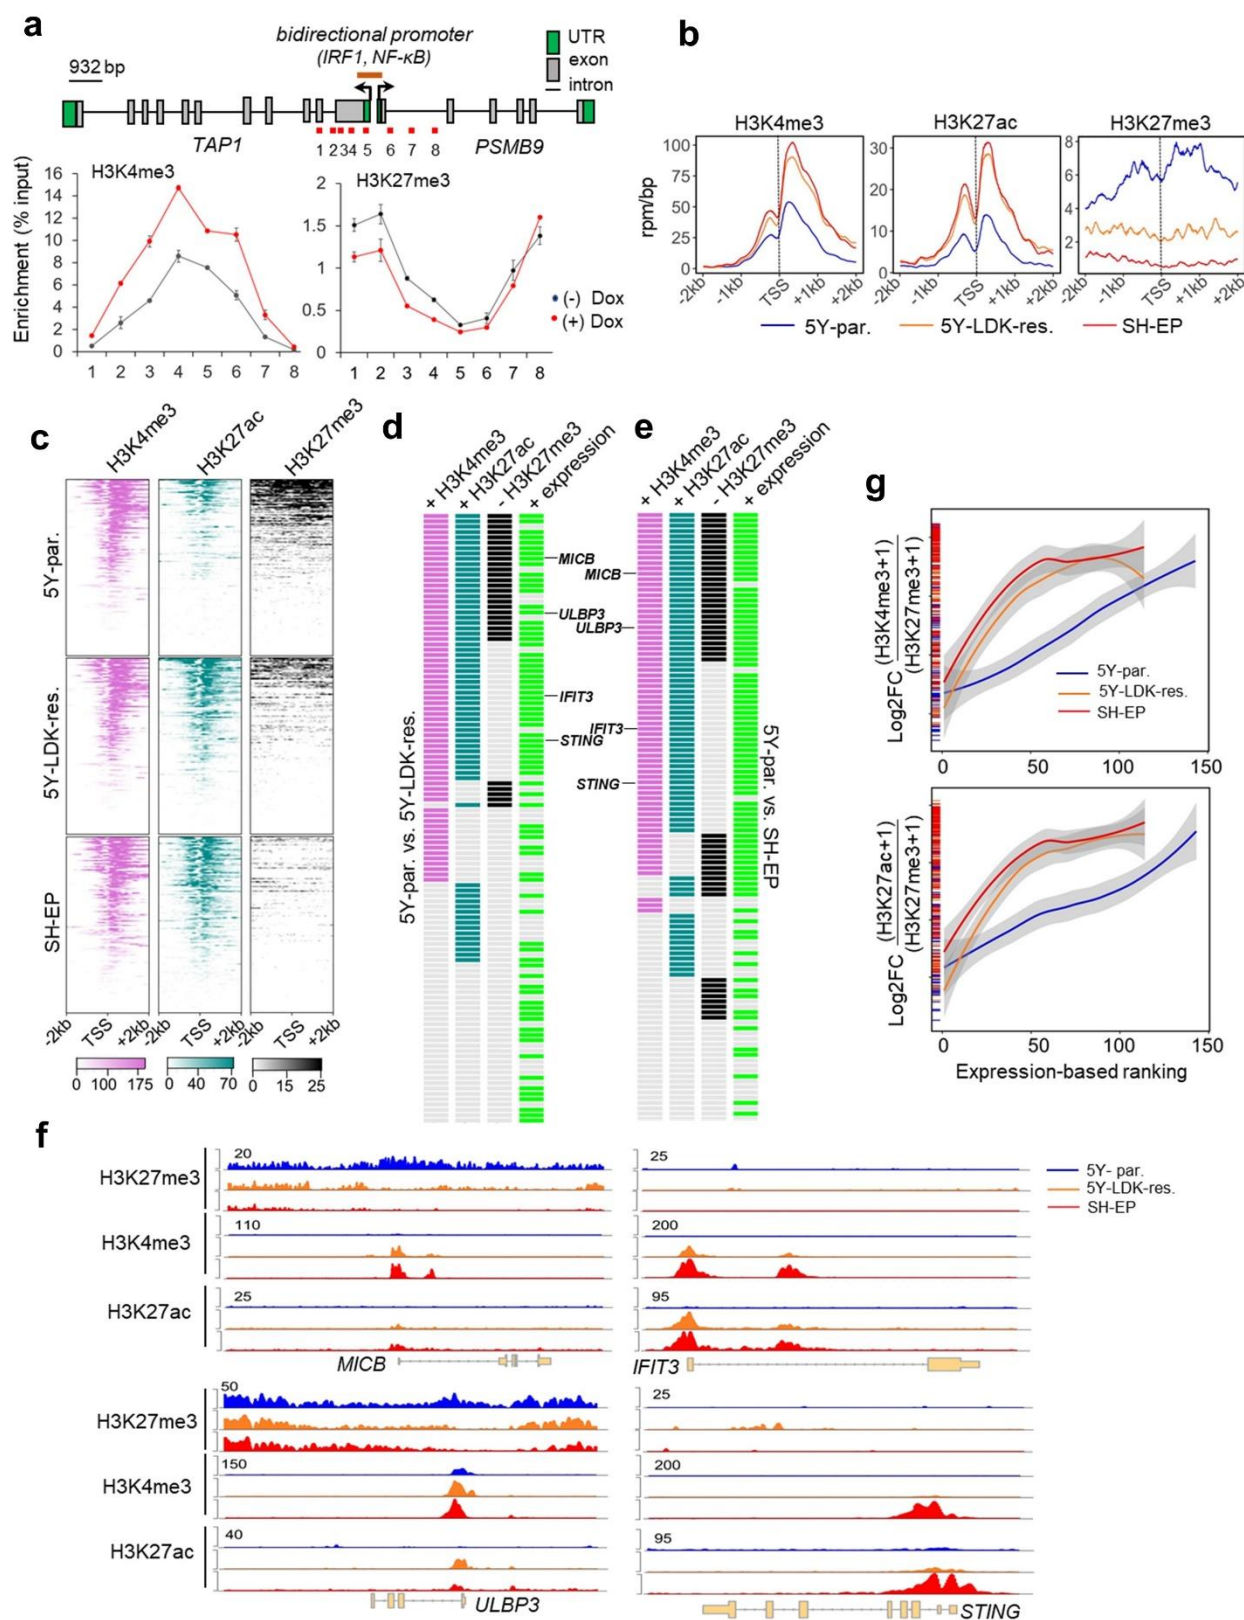

583 **Fig. 5. Activation of immune gene expression associated with cell state transition is**  
584 **epigenetically regulated. (a)** *Upper*, Linear representation of TAP1 and PSMB9 gene loci  
585 showing the locations of the bidirectional promoter and IRF1 and NF- $\kappa$ B binding sites. The  
586 amplicons (1-8) analyzed for histone mark occupancy are shown in red. *Lower*, ChIP-qPCR  
587 analysis of H3K4me3 and H3K27me3 enrichment at the indicated amplicons along the  
588 TAP1/PSMB9 locus in adrenergic SH-SY5Y cells expressing dox-inducible PRRX1 in the  
589 presence or absence of dox (200 ng/mL) for 10 days. Data represent the means  $\pm$  SD,  $n = 2$   
590 biological replicates. **(b)** Metagene representations of average ChIP-seq occupancies of the  
591 indicated histone marks at the promoters of tumor cell-intrinsic immune response genes (TSS  $\pm$   
592 2 kb;  $n = 134$ ) in parental (5Y-par.), LDK-resistant (5Y-LDK-res.) SH-SY5Y and SH-EP NB cells.  
593 **(c)** Heat map representation of histone enrichment at the same immune gene promoters as in  
594 **(b)**, ranked in decreasing order of occupancy in the indicated cells. Each row represents the  
595 normalized densities of histone marks within a  $\pm$  2 kb window centered on the TSS. **(d, e)**  
596 Representation of pairwise comparisons between parental SH-SY5Y and LDK-resistant SH-SY5Y  
597 **(d)**, and parental SH-SY5Y and SH-EP cells **(e)**. The changes (+, gained; -, lost) in occupancies  
598 of the active (H3K4me3, H3K27ac) and repressive (H3K27me3) histone marks ( $\log_2$  FC  $\geq$  0.75,  
599 TSS  $\pm$  2 kb), together with the corresponding changes in RNA expression (+, overexpressed;  $\log_2$   
600 FC  $\geq$  1) of each of the 134 tumor cell-intrinsic immune genes analyzed in **(b)** are shown.  
601 Representative genes showing either a switch from repressive to active chromatin (*MICB*, *ULBP3*)  
602 or associated only with a gain of active chromatin (*IFIT3*, *STING*) are shown. **(f)** ChIP-seq tracks  
603 depicting the gain of active histone binding together with the loss of repressive histone binding  
604 (*left*) or gain of active marks without changes in repressive mark occupancy (*right*) at the indicated  
605 immune gene loci. Signal intensity is given at the top left corner for each track. **(g)** Loess  
606 regression analysis of the correlation between the ratios of active to repressive histone binding at  
607 the promoters (TSS  $\pm$  2kb) of immune response genes and their RNA expression (*Upper*,

608 H3K4me3:H3K27me3; *Lower*, H3K27ac:H3K27me3). Genes are ranked based on increasing  
609 expression. Shaded regions represent 95% confidence intervals.

Supplementary Fig. 7.

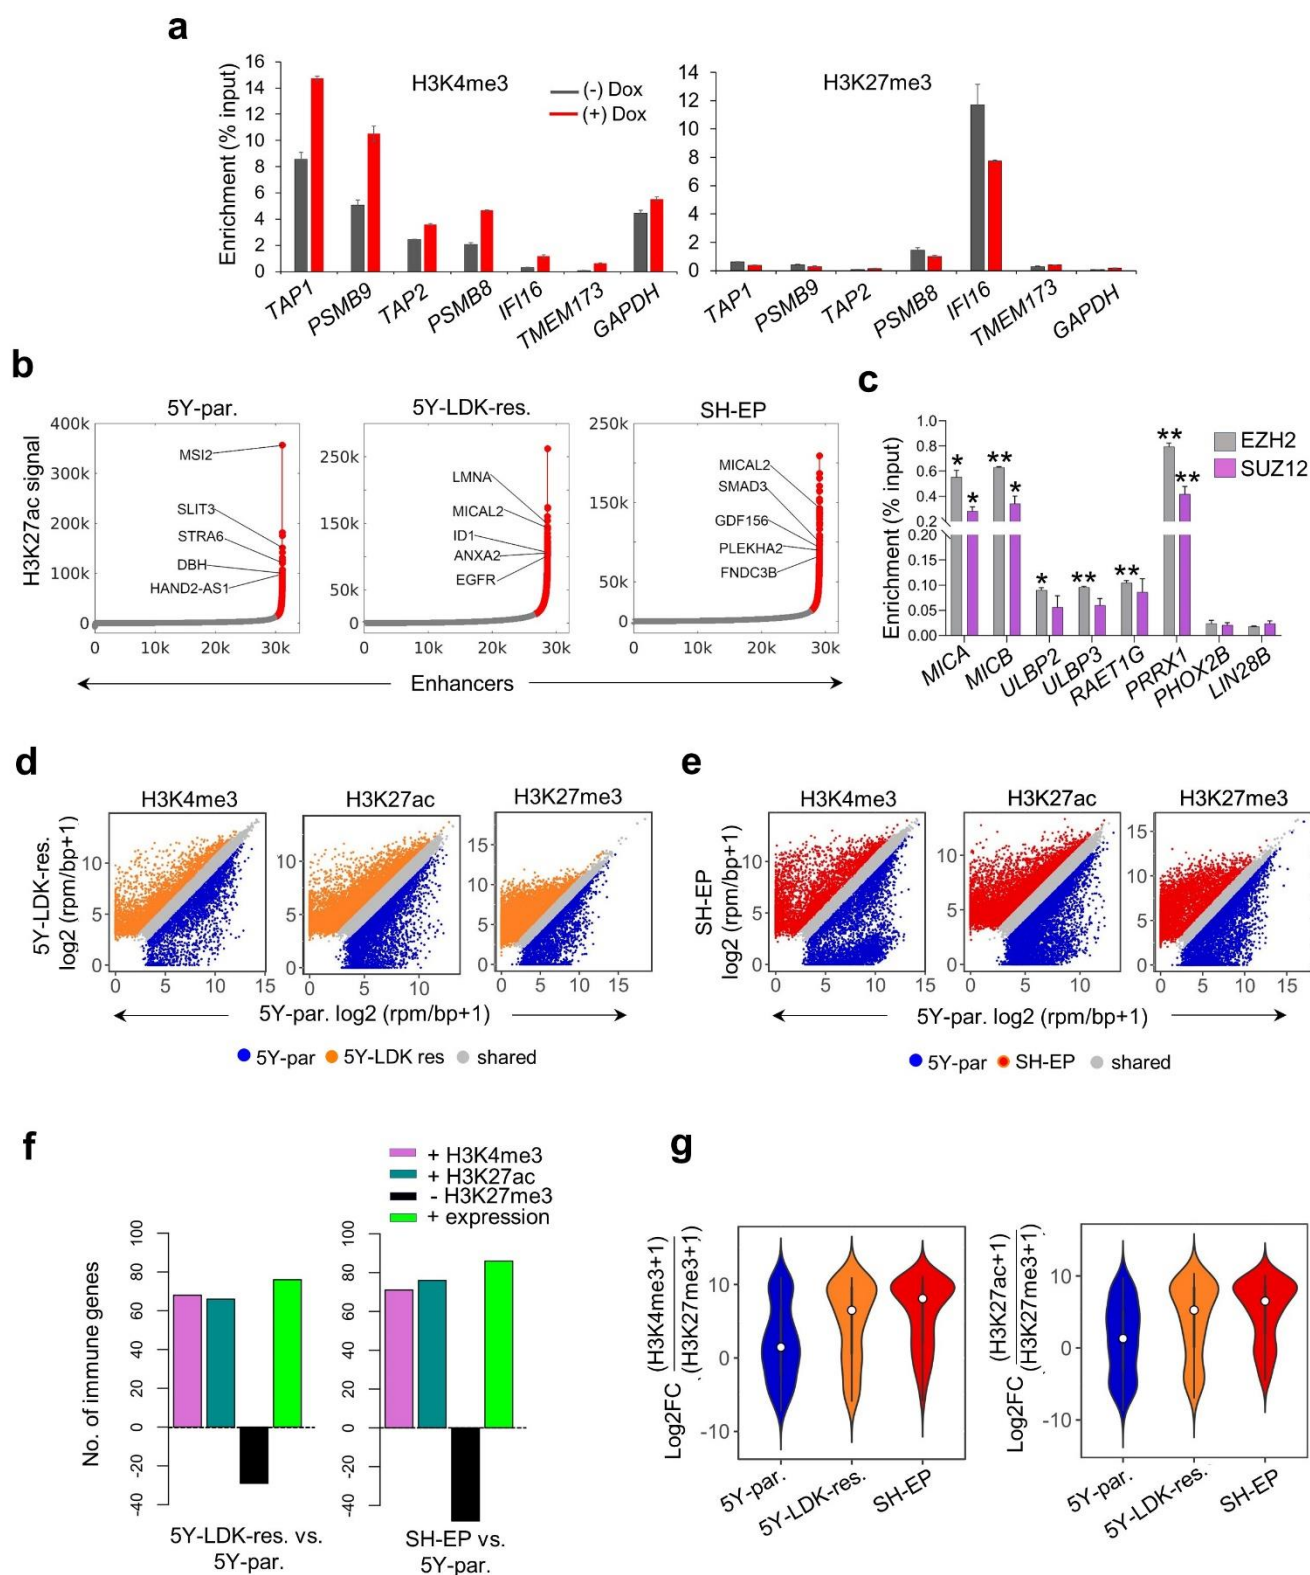



611 **Supplementary Fig. 7. Immune gene activation associated with the mesenchymal cell state**  
612 **is epigenetically regulated. (a)** ChIP-qPCR analysis of H3K4me3 and H3K27me3 enrichment  
613 at the promoters of the indicated immune genes in SH-SY5Y cells expressing doxycycline-  
614 inducible PRRX1 in the presence or absence of dox (200 ng/mL) for 10 days. Enrichments at  
615 TAP1 and PSMB9 loci correspond to amplicons 4 and 6 respectively, as described in **Fig. 5a**.  
616 Data represent the means  $\pm$  SD,  $n = 2$  biological replicates. **(b)** Identification of enhancer regions  
617 in parental SH-SY5Y, LDK-resistant SH-SY5Y and SH-EP cells. H3K27ac bound regions  
618 identified as significant peaks were stitched together if they were within 12.5 kb of each other and  
619 termed typical enhancers (plotted in grey). Super enhancers (SEs) were defined as stitched  
620 enhancers surpassing the threshold signal based on the inclination point in all cell types (plotted  
621 in red). In parental SH-SY5Y, LDK-resistant and SH-EP cells, 2.94% (915/31116), 6.56%  
622 (1880/28635) and 4.18% (1215/29057) of the enhancers were classified as SEs respectively. The  
623 top five SE-associated lineage-specific genes are highlighted. **(c)** ChIP-qPCR analysis of EZH2  
624 and SUZ12 enrichment at the indicated genes in adrenergic 5Y-par. cells. Data represent the  
625 means  $\pm$  SD,  $n = 2$  biological replicates, \* $P < 0.05$ ; \*\* $P < 0.01$  two-tailed Student's t-test.  $P$ -values  
626 were calculated in comparison to enrichment observed at the Lin28B TSS (negative control  
627 locus). **(d, e)** Scatter plots representing the differential binding of the indicated histone marks at  
628 the promoter regions (TSS  $\pm$  2 kb) of all protein coding genes between parental SH-SY5Y (5Y-  
629 par.) and LDK-resistant SH-SY5Y (5Y-LDK res.) **(d)**, and parental SH-SY5Y and SH-EP cells **(e)**.  
630 rpm/bp, reads per million mapped reads per base pair. A  $\geq 0.75 \log_2$ FC threshold was used to  
631 identify unique peaks for each individual histone mark. Unique and shared peaks are shown in  
632 different colors. **(f)** Bar plots representing the numbers of immune genes with increased  
633 deposition of H3K4me3 and H3K27ac ( $\log_2$  FC  $\geq 0.75$ , TSS  $\pm$  2 kb) and loss of H3K27me3 ( $\log_2$   
634 FC  $\geq 0.75$ , TSS  $\pm$  2 kb) histone marks, together with increased RNA expression ( $\log_2$  FC  $\geq 1$ ) in  
635 mesenchymal LDK-resistant SH-SY5Y (*left*) or SH-EP (*right*) as compared to adrenergic parental  
636 SH-SY5Y cells. **(g)** Violin plots of the ratios of active to repressive histone marks (*left*,

637 H3K4me3:H3K27me3; *right*, H3K27ac:H3K27me3) surrounding immune gene promoters (TSS ±  
638 2kb) in parental SH-SY5Y, LDK-resistant SH-SY5Y and SH-EP cells. Significance was  
639 determined by the two-sided Wilcoxon rank-sum test.

640 cells (**Fig. 5b, c**). On the other hand, the adrenergic parental SH-SY5Y cells showed significantly  
641 higher occupancies of the H3K27me3 repressor mark at these immune gene promoters (**Fig. 5b,**  
642 **c**). Analysis of the polycomb repressive complex 2 (PRC2) that promotes H3K27me3 deposition  
643 at repressed chromatin<sup>50</sup> revealed that immune response genes enriched for H3K27me3 binding,  
644 such as those encoding the NKG2D ligands *MICA/B*, *ULBP2/3* and *RAET1G* had significantly  
645 higher occupancies for PRC2 subunits, EZH2 and SUZ12 in adrenergic parental SH-SY5Y cells  
646 compared to negative control regions that lacked H3K27me3 binding (*PHOX2B* and *LIN28B*)  
647 (**Supplementary Fig. 7c**), suggesting active immune gene repression in these cells.

648  
649 We next sought to understand whether the activation of immune response genes observed  
650 during the cell state transition from sensitivity to resistance represented a *switch* from repressive  
651 to active chromatin or a *gain* of active chromatin marks. To this end, we quantified the changes  
652 in histone binding occupancies between adrenergic parental SH-SY5Y and mesenchymal LDK-  
653 resistant SH-SY5Y or SH-EP cells using pair-wise comparisons (**Supplementary Fig. 7d, e**).  
654 Compared to parental SH-SY5Y, LDK-resistant SH-SY5Y and SH-EP cells gained significant  
655 H3K4me3 binding at the promoters of 60% and 62% immune genes (68 and 71 of 114)  
656 respectively, which corresponded with their increased expression (**Fig. 5d, e; Supplementary**  
657 **Fig. 7f**). A similar significant enrichment of the H3K27ac histone mark was observed at the  
658 promoters of these immune genes [LDK-resistant SH-SY5Y, 58% (66/114); SH-EP, 67%  
659 (76/114)]. Interestingly, gain of these active marks was accompanied by a concomitant loss of  
660 H3K27me3 repressive histone binding at the promoters of 25% and 35% of (29 and 40 of 114)  
661 immune genes in LDK-resistant SH-SY5Y and SH-EP cells respectively, as represented by the  
662 NKG2D ligands, *MICB* and *ULBP3* (**Fig. 5d-f; Supplementary Fig. 7f**). On the other hand, in  
663 LDK-resistant SH-SY5Y and SH-EP mesenchymal cells, 48% and 41% (55 and 47 of 114)  
664 immune genes, such as the IFN-regulated factors *IFIT3* and *STING*, gained either one or both  
665 active marks without changes in occupancy of the repressive mark (**Fig. 5d-f; Supplementary**

666 **Fig. 7f).** Furthermore, the mesenchymal cells showed a significantly higher ratio of active to  
667 repressor histone binding at the TSSs of immune-related genes (H3K4me3 or  
668 H3K27ac/H3K27me3) (**Supplementary Fig. 7g**), which importantly, also correlated with the  
669 increased expression of these genes in this cell state (**Fig. 5g**). Therefore, our results suggest  
670 that the immune gene activation observed with the transition from the adrenergic to the  
671 mesenchymal cell state represents either a switch from repressive to active chromatin or a gain  
672 of active chromatin at promoter regions.

673

#### 674 **Mesenchymal neuroblastoma cells functionally engage cytotoxic T cells**

675 To assess the functional consequences of the increased immunogenicity associated with a  
676 mesenchymal phenotype, we utilized the murine neuroblastoma cell line NB-9464, which was  
677 derived from tumors arising in the Th-MYCN genetically engineered mouse model (GEMM). This  
678 model was generated in immunocompetent C57BL/6 mice and the tumors recapitulate the genetic  
679 and immunological features of human neuroblastoma<sup>51,52</sup>. We observed that NB-9464 cells  
680 consisted of distinct populations that could be sorted on the basis of surface MHC class I H-2Kb  
681 expression into high (H-2Kb<sup>hi</sup>)- or low (H-2Kb<sup>lo</sup>)-expressing populations (**Supplementary Fig. 8a**;  
682 **Fig. 6a**), both of which expressed transgenic human MYCN (**Fig. 6b**). Consistent with our  
683 hypothesis, H-2Kb<sup>hi</sup> cells were enriched for *bona fide* mesenchymal markers - Prrx1, Sox9,  
684 Notch1, and Snai2 (Slug) (**Fig. 6b**), and showed enhanced migration and invasion, as might be  
685 expected from their neural crest cell-like state (**Supplementary Fig. 8b, c**). Importantly, the  
686 mesenchymal H-2Kb<sup>hi</sup> NB-9464 cells, but not their adrenergic H-2Kb<sup>lo</sup> counterparts showed  
687 augmented expression of cell surface class I MHC H-2Kb in response to IFN- $\gamma$ , suggesting that  
688 the mesenchymal cells had the potential for inducing a T cell-driven antitumor immune response  
689 (**Fig. 6c**).

690 Hence, to determine whether the increased MHC class I expression of mesenchymal versus  
691 adrenergic cells translated into T cell activation, we first asked whether mesenchymal H-2Kb<sup>hi</sup>  
692 NB-9464 cells were capable of exogenous antigen presentation. Using the well-characterized  
693 chicken ovalbumin-derived peptide (OVA<sub>257-264</sub> or SIINFEKL) antigen that binds to H-2Kb and can  
694 be recognized by specific T cell receptors (TCRs) on CD8<sup>+</sup> T cells<sup>53</sup>, we found that in comparison  
695 to H-2Kb<sup>lo</sup> cells, H-2Kb<sup>hi</sup> cells expressed significantly higher levels of the H-2Kb-SIINFEKL  
696 complex (**Fig. 6d**). Next, we determined whether antigen presentation through H-2Kb enables  
697 mesenchymal tumor cells to be recognized by antigen-specific T cell receptors (TCRs) on CD8<sup>+</sup>  
698 T cells, the first step towards a cytotoxic response. For this purpose, we used OT-I CD8<sup>+</sup> T cells  
699 from C57BL/6 mice expressing a transgenic TCR that specifically recognizes the H-2Kb-  
700 SIINFEKL complex<sup>53</sup>. H-2Kb<sup>hi</sup> or H-2Kb<sup>lo</sup> cells loaded with the SIINFEKL peptide were cocultured  
701 with naïve OT-I cells, after which OT-I activation was measured through cell surface CD69  
702 expression, an early marker of T-cell activation<sup>54</sup>. Mesenchymal H-2Kb<sup>hi</sup> cells led to significantly  
703 higher OT-I activation in comparison with adrenergic H-2Kb<sup>lo</sup> cells, indicating specific recognition  
704 of the H-2Kb-SIINFEKL complex by the TCR on OT-I cells (**Fig. 6e**). By contrast, co-cultures of  
705 OT-I cells and either H-2Kb<sup>lo</sup> or H-2Kb<sup>hi</sup> NB-9464 neuroblastoma cells without the SIINFEKL  
706 peptide did not lead to T-cell recognition, confirming the specificity of the TCR-antigen interaction  
707 (**Fig. 6e**). Finally, we investigated whether the differential MHC-I expression between adrenergic  
708 and mesenchymal neuroblastoma cells influenced tumor growth *in vivo* through subcutaneous  
709 injection of H-2Kb<sup>hi</sup> or H-2Kb<sup>lo</sup> cells into syngeneic C57BL/6 (H-2Kb haplotype) mice  
710 (**Supplementary Fig. 8d**). We noted an earlier onset of tumor formation with H-2Kb<sup>lo</sup> cells  
711 compared to H-2Kb<sup>hi</sup> cells (**Supplementary Fig. 8d**). However, once consistent tumor growth  
712 was established, growth or survival rates did not change substantially between the two groups  
713 (**Supplementary Fig. 8e**), despite the persistence of higher H-2Kb and Prrx1 expression in the  
714 H-2Kb<sup>hi</sup> tumors compared with the H-2Kb<sup>lo</sup> tumors (**Supplementary Fig. 8f,g**). While both types  
715 of tumor cells had MYCN expression, histologically, in keeping with their adrenergic phenotype

**Fig. 6.**

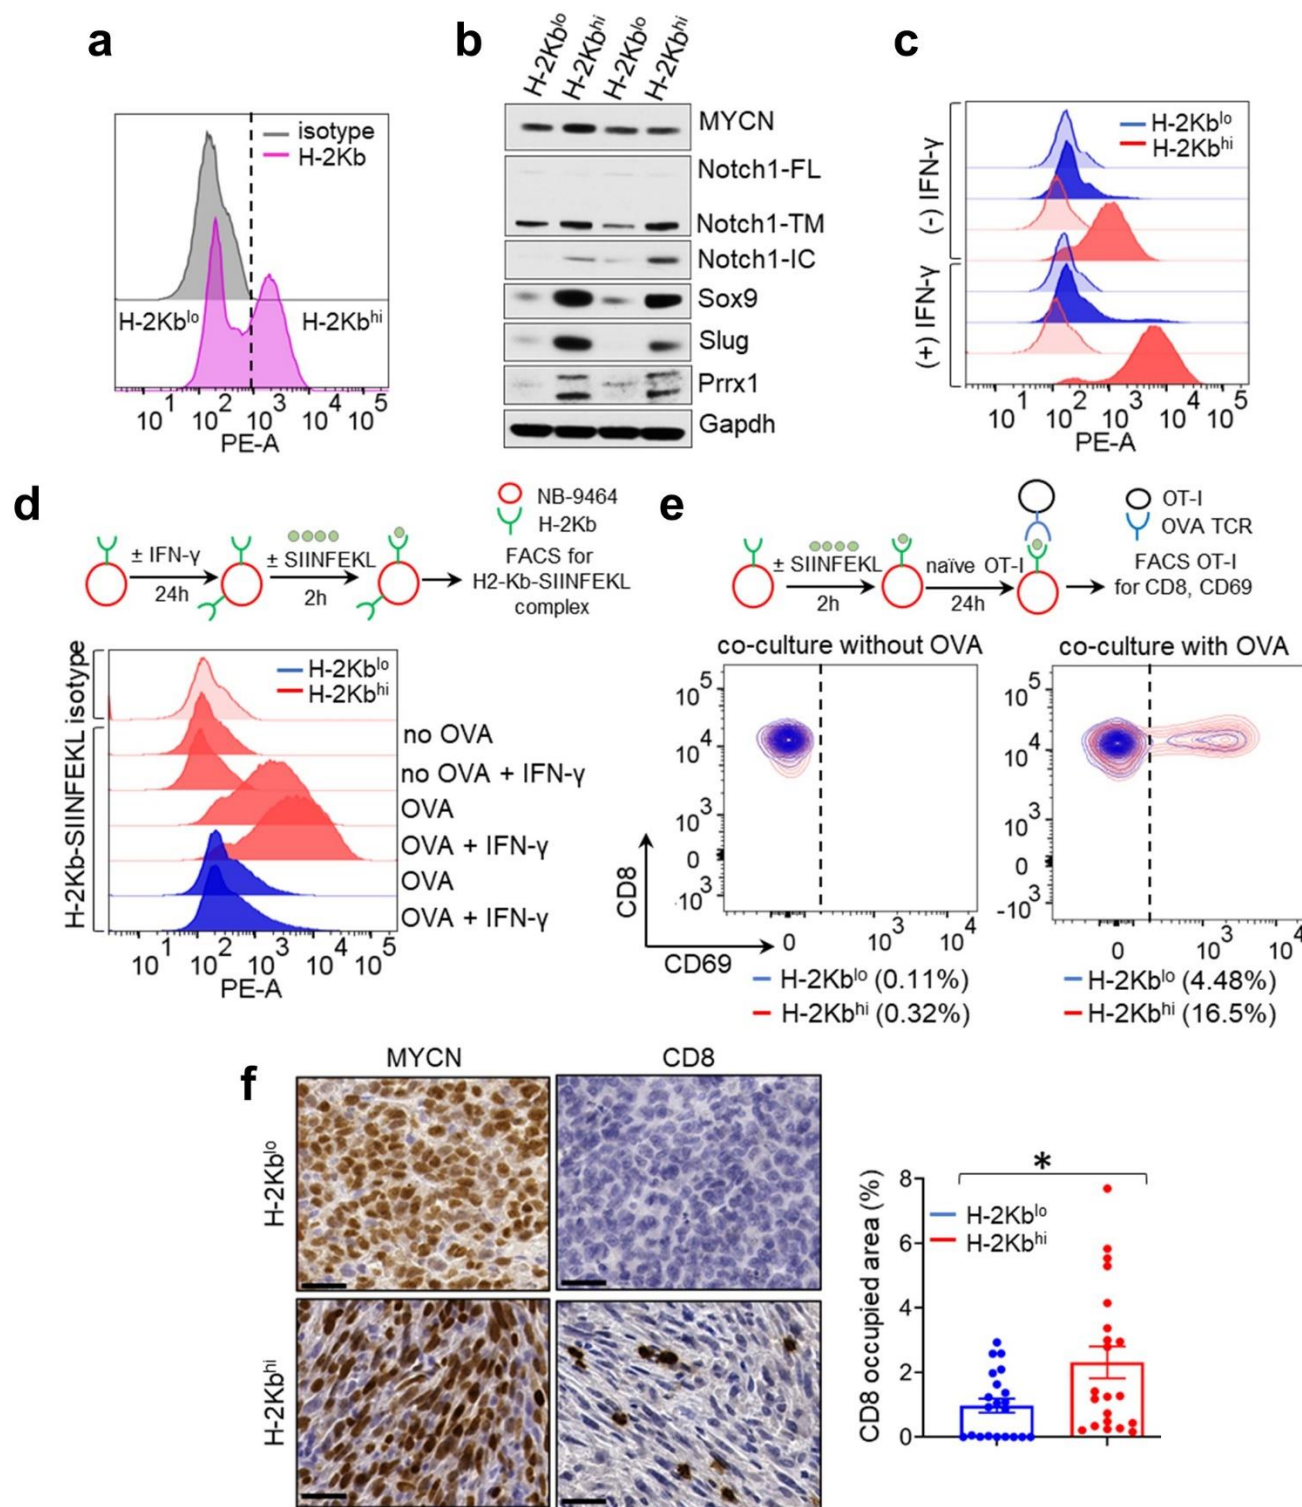



716 **Fig. 6. Mesenchymal NB cells functionally engage cytotoxic T cells.** (a) FACS analysis of  
717 H-2Kb expression in unsorted NB-9464 cells. Vertical dashed line denotes the logscale  
718 expression value used as a threshold to gate H-2Kb<sup>lo</sup> and H-2Kb<sup>hi</sup> cell populations. (b) WB  
719 analysis of the indicated lineage markers in H-2Kb<sup>lo</sup> and H-2Kb<sup>hi</sup> cell populations. Notch1-FL, full  
720 length; -TM, transmembrane; -IC, intracellular. GAPDH is used as a loading control. (c) FACS  
721 analyses of basal and IFN- $\gamma$ -induced (100 ng/mL for 24 hr.) surface H-2Kb expression (darker  
722 colored histograms) in H-2Kb<sup>lo</sup> and H-2Kb<sup>hi</sup> cells compared to isotype controls (lighter colored  
723 histograms). Plots representative of 2 independent experiments. (d) *Upper*, Schematic of OVA  
724 binding assay. *Lower*, FACS analysis of surface H-2Kb-bound SIINFEKL OVA peptide in H-2Kb<sup>hi</sup>  
725 and H-2Kb<sup>lo</sup> cells under basal or IFN- $\gamma$ -induced conditions as in (c) and in the absence or  
726 presence of the OVA peptide. Plots representative of 2 independent experiments. (e) *Upper*,  
727 Schematic of NB-9464-OT-I co-culture assay. *Lower*, Contour plots showing the percentage of  
728 naïve OT-I cells that were activated (CD8<sup>+</sup> CD69<sup>+</sup>) following co-culture with H-2Kb<sup>lo</sup> and H-2Kb<sup>hi</sup>  
729 cells for 24 hr. with or without the OVA peptide. OT-I activation was measured by FACS analysis  
730 of cell surface CD69. (f) *Left*, Immunohistochemical (IHC) staining for MYCN and CD8 expression  
731 in representative murine NB xenograft tumors derived from NB-9464 H-2Kb<sup>lo</sup> (adrenergic) and H-  
732 2Kb<sup>hi</sup> (mesenchymal) cells in immunocompetent syngeneic (C57BL/6) mice. Scale bars, 100  $\mu$ m.  
733 *Right*, Bar graphs showing the percentage of area occupied by CD8<sup>+</sup> T cells in H-2Kb<sup>lo</sup> (0.9%  $\pm$   
734 0.2%) vs. H-2Kb<sup>hi</sup> (2.3%  $\pm$  0.5%) tumors; \* $P$  < 0.05, two-tailed Welch's t-test. Each dot represents  
735 one of three independent measurements for each tumor. Data represent mean  $\pm$  SEM.

Supplementary Fig. 8.

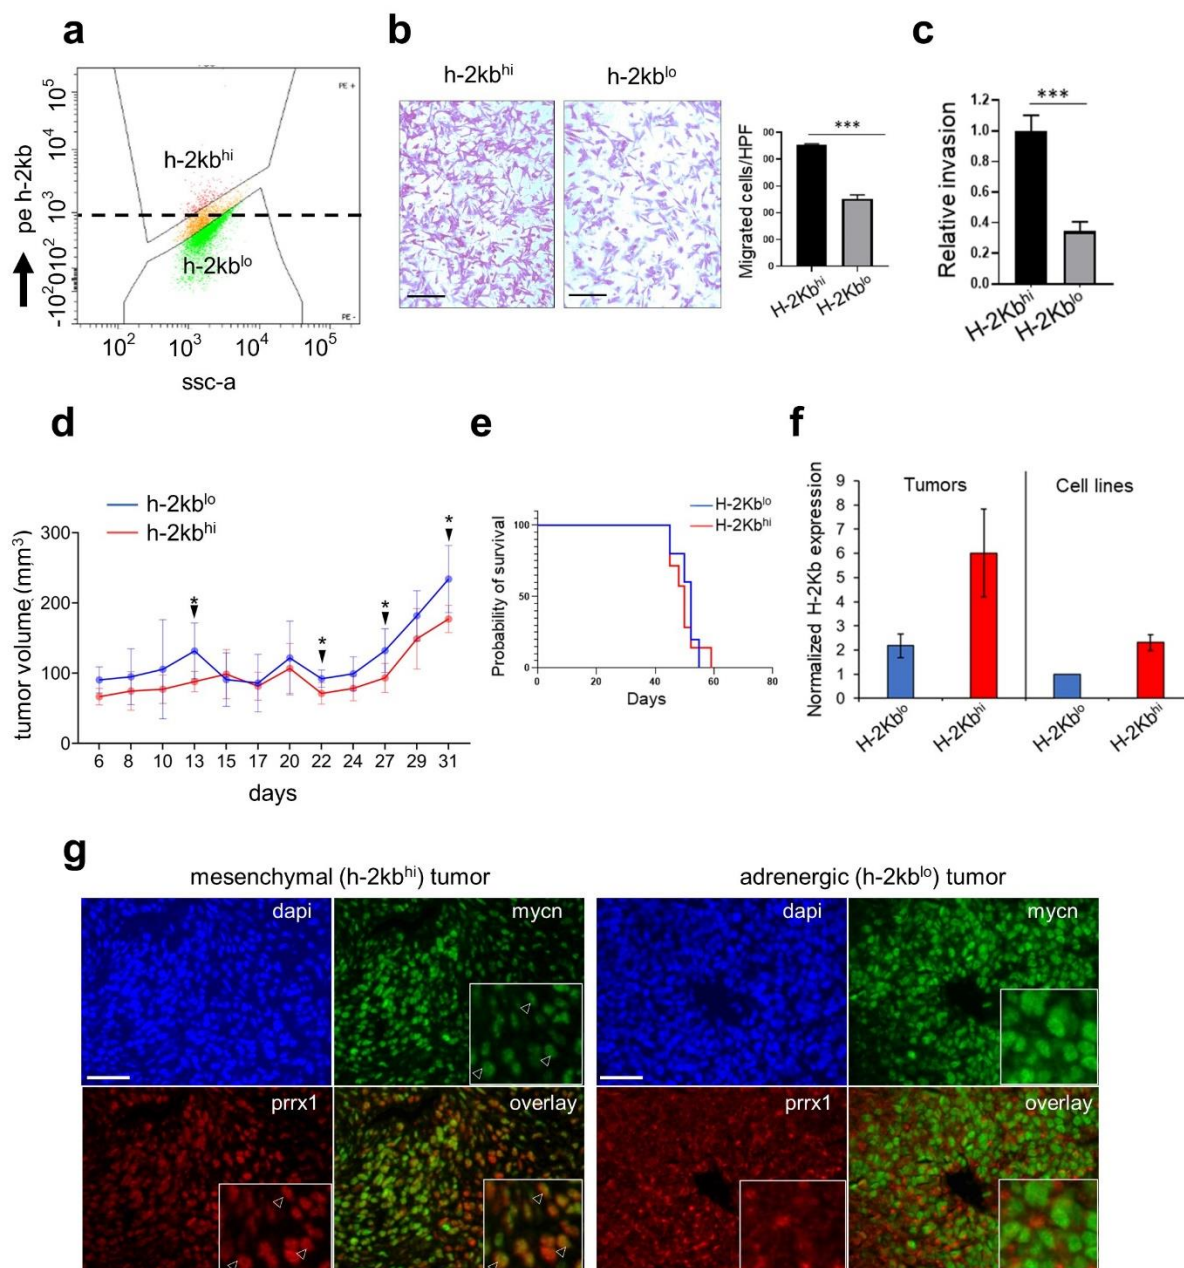

736 **Supplementary Fig. 8. Tumors that arise from NB-9464 H-2Kb<sup>hi</sup> (mesenchymal) cells show**  
737 **cytotoxic T cell infiltration. (a)** FACS scatter plot showing gating conditions used for sorting  
738 NB-9464 cells into H-2Kb<sup>hi</sup> and H-2Kb<sup>lo</sup> populations. X axis represents side scatter (SSC-A); Y  
739 axis denotes fluorescence intensity of surface H-2Kb detected using phycoerythrin (PE)-  
740 conjugated antibody against H-2Kb. A logscale expression value of  $10^3$  was used as the threshold  
741 (horizontal dashed line) to gate H-2Kb<sup>hi</sup> ( $\geq 10^3$ ) and H-2Kb<sup>lo</sup> ( $< 10^3$ ) populations. **(b)** *Left*, Bright  
742 field images of crystal violet-stained H-2Kb<sup>hi</sup> and H-2Kb<sup>lo</sup> cells in transwell migration assays. Scale  
743 bars, 100  $\mu$ m. *Right*, Quantification of migrating cells per high-power field (HPF). Data represent  
744 the means  $\pm$  SD,  $n = 2$  biological replicates,  $***P < 0.001$ ; two-tailed Student's t-test. **(c)**  
745 Quantification of the relative invasiveness of H-2Kb<sup>hi</sup> and H-2Kb<sup>lo</sup> cells. Data represent the means  
746  $\pm$  SD,  $n = 2$  biological replicates,  $***P < 0.001$ ; two-tailed Student's t-test. **(d)** Tumor volumes in  
747 immunocompetent C57BL/6 mice injected subcutaneously with  $1 \times 10^6$  H-2Kb<sup>lo</sup> or H-2Kb<sup>hi</sup> NB-  
748 9464 cells. Measurements were started on day 3 after injection and continued three times weekly  
749 for up to 50 days or until euthanized due to tumor growth. Graphs represent changes in tumor  
750 volume until day 31 (means  $\pm$  SD;  $n = 7$  per group at all time points) to highlight an earlier onset  
751 of tumor formation with H-2Kb<sup>lo</sup> cells compared to H-2Kb<sup>hi</sup> cells. Tumors were considered to be  
752 established upon reaching a volume of  $\sim 250$  mm<sup>3</sup> (observed between days 31-34 for both H-2Kb<sup>lo</sup>  
753 and H-2Kb<sup>hi</sup> tumors), following which both tumor types displayed equal increases in tumor growth  
754 (data not shown). Tumor onset was defined as the day following which tumor volumes showed a  
755 consistent increase ( $24.3 \pm 2.2$  days for H-2Kb<sup>lo</sup> and  $27.4 \pm 2.1$  days for H-2Kb<sup>hi</sup> cells,  $P < 0.05$ ).  
756 Closed arrows refer to the indicated days (13, 22, 27 and 31) on which there were significant  
757 differences in tumor volumes (day 13,  $P = 0.02$ ; day 22,  $P = 0.01$ ; day 27,  $P = 0.02$  and day 31,  
758  $P = 0.02$ ;  $n = 7$  per group at all time points). All  $P$ -values calculated using the two-tailed Student's  
759 t-test. **(e)** Kaplan-Meier survival analysis of immunocompetent C57BL/6 mice bearing NB tumor  
760 xenografts derived from H-2Kb<sup>lo</sup> (adrenergic) and H-2Kb<sup>hi</sup> (mesenchymal) cells ( $50.8 \pm 3.7$  vs.  
761  $49.8 \pm 4.8$  days;  $P = 0.7$ ;  $n = 7$  per group; log-rank test. **(f)** RT-qPCR analysis of H-2Kb expression

762 in H-2Kb<sup>lo</sup> and H-2Kb<sup>hi</sup> NB tumor xenografts and the cell lines used to generate the xenografts.  
763 Data represent the means  $\pm$  SD,  $n = 3$  biological replicates. **(g)** Immunofluorescence images of  
764 MYCN (green) and Prrx1 (red) expression in representative murine NB xenograft tumors derived  
765 from NB-9464 H-2Kb<sup>hi</sup> (mesenchymal) and H-2Kb<sup>lo</sup> (adrenergic) cells in immunocompetent  
766 syngeneic (C57BL/6) mice. Nuclei are counterstained with DAPI (blue). Insets depict cells with  
767 nuclear co-staining of MYCN and Prrx1 (arrowheads) and are exclusively present in the H-2Kb<sup>hi</sup>  
768 mesenchymal tumor. Scale bars, 100  $\mu$ m, insets 33.3  $\mu$ m.

769 H-2Kb<sup>lo</sup> tumors were composed of densely arranged small round blue cells, whereas H-2Kb<sup>hi</sup>  
770 tumors predominantly comprised elongated, spindle-like cells interspersed with clusters of small  
771 round blue cells (**Fig. 6f**). We next analyzed the immune status of these tumors, reasoning that  
772 tumors arising from immunogenic H-2Kb<sup>hi</sup> cells would be infiltrated by T cells. Indeed, H-2Kb<sup>hi</sup>  
773 tumors showed significantly higher CD8<sup>+</sup> T cell infiltration compared with H-2Kb<sup>lo</sup> tumors (**Fig. 6f**).  
774 Taken together, these results suggest that the immunogenic traits of mesenchymal  
775 neuroblastoma cells translate into the recruitment of cytotoxic T cells into the tumor  
776 microenvironment.

777

#### 778 **Mesenchymal neuroblastoma cells induce NK cell degranulation**

779 We next analyzed the functional relevance of the increased expression of the NKG2D NK cell  
780 receptor ligands (ULBP1-3, MICA, MICB) seen in mesenchymal neuroblastoma tumors  
781 (**Supplementary Fig. 4c; Fig. 4i**). Since the interaction of the receptor with its cognate ligands  
782 on target cells is the first step towards a cytotoxic response (**Fig. 7a**), we compared the ability of  
783 adrenergic (parental SH-SY5Y) and mesenchymal (LDK-resistant SH-SY5Y and SH-EP) cells to  
784 bind to the recombinant NKG2D receptor fusion protein in an *in vitro* binding assay. Both  
785 mesenchymal cell types showed increased binding to the NKG2D receptor, in keeping with their  
786 increased cell surface expression of the ULBP2/3/5/6, MICA and MICB ligands (**Fig. 7b**). NK cell  
787 cytotoxicity is mediated by granzyme proteases and the pore-forming protein perforin, which in  
788 resting cells are stored in secretory lysosomes or lytic granules marked by lysosome-associated  
789 membrane protein-1 (LAMP-1 or CD107a)<sup>55</sup>. Upon target recognition, NK cells undergo  
790 degranulation, or exocytosis of the lytic granules, which is associated with relocation of the  
791 CD107a antigen to the cell membrane. Using cell-surface CD107a as a specific marker of  
792 degranulation, we measured degranulation of peripheral blood NK cells harvested from healthy  
793 human donors in the presence of parental SH-SY5Y, LDK-resistant SH-SY5Y and SH-EP targets.

**Fig. 7.**

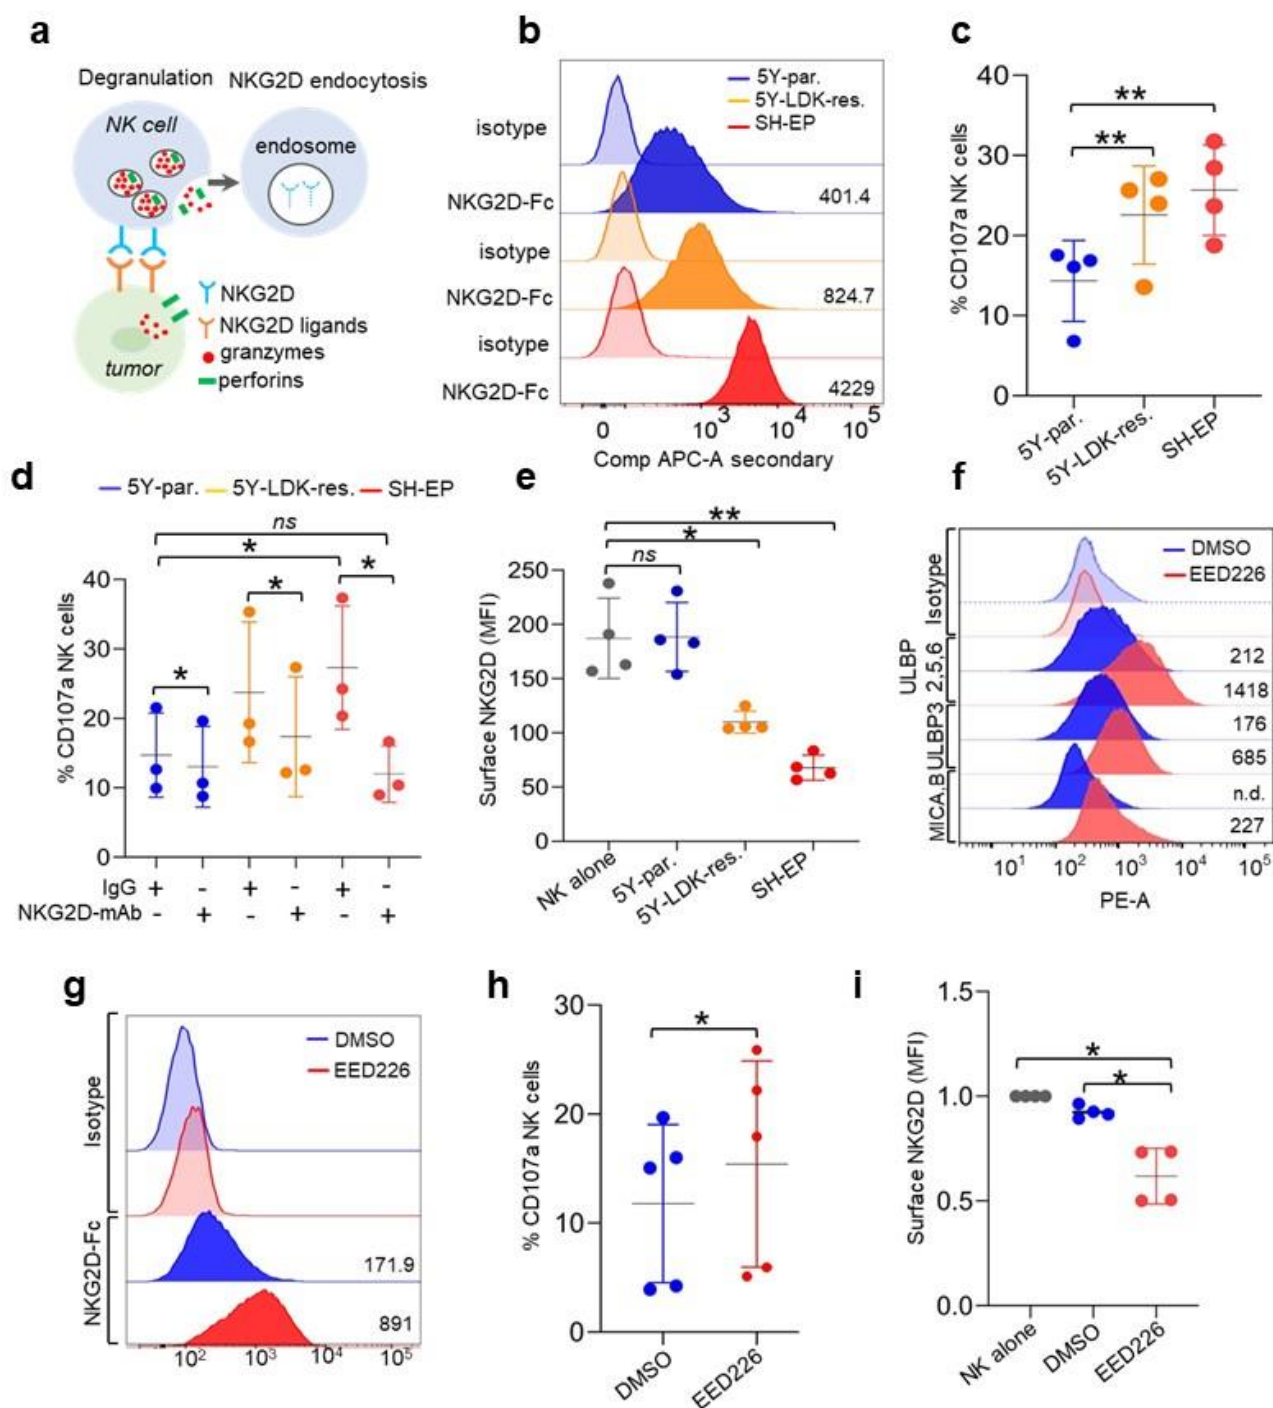



794 **Fig. 7. Mesenchymal NB cells induce NK cell degranulation. (a)** Schematic representation of  
795 the interaction between NKG2D receptors on NK cells and cognate ligands on tumor cells, leading  
796 to NK cell degranulation and receptor endocytosis. **(b)** FACS analysis of purified human NKG2D-  
797 Fc protein binding (darker histograms) to adrenergic parental SH-SY5Y, and mesenchymal LDK-  
798 resistant SH-SY5Y and SH-EP cells. Comp Alexa-647, compensated fluorescence intensity of  
799 NKG2D-Fc protein detected using Alexa 647-conjugated anti-human IgG. Lighter histograms  
800 indicate staining with Alexa 647-conjugated anti-human IgG only. Numbers indicate median  
801 fluorescence intensity (MFI). Plots representative of 2 independent experiments. **(c)** X-Y plot  
802 showing the percentage of degranulating NK cells following co-culture with the same cells as in  
803 **(b)** for 4 hr. at an effector: target (E: T) cell ratio of 1:2. Degranulation was measured by FACS  
804 analysis of cell-surface CD107a. Data represent the means  $\pm$  SD,  $n = 4$  biological replicates. **(d)**  
805 X-Y plot showing the effect of a control IgG1 or an NKG2D blocking antibody on NK cell  
806 degranulation following co-culture with the indicated cells for 4 hr. NK cell degranulation was  
807 measured as in **(c)**. Data represent the means  $\pm$  SD,  $n = 4$  biological replicates. **(e)** X-Y plot  
808 depicting the MFI of NKG2D expression measured by FACS on naïve NK cells (NK alone) or  
809 following co-culture with parental SH-SY5Y, LDK-resistant SH-SY5Y and SH-EP cells for 4 h.  
810 Data represent the means  $\pm$  SD,  $n = 4$  biological replicates. **(f)** FACS analysis of surface  
811 ULBP2/5/6, ULBP3, and MICA/MICB in adrenergic parental SH-SY5Y cells treated with DMSO  
812 (vehicle control) or EED226 (5  $\mu$ M for 8 days). **(g)** FACS analysis of purified human NKG2D-Fc  
813 protein binding to parental SH-SY5Y cells treated with either DMSO or EED226 as in **(f)**. Light  
814 gray histograms indicate human IgG1 isotype control. Numbers on the right represent MFI values  
815 for FACS plots. Plots in **(f)** and **(g)** are representative of 2 independent experiments. **(h, i)** X-Y  
816 plots showing NK cell degranulation **(h)** and MFI of surface-NKG2D **(i)** following co-culture of  
817 naïve NK cells with parental SH-SY5Y cells treated with DMSO or EED226 as in **(f)**. NK cell  
818 granulation and NKG2D MFI were measured as in **(c)** and **(e)**. Data represent means  $\pm$  SD,  $n =$

819 4 **(h)** and 5 **(i)** biological replicates. Significance for all results was calculated using the paired  
820 two-tailed Student's t-test (\* $P < 0.05$ ; \*\* $P < 0.01$ ); *ns*, not significant

**Supplementary Fig. 9.**

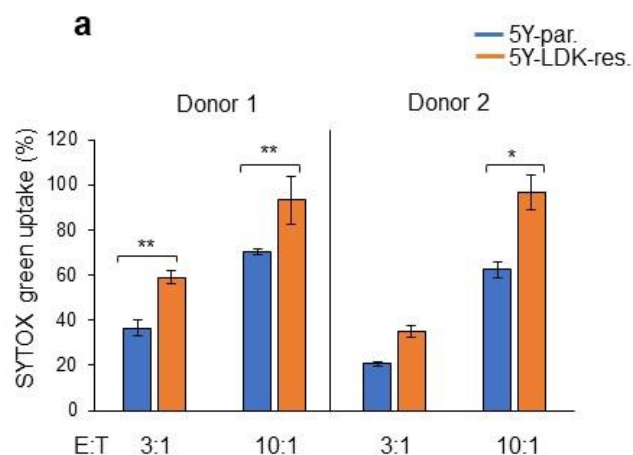

**Supplementary Fig. 9. LDK-resistant SH-SY5Y cells are more susceptible to NK-induced cell death.**

**(a)** Bargraphs showing NK-induced cell death in parental SH-SY5Y and LDK-resistant SH-SY5Y cells assessed by SYTOX green uptake following 1 hour of co-culture at indicated effector-to-target (E:T) ratios. Experiments were performed in two biological replicates using NK cells harvested from two independent donors. Data represent means  $\pm$  SD,  $n = 3$  technical replicates. Significance for all results was calculated using the paired two-tailed Student's t-test (\* $P < 0.05$ ; \*\* $P < 0.01$ ).

821 Co-culture of NK cells with LDK-resistant SH-SY5Y and SH-EP cells, both of which express  
822 ligands for the NKG2D receptor, resulted in increased NK cell degranulation compared to parental  
823 SH-SY5Y cells that did not express these ligands (**Fig. 7c**). To confirm that the increased NK cell  
824 degranulation in LDK-resistant SH-SY5Y and SH-EP cells was specific to the NKG2D receptor,  
825 we blocked its function with an anti-NKG2D monoclonal antibody. Compared to the isotype  
826 control, blockade of NKG2D receptor activity completely abrogated the increased NK cell  
827 degranulation in LDK-resistant SH-SY5Y and SH-EP cells, but had no effects on parental SH-  
828 SY5Y cells, signifying that the modest but robust increase in degranulation in the presence of  
829 mesenchymal cells was specific to the NKG2D receptor on NK cells (**Fig. 7d**). Upon interaction  
830 with their cognate ligands on target cells, NKG2D receptors are internalized via ubiquitin-  
831 dependent endocytosis leading to their lysosomal degradation, rendering the loss of surface  
832 NKG2D receptor expression a robust readout for ligand-receptor engagement<sup>56</sup> (**Fig. 7a**). In line  
833 with the presence of functional NKG2D ligands on mesenchymal cells, co-cultures with LDK-  
834 resistant SH-SY5Y and SH-EP cells led to significant downregulation of NK cell surface-  
835 associated NKG2D expression, whereas co-culture with the adrenergic parental SH-SY5Y cells  
836 did not alter the abundance of surface NKG2D expression (**Fig. 7e**). Moreover, consistent with  
837 the increased levels of NK degranulation upon co-culture with mesenchymal cells, LDK-resistant  
838 SH-SY5Y were more susceptible to NK-induced cell death compared to parental SH-SY5Y cells  
839 (**Supplementary Fig. 9a**)

840  
841 The observation that genes encoding NKG2D ligands are repressed by the PRC2 complex in  
842 adrenergic parental SH-SY5Y cells (**Supplementary Fig. 7c**) prompted us to examine whether  
843 PRC2 inhibitors could induce the expression of these transcripts and influence NK cell function.  
844 Indeed, treatment of parental SH-SY5Y cells with EED226, an allosteric inhibitor of the PRC2  
845 complex<sup>57</sup>, led to increased expression and surface localization of ULBP2/3 and MICA/B NKG2D  
846 ligands (**Fig. 7f**). Moreover, such increased ligand expression led to their increased binding to the

847 NKG2D receptor fusion protein in EED226-treated cells compared to cells treated with DMSO  
848 alone (**Fig. 7g**). Consequently, PRC2 inhibition resulted in an ~20% increase in NK cell  
849 degranulation (**Fig. 7h**). Finally, co-culture of primary NK cells with adrenergic parental SH-SY5Y  
850 cells treated with EED226 led to a significant loss of surface NKG2D receptor expression (**Fig.**  
851 **7i**), suggesting that the increased degranulation resulting from PRC2 inhibition was driven by the  
852 NKG2D receptor. Overall, these results suggest that the lineage-specific expression of NK cell  
853 ligands in mesenchymal neuroblastoma cells has a functional impact on NK cell activity, and that  
854 pretreatment of adrenergic neuroblastoma cells could potentially render these cells susceptible  
855 to NK-cell mediated immunotherapy by upregulating ligand expression.

856 **DISCUSSION**

857 Despite the relatively poor track record of immunotherapy for neuroblastoma, growing evidence  
858 suggests that subsets of these tumors have the potential to induce a productive immune  
859 response<sup>9</sup>. Here, we demonstrate that the mesenchymal cell state, characterized by neural crest  
860 cell (NCC)-like phenotypes, is a strong predictor of an antitumor immune response in  
861 neuroblastoma. Induction of this state was accompanied by the expression of tumor cell-intrinsic  
862 immune response-inducing genes that were epigenetically repressed in the more differentiated  
863 (adrenergic) tumor cells. Importantly, inhibition of the PRC2 complex relieved such repression of  
864 ligands for the activating NK cell receptor NKG2D, and led to NK cell degranulation, suggesting  
865 that this strategy could be explored as a potential measure to improve the response of patients  
866 with adrenergic neuroblastomas to NK cell-mediated therapy.

867

868 We sought to identify neuroblastomas capable of eliciting an immune response as those  
869 characterized by the differential expression of immune gene signatures while remaining agnostic  
870 to any of the established parameters that predict disease aggressiveness. Using UMAP  
871 dimension reduction to analyze gene expression data from 498 primary neuroblastoma tumors,  
872 we identified four clusters that were separated on the basis of differential activation of gene  
873 networks that regulate the antitumor immune response, neuronal differentiation, MYCN-driven  
874 processes and lipid metabolism. Intriguingly, the immunogenic cluster comprised almost equal  
875 proportions of high- and low-risk tumors, raising the possibility that the molecular mechanisms  
876 underlying immunogenicity in neuroblastoma are independent of disease aggressiveness. Thus,  
877 our analysis using a cluster-based approach enabled the identification of antitumor immune  
878 signatures as shared transcriptional programs between high- and low-risk neuroblastoma tumors,  
879 a bridging feature that would have been missed in studies based solely on differential gene  
880 expression between prognostically distinct groups of tumors.

881



882 A major finding of our study is the intimate link between tumor cell lineage and the propensity  
883 of eliciting an immune response. Neuroblastoma tumors show lineage plasticity, underscored by  
884 a phenotypic switch between undifferentiated NCC-like and more differentiated cells, two  
885 divergent cell states driven by distinct transcriptional programs<sup>37,38</sup>. Our analysis revealed that  
886 neuroblastomas enriched in NCC-derived signatures showed significantly higher antitumor  
887 immunity featuring T and NK cells compared to tumors enriched for signatures of the adrenergic  
888 lineage. Our finding is substantiated by studies showing that diverse cellular states such as  
889 stemness, senescence and metastasis strongly influence the engagement of innate and adaptive  
890 immune pathways<sup>58-60</sup>. Importantly, while the NCC-like/mesenchymal state promoted immune  
891 response mechanisms such as upregulation of MHC class I and infiltration of cytotoxic  
892 lymphocytes, these tumors were also characterized by the activation of immune checkpoints such  
893 as regulatory T cells and exhaustion markers linked to immune suppression, similar to those  
894 observed in chronic virally infected states<sup>61</sup>. The presence of such seemingly contradictory gene  
895 signatures has important therapeutic implications for selecting patients who are likely to benefit  
896 from T cell-based immunotherapies, as agents that target negative regulatory immune  
897 checkpoints are likely to be most effective in those with a pre-existing but dampened antitumor  
898 immune response<sup>35</sup>. Moreover, inhibition of cancer cell-intrinsic transcriptional programs that  
899 promote T cell exclusion have been shown to effect changes in cell state and could potentially  
900 employed to sensitize tumors to immunotherapy (Jerby-Arnon et al., 2018; Koyama et al., 2016;  
901 Spranger et al., 2015).

902  
903 In contrast to other *MYC*-driven cancers where high *MYC* levels restrain inflammatory  
904 signaling and anti-tumor immune pathways<sup>41,62</sup>, tumors within our immunogenic cluster, enriched  
905 largely for mesenchymal/NCC signatures, had relatively high *MYC* expression that positively  
906 correlated with immune cell infiltration. These diametrically opposite roles of *MYC* in regulating  
907 immune response suggest that its transcriptional functions are likely to be very different in cancers

908 in which aberrant MYC expression is the main oncogenic driver compared to *MYCN*-nonamplified  
909 neuroblastomas that are not dependent on MYC overexpression. This notion is supported by the  
910 observation that inhibiting endogenous MYC function in non MYC-driven pancreatic cancer  
911 models leads to decreased recruitment and retention of inflammatory cells<sup>63</sup>. As MYC is an  
912 essential TF in NCCs<sup>64,65</sup>, it is plausible that MYC promotes an immunogenic state by driving a  
913 NCC-specific transcriptional program.

914  
915 We also extended the analysis between cell state and immunogenicity to *MYCN*-amplified  
916 tumors and identified a subset that incorporates both mesenchymal and immunogenic features.  
917 This finding was substantiated by our data showing that expression of functional MHC class I is  
918 retained in some *MYCN*-amplified mesenchymal neuroblastoma cells and is not perturbed by  
919 changes in MYCN levels. Indeed, a robust antitumor immune response is observed during the  
920 early stages of tumor development in Th-MYCN mice and in mouse-human chimeric tumors  
921 derived from human NCCs expressing *MYCN* and oncogenic *ALK*<sup>17</sup>. Considering that these  
922 mouse models are driven by gain of *MYCN* (~4-8 copies of the *MYCN* transgene)<sup>17,52</sup> rather than  
923 the amplification seen in human tumors, and that absolute levels of MYCN protein dictate  
924 transcriptional output<sup>66</sup>, the relatively low MYCN dosage in these tumors may account for their  
925 immunogenicity. These findings, if confirmed in additional data sets, should encourage us to  
926 reconsider the notion that all *MYCN*-amplified tumors are intrinsically immune tolerant and that a  
927 subset may in fact, be capable of inducing an immune response by virtue of their cell state.

928  
929 The mutual exclusivity of the neuronal and immunogenic clusters suggests that  
930 neuroblastomas with characteristics of neuronal differentiation (i.e. adrenergic phenotype) are  
931 weakly immunogenic and thus incapable of inducing an effective immune response. Moreover,  
932 the presence of NCC-derived gene expression signatures among immunogenic tumors indicates  
933 that phenotypic reversal of sympathetic neuronal cells to an NCC-like state could contribute

934 significantly to the antitumor immune response. Such cell state-dependent immunogenic  
935 switching could be mediated by the lineage-specific core regulatory circuitry (CRC) that drives  
936 distinct transcriptomic states in neuroblastoma. Indeed, several TFs that constitute the NCC-like  
937 (mesenchymal) CRC, including interferon regulatory factors 1-3 and IFI16, function as major  
938 drivers of tumor cell-intrinsic innate and adaptive immune responses<sup>67,68</sup>. Furthermore, our data  
939 identify PRRX1, another component of the mesenchymal CRC, as a regulator of MHC class I and  
940 antigen-processing gene expression in neuroblastoma. Interestingly, PRRX1 was not identified  
941 as a candidate regulator of MHC-I expression in genome-wide CRISPR knock-out screens to  
942 identify NF- $\kappa$ B-dependent MHC-I suppressors in neuroblastoma<sup>69</sup>, suggesting that the  
943 mechanisms employed by PRRX1 could be independent of NF- $\kappa$ B activation and may involve  
944 direct transcriptional activation of these genes. In addition, the upregulation of DNA damage  
945 sensor proteins such as IFI16 and STING in mesenchymal neuroblastomas could also contribute  
946 to the increased tumor-infiltrating lymphocyte abundance in these tumors, as suggested by results  
947 in small cell lung cancer<sup>70</sup>.

948  
949 We have also established that the changes in immune gene expression accompanying the  
950 adrenergic to mesenchymal transition are epigenetically regulated. Unlike lineage identity genes  
951 that are regulated by super-enhancers, tumor cell-intrinsic immune genes involved in diverse  
952 immune functions such as the inflammatory response, IFN- $\gamma$  signaling and NK cell recognition,  
953 are governed through changes in promoter structure, achieved by either *de novo* acquisition of  
954 permissive chromatin or an epigenetic switch from PRC2-mediated repression to a permissive  
955 chromatin landscape. Our findings support a role for the PRC2 complex in repressing genes that  
956 encode ligands for the activating NK cell receptor NKG2D in adrenergic neuroblastoma cells and  
957 the use of PRC2 inhibitors to augment the NK cell response against these cells. This approach is  
958 justified on several grounds: our results add to the growing body of evidence for tumor-cell  
959 autonomous function of PRC2 as a barrier to anti-tumor immunity, achieved through inhibition of

960 processes such as MHC expression<sup>11,71</sup>, antigen processing and presentation and inflammatory  
961 cytokine production<sup>72,73</sup>. Moreover, our observation that NKG2D ligands are enriched in  
962 mesenchymal neuroblastomas coupled with the demonstration of the critical effector role of NK  
963 cells in the antitumor immune response against this tumor<sup>51</sup> and the promising responses of  
964 patients with other solid tumors to NKG2D-directed CAR NK cell therapy<sup>74</sup> strengthen this  
965 premise. Considered together, the results of our analysis identify cell lineage as an important  
966 determinant of the immune responsiveness of neuroblastoma and suggest rationales for the use  
967 of immune-based therapies, either alone or in combination with epigenetic inhibitors, against the  
968 two divergent phenotypes that define the lineage state of this pediatric tumor.

969

970

971 **Acknowledgements**

972 We thank Matthew Harlow from the George lab, Sumit Sen Santara, Ying Zhang, and Zhibin  
973 Zhang from the Lieberman lab for helpful discussions. We thank Mark Zimmerman, A. Thomas  
974 Look and Kimberly Stegmaier for sharing cell lines. We are thankful to the following members of  
975 the former Haining lab at DFCI for sharing resources and experimental advice: Ulrike Gerdemann,  
976 Dawn Comstock, Kathleen Yates, Anna Word, and Adrienne Long. The results shown here are in  
977 part based on data curated by the R2: Genomics Analysis and Visualization Platform:  
978 <http://r2.amc.nl/>. This work was supported by a St. Baldrick's Foundation Childhood Cancer  
979 Research Grant (R.E.G. and R.J.) DOD CA191000 (R.E.G. and R.J.) and NIH grants R01-  
980 CA197336; R01-CA148688 (R.E.G). St. S. is a recipient of the Pew Stewart Scholarship. Sa. S.  
981 and M.K. were supported by the Rally Foundation for Childhood Cancer Research and Infinite  
982 Love for Kids Fighting Cancer, B.C.M. by the National Center for Advancing Translational  
983 Sciences/NIH Award KL2 TR002542 and D.N.D. by an Alex's Lemonade Stand Foundation  
984 Young Investigator Fellowship. This manuscript is dedicated to the memory of John R. Gilbert,  
985 Scientific Editor.

986

987

988

989 **Author contributions**

990 Sa.S. and R.E.G. conceived the study. Sa.S., A.C., B.C.M., J.L., and R.E.G. designed the  
991 experiments. Sa.S. performed the molecular, cellular and genomic studies. S.D. conceived and  
992 performed the genomic and computational analysis with inputs from R.D., Sa.S. and R.E.G. Sa.S.,  
993 A.C., and B.C.M. performed the T and NK cell studies. B.S. performed the animal and cloning  
994 experiments. S.Z. performed quantitative analysis of IHC images. H.H. performed the cell  
995 migration assays. M.K., D.N.D., and L.S. contributed to FACS analysis, generation of LDK378-  
996 resistant SH-SY5Y cells, and compound testing, respectively. M.C., R.V., R.J., and St.S.  
997 contributed ideas towards regulation of immune function and cell lineage state. Sa.S., S.D., and  
998 R.E.G. wrote the manuscript with input from all authors.

999

1000

1001

1002

1003 **Competing Interests**

1004 R.J. is a cofounder of Fate Therapeutics, Fulcrum Therapeutics, and Omega Therapeutics and  
1005 an advisor to Dewpoint Therapeutics.

1006 **References**

- 1007 1. Yu, A.L. et al. Anti-GD2 antibody with GM-CSF, interleukin-2, and isotretinoin for  
1008 neuroblastoma. *N Engl J Med* **363**, 1324-34 (2010).
- 1009 2. Cheung, N.K. & Dyer, M.A. Neuroblastoma: developmental biology, cancer genomics and  
1010 immunotherapy. *Nat Rev Cancer* **13**, 397-411 (2013).
- 1011 3. Singh, N. et al. T cells targeting NY-ESO-1 demonstrate efficacy against disseminated  
1012 neuroblastoma. *Oncoimmunology* **5**, e1040216 (2016).
- 1013 4. Park, J.R. et al. Adoptive transfer of chimeric antigen receptor re-directed cytolytic T  
1014 lymphocyte clones in patients with neuroblastoma. *Mol Ther* **15**, 825-33 (2007).
- 1015 5. Pule, M.A. et al. Virus-specific T cells engineered to coexpress tumor-specific receptors:  
1016 persistence and antitumor activity in individuals with neuroblastoma. *Nat Med* **14**, 1264-  
1017 70 (2008).
- 1018 6. Louis, C.U. et al. Antitumor activity and long-term fate of chimeric antigen receptor-  
1019 positive T cells in patients with neuroblastoma. *Blood* **118**, 6050-6 (2011).
- 1020 7. Merchant, M.S. et al. Phase I Clinical Trial of Ipilimumab in Pediatric Patients with  
1021 Advanced Solid Tumors. *Clin Cancer Res* **22**, 1364-70 (2016).
- 1022 8. Davis, K.L. et al. Nivolumab in children and young adults with relapsed or refractory solid  
1023 tumours or lymphoma (ADVL1412): a multicentre, open-label, single-arm, phase 1-2 trial.  
1024 *Lancet Oncol* **21**, 541-550 (2020).
- 1025 9. Richards, R.M., Sotillo, E. & Majzner, R.G. CAR T Cell Therapy for Neuroblastoma. *Front*  
1026 *Immunol* **9**, 2380 (2018).
- 1027 10. Bernards, R., Dessain, S.K. & Weinberg, R.A. N-myc amplification causes down-  
1028 modulation of MHC class I antigen expression in neuroblastoma. *Cell* **47**, 667-74 (1986).
- 1029 11. Burr, M.L. et al. An Evolutionarily Conserved Function of Polycomb Silences the MHC Class  
1030 I Antigen Presentation Pathway and Enables Immune Evasion in Cancer. *Cancer Cell* **36**,  
1031 385-401 e8 (2019).
- 1032 12. Raffaghello, L. et al. Multiple defects of the antigen-processing machinery components in  
1033 human neuroblastoma: immunotherapeutic implications. *Oncogene* **24**, 4634-44 (2005).
- 1034 13. Raffaghello, L. et al. Downregulation and/or release of NKG2D ligands as immune evasion  
1035 strategy of human neuroblastoma. *Neoplasia* **6**, 558-68 (2004).
- 1036 14. Castriconi, R. et al. Identification of 4Ig-B7-H3 as a neuroblastoma-associated molecule  
1037 that exerts a protective role from an NK cell-mediated lysis. *Proc Natl Acad Sci U S A* **101**,  
1038 12640-5 (2004).
- 1039 15. Coughlin, C.M. et al. Immunosurveillance and survivin-specific T-cell immunity in children  
1040 with high-risk neuroblastoma. *J Clin Oncol* **24**, 5725-34 (2006).
- 1041 16. Betancur, P.A. et al. A CD47-associated super-enhancer links pro-inflammatory signalling  
1042 to CD47 upregulation in breast cancer. *Nat Commun* **8**, 14802 (2017).
- 1043 17. Cohen, M.A. et al. Formation of Human Neuroblastoma in Mouse-Human Neural Crest  
1044 Chimeras. *Cell Stem Cell* **26**, 579-592 e6 (2020).
- 1045 18. Asgharzadeh, S. et al. Clinical significance of tumor-associated inflammatory cells in  
1046 metastatic neuroblastoma. *J Clin Oncol* **30**, 3525-32 (2012).
- 1047 19. Song, L. et al. Valpha24-invariant NKT cells mediate antitumor activity via killing of tumor-  
1048 associated macrophages. *J Clin Invest* **119**, 1524-36 (2009).



- 1049 20. Mao, Y. *et al.* Targeting Suppressive Myeloid Cells Potentiates Checkpoint Inhibitors to  
1050 Control Spontaneous Neuroblastoma. *Clin Cancer Res* **22**, 3849-59 (2016).
- 1051 21. Tran, H.C. *et al.* TGFbetaR1 Blockade with Galunisertib (LY2157299) Enhances Anti-  
1052 Neuroblastoma Activity of the Anti-GD2 Antibody Dinutuximab (ch14.18) with Natural  
1053 Killer Cells. *Clin Cancer Res* **23**, 804-813 (2017).
- 1054 22. Brodeur, G.M., Seeger, R.C., Schwab, M., Varmus, H.E. & Bishop, J.M. Amplification of N-  
1055 myc in untreated human neuroblastomas correlates with advanced disease stage. *Science*  
1056 **224**, 1121-4 (1984).
- 1057 23. Seeger, R.C. *et al.* Association of multiple copies of the N-myc oncogene with rapid  
1058 progression of neuroblastomas. *N Engl J Med* **313**, 1111-6 (1985).
- 1059 24. Layer, J.P. *et al.* Amplification of N-Myc is associated with a T-cell-poor microenvironment  
1060 in metastatic neuroblastoma restraining interferon pathway activity and chemokine  
1061 expression. *Oncoimmunology* **6**, e1320626 (2017).
- 1062 25. Wei, J.S. *et al.* Clinically Relevant Cytotoxic Immune Cell Signatures and Clonal Expansion  
1063 of T-Cell Receptors in High-Risk MYCN-Not-Amplified Human Neuroblastoma. *Clin Cancer*  
1064 *Res* **24**, 5673-5684 (2018).
- 1065 26. Brandetti, E. *et al.* MYCN is an immunosuppressive oncogene dampening the expression  
1066 of ligands for NK-cell-activating receptors in human high-risk neuroblastoma.  
1067 *Oncoimmunology* **6**, e1316439 (2017).
- 1068 27. Valentijn, L.J. *et al.* Functional MYCN signature predicts outcome of neuroblastoma  
1069 irrespective of MYCN amplification. *Proc Natl Acad Sci U S A* **109**, 19190-5 (2012).
- 1070 28. Durbin, B.P., Hardin, J.S., Hawkins, D.M. & Rocke, D.M. A variance-stabilizing  
1071 transformation for gene-expression microarray data. *Bioinformatics* **18 Suppl 1**, S105-10  
1072 (2002).
- 1073 29. Lin, S.M., Du, P., Huber, W. & Kibbe, W.A. Model-based variance-stabilizing  
1074 transformation for Illumina microarray data. *Nucleic Acids Res* **36**, e11 (2008).
- 1075 30. McInnes L, H.J. UMAP: Uniform manifold approximation and projection for dimension  
1076 reduction. *arXiv preprint arXiv:1802.03426*. (2018).
- 1077 31. Becht, E. *et al.* Dimensionality reduction for visualizing single-cell data using UMAP. *Nat*  
1078 *Biotechnol* (2018).
- 1079 32. Brodeur, G.M. *et al.* Revisions of the international criteria for neuroblastoma diagnosis,  
1080 staging, and response to treatment. *Journal of Clinical Oncology* **11**, 1466-1477 (1993).
- 1081 33. Cohn, S.L. *et al.* The International Neuroblastoma Risk Group (INRG) classification system:  
1082 an INRG Task Force report. *J Clin Oncol* **27**, 289-97 (2009).
- 1083 34. Satija, R., Farrell, J.A., Gennert, D., Schier, A.F. & Regev, A. Spatial reconstruction of single-  
1084 cell gene expression data. *Nat Biotechnol* **33**, 495-502 (2015).
- 1085 35. Spranger, S. *et al.* Up-regulation of PD-L1, IDO, and T(regs) in the melanoma tumor  
1086 microenvironment is driven by CD8(+) T cells. *Sci Transl Med* **5**, 200ra116 (2013).
- 1087 36. Wherry, E.J. & Kurachi, M. Molecular and cellular insights into T cell exhaustion. *Nat Rev*  
1088 *Immunol* **15**, 486-99 (2015).
- 1089 37. Boeva, V. *et al.* Heterogeneity of neuroblastoma cell identity defined by transcriptional  
1090 circuitries. *Nat Genet* **49**, 1408-1413 (2017).
- 1091 38. van Groningen, T. *et al.* Neuroblastoma is composed of two super-enhancer-associated  
1092 differentiation states. *Nat Genet* **49**, 1261-1266 (2017).

- 1093 39. Bindea, G. *et al.* Spatiotemporal dynamics of intratumoral immune cells reveal the  
1094 immune landscape in human cancer. *Immunity* **39**, 782-95 (2013).
- 1095 40. Wang, L.L. *et al.* Augmented expression of MYC and/or MYCN protein defines highly  
1096 aggressive MYC-driven neuroblastoma: a Children's Oncology Group study. *Br J Cancer*  
1097 **113**, 57-63 (2015).
- 1098 41. Casey, S.C. *et al.* MYC regulates the antitumor immune response through CD47 and PD-  
1099 L1. *Science* **352**, 227-31 (2016).
- 1100 42. Cursons, J. *et al.* A Gene Signature Predicting Natural Killer Cell Infiltration and Improved  
1101 Survival in Melanoma Patients. *Cancer Immunol Res* **7**, 1162-1174 (2019).
- 1102 43. Newman, A.M. *et al.* Robust enumeration of cell subsets from tissue expression profiles.  
1103 *Nat Methods* **12**, 453-7 (2015).
- 1104 44. Hu, X. *et al.* Landscape of B cell immunity and related immune evasion in human cancers.  
1105 *Nat Genet* **51**, 560-567 (2019).
- 1106 45. Ross, R.A., Spengler, B.A. & Biedler, J.L. Coordinate morphological and biochemical  
1107 interconversion of human neuroblastoma cells. *J Natl Cancer Inst* **71**, 741-7 (1983).
- 1108 46. Cohn, S.L. *et al.* Prolonged N-myc protein half-life in a neuroblastoma cell line lacking N-  
1109 myc amplification. *Oncogene* **5**, 1821-7 (1990).
- 1110 47. Debryne, D.N. *et al.* ALK inhibitor resistance in ALK(F1174L)-driven neuroblastoma is  
1111 associated with AXL activation and induction of EMT. *Oncogene* **35**, 3681-91 (2016).
- 1112 48. Chipumuro, E. *et al.* CDK7 inhibition suppresses super-enhancer-linked oncogenic  
1113 transcription in MYCN-driven cancer. *Cell* **159**, 1126-1139 (2014).
- 1114 49. Durbin, A.D. *et al.* Selective gene dependencies in MYCN-amplified neuroblastoma  
1115 include the core transcriptional regulatory circuitry. *Nat Genet* **50**, 1240-1246 (2018).
- 1116 50. Margueron, R. & Reinberg, D. The Polycomb complex PRC2 and its mark in life. *Nature*  
1117 **469**, 343-9 (2011).
- 1118 51. Kroesen, M. *et al.* A transplantable TH-MYCN transgenic tumor model in C57Bl/6 mice for  
1119 preclinical immunological studies in neuroblastoma. *Int J Cancer* **134**, 1335-45 (2014).
- 1120 52. Weiss, W.A., Aldape, K., Mohapatra, G., Feuerstein, B.G. & Bishop, J.M. Targeted  
1121 expression of MYCN causes neuroblastoma in transgenic mice. *EMBO J* **16**, 2985-95  
1122 (1997).
- 1123 53. Clarke, S.R. *et al.* Characterization of the ovalbumin-specific TCR transgenic line OT-I: MHC  
1124 elements for positive and negative selection. *Immunol Cell Biol* **78**, 110-7 (2000).
- 1125 54. Cibrian, D. & Sanchez-Madrid, F. CD69: from activation marker to metabolic gatekeeper.  
1126 *Eur J Immunol* **47**, 946-953 (2017).
- 1127 55. Uhrberg, M. The CD107 mobilization assay: viable isolation and immunotherapeutic  
1128 potential of tumor-cytolytic NK cells. *Leukemia* **19**, 707-9 (2005).
- 1129 56. Molfetta, R. *et al.* Regulation of NKG2D Expression and Signaling by Endocytosis. *Trends*  
1130 *Immunol* **37**, 790-802 (2016).
- 1131 57. Qi, W. *et al.* An allosteric PRC2 inhibitor targeting the H3K27me3 binding pocket of EED.  
1132 *Nat Chem Biol* **13**, 381-388 (2017).
- 1133 58. Dongre, A. & Weinberg, R.A. New insights into the mechanisms of epithelial-mesenchymal  
1134 transition and implications for cancer. *Nat Rev Mol Cell Biol* **20**, 69-84 (2019).
- 1135 59. Malladi, S. *et al.* Metastatic Latency and Immune Evasion through Autocrine Inhibition of  
1136 WNT. *Cell* **165**, 45-60 (2016).

- 1137 60. Pereira, B.I. *et al.* Senescent cells evade immune clearance via HLA-E-mediated NK and  
1138 CD8(+) T cell inhibition. *Nat Commun* **10**, 2387 (2019).
- 1139 61. Shin, H. & Wherry, E.J. CD8 T cell dysfunction during chronic viral infection. *Curr Opin*  
1140 *Immunol* **19**, 408-15 (2007).
- 1141 62. Kortlever, R.M. *et al.* Myc Cooperates with Ras by Programming Inflammation and  
1142 Immune Suppression. *Cell* **171**, 1301-1315 e14 (2017).
- 1143 63. Sodikin, N.M. *et al.* Endogenous Myc maintains the tumor microenvironment. *Genes Dev*  
1144 **25**, 907-16 (2011).
- 1145 64. Bellmeyer, A., Krase, J., Lindgren, J. & LaBonne, C. The protooncogene c-myc is an  
1146 essential regulator of neural crest formation in xenopus. *Dev Cell* **4**, 827-39 (2003).
- 1147 65. Rada-Iglesias, A. *et al.* Epigenomic annotation of enhancers predicts transcriptional  
1148 regulators of human neural crest. *Cell Stem Cell* **11**, 633-48 (2012).
- 1149 66. Zeid, R. *et al.* Enhancer invasion shapes MYCN-dependent transcriptional amplification in  
1150 neuroblastoma. *Nat Genet* **50**, 515-523 (2018).
- 1151 67. Chang, C.H., Hammer, J., Loh, J.E., Fodor, W.L. & Flavell, R.A. The activation of major  
1152 histocompatibility complex class I genes by interferon regulatory factor-1 (IRF-1).  
1153 *Immunogenetics* **35**, 378-84 (1992).
- 1154 68. Unterholzner, L. *et al.* IFI16 is an innate immune sensor for intracellular DNA. *Nat*  
1155 *Immunol* **11**, 997-1004 (2010).
- 1156 69. Spel, L. *et al.* Nedd4-Binding Protein 1 and TNFAIP3-Interacting Protein 1 Control MHC-1  
1157 Display in Neuroblastoma. *Cancer Res* **78**, 6621-6631 (2018).
- 1158 70. Sen, T. *et al.* Targeting DNA Damage Response Promotes Antitumor Immunity through  
1159 STING-Mediated T-cell Activation in Small Cell Lung Cancer. *Cancer Discov* **9**, 646-661  
1160 (2019).
- 1161 71. Ennishi, D. *et al.* Molecular and Genetic Characterization of MHC Deficiency Identifies  
1162 EZH2 as Therapeutic Target for Enhancing Immune Recognition. *Cancer Discov* **9**, 546-563  
1163 (2019).
- 1164 72. Zingg, D. *et al.* The Histone Methyltransferase Ezh2 Controls Mechanisms of Adaptive  
1165 Resistance to Tumor Immunotherapy. *Cell Rep* **20**, 854-867 (2017).
- 1166 73. Peng, D. *et al.* Epigenetic silencing of TH1-type chemokines shapes tumour immunity and  
1167 immunotherapy. *Nature* **527**, 249-53 (2015).
- 1168 74. Xiao, L. *et al.* Adoptive Transfer of NKG2D CAR mRNA-Engineered Natural Killer Cells in  
1169 Colorectal Cancer Patients. *Mol Ther* **27**, 1114-1125 (2019).
- 1170 75. Schindelin, J. *et al.* Fiji: an open-source platform for biological-image analysis. *Nat*  
1171 *Methods* **9**, 676-82 (2012).
- 1172 76. Kametsky, L. *et al.* Improved structure, function and compatibility for CellProfiler:  
1173 modular high-throughput image analysis software. *Bioinformatics* **27**, 1179-80 (2011).
- 1174 77. Love, M.I., Huber, W. & Anders, S. Moderated estimation of fold change and dispersion  
1175 for RNA-seq data with DESeq2. *Genome Biol* **15**, 550 (2014).
- 1176 78. Zhu, X. *et al.* Single-Cell Clustering Based on Shared Nearest Neighbor and Graph  
1177 Partitioning. *Interdiscip Sci* **12**, 117-130 (2020).
- 1178 79. Russo, P.S.T. *et al.* CEMiTool: a Bioconductor package for performing comprehensive  
1179 modular co-expression analyses. *BMC Bioinformatics* **19**, 56 (2018).

- 1180 80. Yu, G., Wang, L.G., Han, Y. & He, Q.Y. clusterProfiler: an R package for comparing biological  
1181 themes among gene clusters. *OMICS* **16**, 284-7 (2012).
- 1182 81. Alexopoulos, E.C. Introduction to multivariate regression analysis. *Hippokratia* **14**, 23-8  
1183 (2010).
- 1184 82. Das, S. & Bansal, M. Variation of gene expression in plants is influenced by gene  
1185 architecture and structural properties of promoters. *PLoS One* **14**, e0212678 (2019).
- 1186 83. Debruyne, D.N. et al. BORIS promotes chromatin regulatory interactions in treatment-  
1187 resistant cancer cells. *Nature* **572**, 676-680 (2019).
- 1188
- 1189

1190 **Methods**

1191 **Cell culture**

1192 Human neuroblastoma (NB) cell lines (Kelly, NBL-S, CHP-212, SH-SY5Y, SH-EP, CHLA-20,  
1193 NB69, SK-N-FI) were obtained from the Children's Oncology Group cell line bank. ACN, GI-ME-  
1194 N, NB-EbC1 were kind gifts from A. Thomas Look and Kimberly Stegmaier at Dana Farber Cancer  
1195 Institute (DFCI). NB-9464 cells were provided by To-Ha Thai at Beth Israel Deaconess Medical  
1196 Center, Boston, MA. The cell lines were authenticated through STR analyses at the DFCI Core  
1197 facility and were routinely tested for mycoplasma. All NB cells were grown in RPMI-1640 medium  
1198 (Invitrogen) supplemented with 10% fetal bovine serum (FBS) (Invitrogen) and 1%  
1199 penicillin/streptomycin (Life Technologies). HEK293T cells obtained from the American Type  
1200 Culture Collection (ATCC) were grown in DMEM (Invitrogen) supplemented with 10% FBS and  
1201 1% penicillin/streptomycin (Life Technologies). SH-SY5Y cells resistant to the ALK inhibitor  
1202 ceritinib (LDK378) were described previously (Debruyne et al., 2016) and were grown in complete  
1203 RPMI-1640 in the presence of 1.5  $\mu$ M ceritinib.

1204

1205 **Generation of PRRX1-inducible cell lines**

1206 Lentiviral vectors containing wild type and DNA-binding mutants of PRRX1 were generated by  
1207 cloning cDNAs encoding full length or homeodomain deletions of the human PRRX1A sequence  
1208 into the pInducer20 lentiviral plasmid (gift from Stephen Elledge, Addgene plasmid #44012). The  
1209 DNA-binding mutants harbor individual deletions of the three  $\alpha$ -helices ( $\Delta$ H1,  $\Delta$ H2 and  $\Delta$ H3) within  
1210 the PRRX1 homeodomain (amino acids (aa) 94-153). Amino acid boundaries of the deleted  
1211 regions are as follows:  $\Delta$ H1 (aa 103-116);  $\Delta$ H2 (aa 121-131);  $\Delta$ H3 (aa 135-151). The lentivirus  
1212 was packaged by co-transfection of pInducer20 plasmid with the helper plasmids, pCMV-  
1213 deltaR8.91 and pMD2.G-VSV-G into HEK293T cells using the TransIT-LT1 Transfection Reagent  
1214 (Mirus Bio LLC). Virus-containing supernatants were collected 48 hr after transfection. SH-SY5Y  
1215 cells were transduced with the viral supernatant in the presence of 8  $\mu$ g/ml polybrene (Sigma-

1216 Aldrich) and 24 hr later selected using neomycin (G418) (5 µg/ml). Induction of gene expression  
1217 was achieved by treating cells every 2–3 days with doxycycline (dox; 200 ng/ml) in RPMI-1640  
1218 medium supplemented with 10% tetracycline-negative fetal bovine serum (tet-free FBS) (Gemini  
1219 Bio-Products) and 1% penicillin/streptomycin.

1220

### 1221 **MYCN shRNA knockdown and IFN-γ treatment**

1222 The pLKO.1 shRNA construct targeting MYCN (TRCN0000020694) was purchased from Sigma-  
1223 Aldrich and the pLKO.1 GFP shRNA was a gift from D. Sabatini (Addgene plasmid #30323).  
1224 Lentiviral packaging was performed in HEK293T cells as described above and viral supernatant  
1225 was collected on days 2 and 3 after transfection. Kelly human NB cells were transduced with the  
1226 viral supernatant in the presence of 8 µg/ml polybrene (Sigma-Aldrich) and 24 h later selected  
1227 using puromycin (1 µg/ml) for 2 days. Puromycin-resistant Kelly cells were cultured for an  
1228 additional 6 days. Cells were then treated with 100 ng/ml of recombinant human IFNγ (Biolegend)  
1229 for 24h, following which they were harvested for analysis of RNA and protein expression.

1230

### 1231 **FACS analysis for cell surface protein staining**

1232 For each staining reaction 1 x 10<sup>6</sup> live cells were placed in a 12 x 75 mm polystyrene round bottom  
1233 tube (Falcon), resuspended in 100 µl 1x PBS and stained with the Zombie near-infrared (Zombie  
1234 NIR) viability dye (BioLegend) at a 1:1,000 dilution for 15 minutes at RT. Cells were then washed  
1235 once in FACS buffer (0.5% BSA in 1x PBS), resuspended in 100 µl of FACS buffer and incubated  
1236 in 5 µl of Human TruStain FcX™ (Fc receptor blocking solution, BioLegend) for 10 minutes at RT.  
1237 Next, appropriate volumes of conjugated fluorescent primary antibodies at predetermined  
1238 optimum concentrations were added and incubated on ice for 20 minutes in the dark. Cells were  
1239 then washed once in 2 ml of FACS buffer by centrifugation at 1500 rpm for 5 minutes. All FACS  
1240 samples were analyzed on a FACSCalibur flow cytometer (Becton Dickinson) using Cell Quest  
1241 software (Becton Dickinson). A minimum of 50,000 events was counted per sample and used for



1242 further analysis. Data were analyzed using FlowJo v10 software (Becton Dickinson). The following  
1243 primary antibodies were used: PE-HLA (Biolegend; clone W6/32), PE-MICA/B (Biolegend clone  
1244 6D4), PE-ULBP2 (R&D Systems; clone 165903), PE-ULBP3 (R&D Systems; clone 166510), PE-  
1245 H-2Kb (Biolegend AF6-88.5), PE-H-2Kb SIINFEKL (Biolegend; clone 25-D1.16), PE-mouse  
1246 IgG2a k isotype control (Biolegend MOPC-173), PE- mouse IgG1 k isotype control (MOPC-21).

1247

#### 1248 **Cell viability assay**

1249 SH-SY5Y parental and SH-SY5Y LDK-resistant cells were seeded in 96-well plates at a density  
1250 of  $2 \times 10^3$  cells/well. After 24 h, cells were treated with increasing concentrations of LDK378  
1251 (ranging from 1 nM to 10  $\mu$ M) dissolved in Dimethyl Sulfoxide (DMSO). DMSO solvent without the  
1252 drug served as a negative control. Following 72 h incubation, cells were analyzed for viability  
1253 using the CellTiter-Glo Luminescent Cell Viability Assay (Promega) according to the  
1254 manufacturer's instructions. Drug concentrations that inhibited cell growth by 50% (IC<sub>50</sub>) were  
1255 determined using a non-linear regression curve fit with GraphPad Prism 8 software.

1256

#### 1257 **Cell migration and invasion assays**

1258 Cell migration was measured using transwell chambers (Falcon). NB9464-H-2Kb<sup>lo</sup> or  
1259 NB9464-H-2Kb<sup>hi</sup> cells in serum-free medium ( $0.5 \times 10^6$  cells/ml) were added to the upper  
1260 chamber and inserts (8  $\mu$ m pore size) were placed in the lower chamber containing medium  
1261 with 10% FBS. Following incubation at 37° C for 8 h, cells that migrated to the lower chamber  
1262 were fixed with methanol and stained with crystal violet (Sigma-Aldrich). The stained cells  
1263 were photographed with a light microscope at 100X magnification and migration was  
1264 quantified as the number of cells per high power field. Cell invasion was measured using the  
1265 fluorometric QCM<sup>TM</sup> ECMatrix<sup>TM</sup> Cell Invasion Assay (Millipore). NB9464-H-2Kb<sup>lo</sup> or NB9464-  
1266 H-2Kb<sup>hi</sup> cells in serum-free medium ( $0.5 \times 10^6$  cells/ml) were added to the upper chamber

1267 and inserts (8  $\mu\text{m}$  pore size) placed in the lower chamber containing medium with 10% FBS.  
1268 Following incubation at 37° C for 24 h, cell invasion was measured according to  
1269 manufacturer's instructions.

1270

#### 1271 **EED226 treatment**

1272 5 x10<sup>5</sup> SH-SY5Y cells were seeded into 10 cm plates and treated with either 5  $\mu\text{M}$  EED226  
1273 (Selleck Chemicals) or DMSO (vehicle control) for 6-8 days, following which samples were  
1274 harvested for downstream analyses. Cells were replenished with fresh media containing DMSO  
1275 or EED226 every 2 days.

1276

#### 1277 **Compounds**

1278 Ceritinib (LDK378) and EED226 were purchased from Selleck Chemicals. Doxycycline and  
1279 dimethyl Sulfoxide (DMSO) was purchased from Sigma-Aldrich.

1280

#### 1281 **RNA extraction and q-PCR**

1282 Total RNA was isolated using the RNAeasy Mini kit (Qiagen). Purified RNA was reverse  
1283 transcribed to cDNA using Superscript IV VILO master mix (Thermo Fisher Scientific) following  
1284 the manufacturer's protocol. Quantitative PCR was performed using 1  $\mu\text{l}$  cDNA, 1x PowerTrack  
1285 SYBR Green PCR master mix (Thermo Fisher Scientific) and PCR primers (200 nM) in a total  
1286 volume of 25  $\mu\text{l}$  and analyzed on a ViiA 7 Real-Time PCR system (Thermo Fisher Scientific). Each  
1287 individual biological sample was amplified in technical duplicate and normalized to GAPDH as an  
1288 internal control. Relative expression was calculated according to the  $2^{-\Delta\Delta\text{CT}}$  quantification method  
1289 (Livak and Schmittgen, 2001). PCR primer sequences are shown in Table S5.

1290

1291

1292

1293 **Synthetic RNA spike-in and RNA-sequencing**

1294 RNA-sequencing was performed on the following human NB cell lines: Kelly, NBL-S, CHP-212,  
1295 SH-SY5Y, SH-SY5Y LDK-resistant and SH-EP. Biological duplicates (5 x 10<sup>6</sup> cells per replicate)  
1296 were homogenized in 1 ml of TRIzol Reagent (Invitrogen) and purified using the mirVANA miRNA  
1297 isolation kit (Ambion) following the manufacturer's instructions. Total RNA was treated with DNA-  
1298 free™ DNase I (Ambion), spiked-in with ERCC RNA Spike-In Mix (Ambion) and analyzed on an  
1299 Agilent 2100 Bioanalyzer (Agilent Technologies) for integrity. Sequencing libraries were prepared  
1300 using LP-KAPA mRNA Hyper Prep and sequenced using Illumina HiSeq for 40 bases.

1301

1302 **Western blotting**

1303 Cells were homogenized in NP40 lysis buffer (Life Technologies) containing 1× cOmplete EDTA-  
1304 free protease inhibitor cocktail and 1x PhosSTOP (Roche). Protein concentration was measured  
1305 using the DC Protein Assay (Bio-Rad). 100 µg total protein was denatured in LDS sample buffer  
1306 (Invitrogen), separated on pre-cast 4-12% Bis-Tris gels (Invitrogen) and transferred to  
1307 nitrocellulose membranes (Bio-Rad). Membranes were blocked using 5% dry milk (Sigma-Aldrich)  
1308 in Tris-buffered saline (TBS) supplemented with 0.2% Tween-20 (TBS-T) for 1 hr, and incubated  
1309 overnight with primary antibody in blocking buffer at 4 °C. Chemiluminescent detection was  
1310 performed with appropriate HRP-conjugated secondary antibodies and enhanced  
1311 chemiluminescence reagents (Thermo Scientific). Images were developed using Genemate Blue  
1312 ultra-autoradiography film (VWR).

1313

1314 **Antibodies**

1315 The following primary antibodies were used: MYCN (Cat #51705), MYC (13987), GATA3 (5852),  
1316 TAP1 (12341), TAP2 (12259), LMP7 (13635), NOTCH1 (3608), cleaved NOTCH1 (4147), SOX9  
1317 (82630), AXL (8661), GAPDH (2118), β-actin (3700), IRF1 (8478), VIM (5741), YAP1 (4912),

1318 TAZ1 (4883) (Cell Signalling Technologies (CST)); PHOX2B (Abcam;183741), FN1 (RnD  
1319 systems; AF1918), LMP2 (Santa Cruz; 271354) and PRRX1 (Santa Cruz; 293386).

1320

### 1321 **Chromatin immunoprecipitation-quantitative PCR (ChIP-qPCR)**

1322 Soluble chromatin was prepared as above from SH-SY5Y cells without or with dox-inducible  
1323 PRRX1 expression (200 ng/ml dox for 10 days). ChIP was performed as described in the  
1324 preceding section using the following antibodies: H3K4me3 (Abcam 8580), H3K27me3 (Millipore  
1325 07-729), EZH2 (CST 5246), SUZ12 (CST 3737), EED (Millipore 17-10034), rabbit IgG (CST  
1326 2729). Purified ChIP DNA was dissolved in 60  $\mu$ l of 1x TE. Quantitative PCR was performed on a  
1327 ViiA 7 Real-Time PCR system (Thermo Fisher Scientific) with 1  $\mu$ l purified DNA, 1x PowerTrack  
1328 SYBR Green PCR master mix (Thermo Fisher Scientific) and PCR primers (200 nM) against the  
1329 genomic regions of interest. Each individual biological sample was amplified in technical  
1330 duplicate. Relative enrichment was quantified using the percent input method. PCR primer  
1331 sequences are shown in Table S5.

1332

### 1333 **Chromatin immunoprecipitation-sequencing (ChIP-seq)**

1334 Approximately  $10\text{-}12 \times 10^7$  cells were crosslinked with 1% formaldehyde (Thermo Scientific) for  
1335 10 min at room temperature (RT) followed by quenching with 0.125 M glycine for 5 min. The cells  
1336 were then washed twice in ice-cold 1x Phosphate Buffered Saline (PBS), and the cell pellet  
1337 equivalent of  $4 \times 10^7$  cells were flash frozen and stored at  $-80^\circ\text{C}$ . Crosslinked cells were lysed in  
1338 lysis buffer 1 (50 mM HEPES-KOH pH7.5, 140 mM NaCl, 1 mM EDTA, 10% glycerol, 0.5% NP40,  
1339 0.25% Triton X-100). The resultant nuclear pellet was washed once in lysis buffer 2 (10 mM Tris-  
1340 HCl pH 8, 200 mM NaCl, 1 mM EDTA, 0.5 mM EGTA) and then resuspended in sonication buffer  
1341 (50 mM HEPES-KOH pH 7.5, 140 mM NaCl, 1mM EDTA, 1mM EGTA, 1% Triton X-100, 0.1%  
1342 sodium deoxycholate, 0.2% SDS). Chromatin was sheared using a Misonix 3000 sonicator  
1343 (Misonix) and at the following settings: 10 cycles, each for 30 s on, followed by 1 min off, at a

1344 power of approximately 20 W. The lysates were then centrifuged for 15 min at 4 °C, supernatants  
1345 collected and diluted with an equal amount of sonication buffer without SDS to reach a final  
1346 concentration of 0.1% SDS. For each ChIP, the chromatin equivalent of  $1 \times 10^7$  cells was used.  
1347 50  $\mu$ l of Protein G Dynabeads per sample (Invitrogen) were blocked with 0.5% BSA (w/v) in 1x  
1348 PBS. Magnetic beads were loaded with the following antibodies: 10  $\mu$ g of H3K27me3 (Millipore  
1349 07-729); 3  $\mu$ g of H3K27ac (Abcam 4729), and 3  $\mu$ g of H3K4me3 (Abcam 8580) and incubated  
1350 overnight at 4°C. The sonicated lysates were then incubated overnight at 4°C with the antibody-  
1351 bound magnetic beads, washed with low-salt buffer (50 mM HEPES-KOH (pH 7.5), 0.1% SDS,  
1352 1% Triton X-100, 0.1% sodium deoxycholate, 1 mM EGTA, 1 mM EDTA, 140 mM NaCl and 1x  
1353 complete protease inhibitor), high-salt buffer (50 mM HEPES-KOH (pH 7.5), 0.1% SDS, 1% Triton  
1354 X-100, 0.1% sodium deoxycholate, 1 mM EGTA, 1 mM EDTA, 500 mM NaCl and 1x complete  
1355 protease inhibitor), LiCl buffer (20 mM Tris-HCl (pH 8), 0.5% NP-40, 0.5% sodium deoxycholate,  
1356 1 mM EDTA, 250 mM LiCl and 1x complete protease inhibitor) and Tris-EDTA (TE) buffer. DNA  
1357 was then eluted in elution buffer (50 mM Tris-HCl (pH 8.0), 10 mM EDTA, 1% SDS), and high-  
1358 speed centrifugation performed to pellet the magnetic beads and collect the supernatants. The  
1359 crosslinking was reversed overnight at 65° C in the presence of 300 mM NaCl. RNA and protein  
1360 were digested using RNase A and proteinase K, respectively, and DNA was purified with phenol-  
1361 chloroform extraction and ethanol precipitation. Purified ChIP DNA was used to prepare Illumina  
1362 multiplexed sequencing libraries using the NEBNext Ultra II DNA Library Prep kit and the  
1363 NEBNext Multiplex Oligos for Illumina (New England Biolabs) according to the manufacturer's  
1364 protocol. Libraries with distinct indices were multiplexed and run together on the Illumina NextSeq  
1365 500 (SY-415-1001, Illumina) for 75 base pairs.

1366

### 1367 **IFN-gamma induction and antigen presentation in NB9464 cells**

1368 Approximately  $1 \times 10^6$  cells were seeded onto 10 cm plates. 24 hr later, adherent cells were  
1369 treated with recombinant mouse IFN- $\gamma$  (Biolegend) for 24h and harvested for H-2Kb analysis

1370 using FACS as described above. For antigen presentation assays, cells treated with IFN- $\gamma$  were  
1371 pulsed with SIINFEKL (OVA peptide) at 37°C. Cells were subsequently washed with 1x PBS to  
1372 remove unbound peptide and processed for analysis using FACS.

1373

#### 1374 **T cell activation assays**

1375 OT-I T cell receptor (TCR) transgenic mice were purchased from Jackson Laboratories (Bar  
1376 Harbor, ME). Splenocytes were harvested and T cells were subsequently isolated from the  
1377 mononuclear layer using Ficoll separation and directly used in co-culture assays. Successful  
1378 enrichment of CD8<sup>+</sup> T cells was confirmed by FACS analysis using the FITC-CD8 antibody. Cells  
1379 were pulsed with SIINFEKL (OVA peptide) at 37 °C, to bind to cell surface H-2Kb. Cells were  
1380 subsequently washed with 1x PBS to remove unbound peptide and then co-cultured with  
1381 unstimulated OT-1 T cells for 24 h. OT-I cells were then harvested, and sequentially stained with  
1382 the Zombie NIR viability dye and FITC-CD8, PE-CD69 antibodies, followed by fixation with 1%  
1383 paraformaldehyde (Polysciences, Inc). OT-1 cells were analyzed by flow cytometry using a  
1384 FACSCanto II cell analyzer (Becton Dickinson) and FlowJo V10 software (Becton Dickinson).

1385

#### 1386 **In vitro assays for NKG2D binding**

1387 SH-SY5Y parental, SH-SY5Y LDK-resistant, and SH-EP cells were incubated with recombinant  
1388 human NKG2D-Fc chimeric protein or an equivalent concentration of human IgG , following which  
1389 cells were washed, and sequentially stained with the Zombie NIR viability dye as described above  
1390 followed by incubation with an Alexa 647-conjugated anti-human IgG antibody for 30 minutes.  
1391 Cells were washed in FACS buffer and analyzed by flow cytometry using a FACSCanto II cell  
1392 analyzer (Becton Dickinson) and FlowJo V10 software (Becton Dickinson).

1393

1394

1395



1396 **NK cell degranulation assays**

1397 Human peripheral blood NK cells were isolated from blood collars using a RosetteSep™ human  
1398 NK cell enrichment cocktail (STEMCELL Technologies). NK cells were then co-cultured for 4 h  
1399 with confluent monolayers of SH-SY5Y parental, SH-SY5Y LDK-resistant, and SH-EP cells at in  
1400 the presence of CD107a antibody (Biolegend). Additionally, co-cultures of NK cells and 721.221  
1401 B cells were included as positive controls for degranulation. At the endpoint, NK cells were  
1402 harvested, stained with Zombie Yellow (Biolegend) and CD56 FITC (or NKp46 AlexaFluor 647™)  
1403 and NKG2D PE (or mouse IgG1 PE) antibodies (Biolegend), followed by fixation with 1%  
1404 paraformaldehyde (Polysciences, Inc). For the NKG2D blocking assay, NK cells were incubated  
1405 with purified anti-NKG2D antibody or mouse IgG1 isotype control at 37 °C, following which the  
1406 degranulation assay was performed as detailed above. NK cells were analyzed by flow cytometry  
1407 using a FACS Canto II (Becton Dickinson) and FlowJo V10 software (Becton Dickinson).

1408

1409 **Data sets**

1410 Publicly available RNA-seq data (GEO accession number GSE49711/GSE62564) from a cohort  
1411 of 498 primary human neuroblastoma tumors, microarray expression data from 394  
1412 neuroblastoma tumors (GSE120572) and 24 human neuroblastoma cell lines (GSE28019) were  
1413 accessed through the R2 genomics analysis and visualization platform  
1414 (<https://hgserver1.amc.nl/cgi-bin/r2/>). Clinical annotations for tumors were obtained from  
1415 GSE49711/GSE62564 regarding MYCN status (MYCN-nonamplified vs. MYCN-amplified, INSS  
1416 stage [high (stage 4) vs. low (1, 2, 3 and 4s)], risk status (high vs. low) and age (< 18 months vs.  
1417 ≥ 18 months).

1418

1419

1420

1421

1422 **Analysis of RNA-sequencing data**

1423 **RNA-seq data processing and identification of differentially expressed genes**

1424 Single-end RNA-seq samples with 40 base pair (bp) read lengths were mapped to the human  
1425 genome (GRCh38) and ERCC spike-in sequences. Reads were mapped to the genome using  
1426 Bowtie2 (version 2.3.4.3) and default parameters. Reads that overlapped with the genomic  
1427 location for exonic regions were used to calculate gene counts with the FeatureCounts (Subread  
1428 package of version 1.6.3) package. Further, spike-in read counts were used for each sample to  
1429 normalize the library sizes. These read counts were used to calculate the sample-specific size  
1430 factor by using the function estimateSizeFactors (DESeq2) available in R. Normalized sample  
1431 coverage profiles were then created from previously determined size factors by using  
1432 bamCoverage (DeepTools v3.0.2) and parameters "--scaleFactor --skipNonCoveredRegions". To  
1433 check the reproducibility of biological replicates for each condition, principal component analysis  
1434 (PCA) and correlation (Spearman's rank coefficient) were assessed from the sample coverage  
1435 profiles at genome-wide scale and visualized using scatterplots and heatmaps. Because these  
1436 analyses showed a high correlation of sample coverage profiles between replicates, replicates  
1437 were merged using samtools merge and processed again as described for the individual  
1438 replicates. Next, differential gene expression analysis was performed using the DESeq2 in R. To  
1439 detect differentially expressed genes (DEGs) in each sample, raw read counts from RNA-seq  
1440 data were imported to the DESeq2 and the size factors calculated using the estimateSizeFactors  
1441 function. A transcript with an absolute log<sub>2</sub> fold-change  $\geq 1.5$  and an adjusted *P*-value  $\leq 0.01$  was  
1442 considered significant.

1443

1444 **Enrichment analysis**

1445 Gene ontology enrichment for selected gene sets was performed by the Enrichr program  
1446 (<https://amp.pharm.mssm.edu/Enrichr/>). All GO terms were ranked based on the Enrichr  
1447 combined score, calculated by multiplying the adjusted *P*-value with the z-score using the Fisher's

1448 exact test. The Fisher's exact test was used to determine significant overlaps between the queried  
1449 gene sets and other publicly available datasets. Enrichment of gene sets was considered  
1450 significant for an adjusted P-value  $\leq 0.01$ , unless stated otherwise.

1451

#### 1452 **Estimation of immune cell content in neuroblastoma tumors**

1453 Cell type identification by estimating relative subsets (CIBERSORT)<sup>43</sup>, a deconvolution method  
1454 was used to evaluate immune cell fractions from gene expression data using the R package  
1455 'immunedeconv'. RNA transcript estimations were generated for all 498 neuroblastoma tumors  
1456 using the LM22 signature matrix available for 22 immune cell types. CIBERSORT was run in  
1457 "Absolute mode" with disabled quantile normalization as recommended for tumor RNA-seq data  
1458 and the overall immune content produced by the algorithm compared among tumors.

1459

#### 1460 **ChIP-seq analysis**

1461 **Data processing-** All ChIP-seq raw datasets were processed as previously described<sup>83</sup>. The raw  
1462 read quality of the samples was accessed using the Fastqc tool (v0.11.7) to identify possible  
1463 sequencing errors and biases. Reads were aligned to the human genome (build hg19,  
1464 GRCh37.75) using the mapper Bowtie (v2.3.4.3) with default parameters. Unique and non-  
1465 duplicate reads that mapped to the reference genome were further processed using Samtools  
1466 (v1.9) and the MarkDuplicates (v2.1.1) command of Picard tools. Next, antibody enrichment in  
1467 each replicate as compared to input samples was verified using the PlotFingerprint command of  
1468 deepTools (v3.1.1). Peak caller MACS2 (2.1.1) was used to identify narrow peaks (H3K4me3 and  
1469 H3K27ac) with the parameters "--q 0.01--call-summits" and broad peaks (H3K27ac and  
1470 H3K27me3) with the parameters "--broad-cutoff 0.01". Peaks that overlapped with black-listed  
1471 regions (<http://mitra.stanford.edu/kundaje/akundaje/release/blacklists/>) of the reference genome  
1472 (mostly comprised of major satellite repeats of telomeric and pericentromeric regions) were  
1473 filtered out. Command "bamCompare" from the deepTools was used with the parameters "--

1474 scaleFactorsMethod readCount --binSize 40 --operation subtract --smoothLength 80 --  
1475 extendReads 200” to create the input normalized bedgraph tracks for each replicate and  
1476 afterwards negative values were set to zero and counts were scaled to reads per million/base pair  
1477 (rpm/bp) to account for differences in the library size. Bigwig files were created for visualization  
1478 with bedGraphToBigWig. Subsequently, correlations among the ChIP-seq replicates were  
1479 accessed using bigwigs with the command “multiBigwigSummary” from deepTools and highly  
1480 correlated replicates merged at the BAM level. Peak identifications were then repeated in the  
1481 same manner for these merged BAM files.

1482

1483 **Identification of super-enhancer regions-** Super-enhancers (SEs) were identified using the  
1484 ROSE algorithm ([https://bitbucket.org/young\\_computation/rose/src/master/](https://bitbucket.org/young_computation/rose/src/master/)). Briefly, H3K27ac  
1485 binding regions identified by MACS2 as significant peaks, termed typical enhancers, were stitched  
1486 together if they were within 12.5 kb of each other. These stitched enhancers were ranked by  
1487 comparing the H3K27ac signal (density \* length) with the input signal. The ROSE algorithm was  
1488 used to determine the inclination point for all stitched H3K27ac signals and to segregate regular  
1489 enhancers from SEs. To compare SEs in 5Y-parental, 5Y-LDK-resistant and SH-EP cells, the  
1490 same maximum threshold was used between the conditions.

1491

1492 **Analysis of histone binding changes between lineage states-** To analyze the changes in  
1493 occupancies of active (H3K27ac and H3K4me3) and repressive (H3K27me3) histone marks  
1494 during the transition from adrenergic (5Y-par.) to mesenchymal (5Y-LDK-res., SHEP) states, we  
1495 compared the peaks of histone marks identified by MACS2 at the promoter regions. For this  
1496 purpose, we first extracted the promoter regions  $\pm$  2 kb with respect to the TSS (-2kb upstream  
1497 to +2kb downstream) of all annotated protein coding genes and subsequently, retrieved the peaks  
1498 of H3K27ac, H3K4me3 and H3K27me3 from 5Y-par., 5Y-LDK-res. and SH-EP cells. Now, to  
1499 determine the differential binding of each histone mark between 5Y-par. and 5Y-LDK-res. cells,

1500 we first combined all significant peaks called by MACS2 at the promoter regions and merged the  
1501 peak regions that overlapped by at least 50%. This 50% threshold was used to avoid merging  
1502 peaks that had clear and distinct summits. Next, the normalized active or repressive histone  
1503 marks read densities were calculated for each region and a ratio of [ $\log_2(5Y\text{-LDK-res.}/5Y\text{-par.})$ ]  
1504 was calculated. Shared peaks had similar enrichment of either active or repressive histone marks  
1505 in both the cell types. Similar comparisons were made for active or repressive histone marks  
1506 between 5Y-par. and SH-EP cells. To further compare changes in all histone marks at the  
1507 promoters of immune genes, the gain of significant H3K27ac, H3K4me3 binding and loss of  
1508 H3K27me3 signals were listed in mesenchymal (5Y-LDK-res., SHEP) cells as compared to  
1509 adrenergic (5Y-par.) cells.

1510

1511 **Integrated analysis of histone binding and gene expression-** Cell-type specific differential  
1512 enrichment of H3K27me3 and H3K4me3 binding in 5Y-par., 5Y-LDK-res. and SH-EP cells was  
1513 determined by calculating the  $\log_2(H3K4me3+1/H3K27me3+1)$  ratios in the promoter regions  
1514 (TSS  $\pm$  2 kb) of immune genes. Next, to examine the association between gene expression and  
1515 differential enrichment of H3K27me3 and H3K4me3 binding in immune genes in 5Y-par., 5Y-LDK-  
1516 res. and SH-EP cells, genes were ranked based on their expression values and plotted against  
1517 the calculated ratios between the histone marks.
